# Supplementary material for: A Novel m6A-Related LncRNA Signature for Predicting Prognosis, Chemotherapy and Immunotherapy Response in Patients with Lung Adenocarcinoma
Source: MDPI journal article supplement (doi:10.3390/cells11152399), 2022-08-03
Supplement: s1 [file s1]

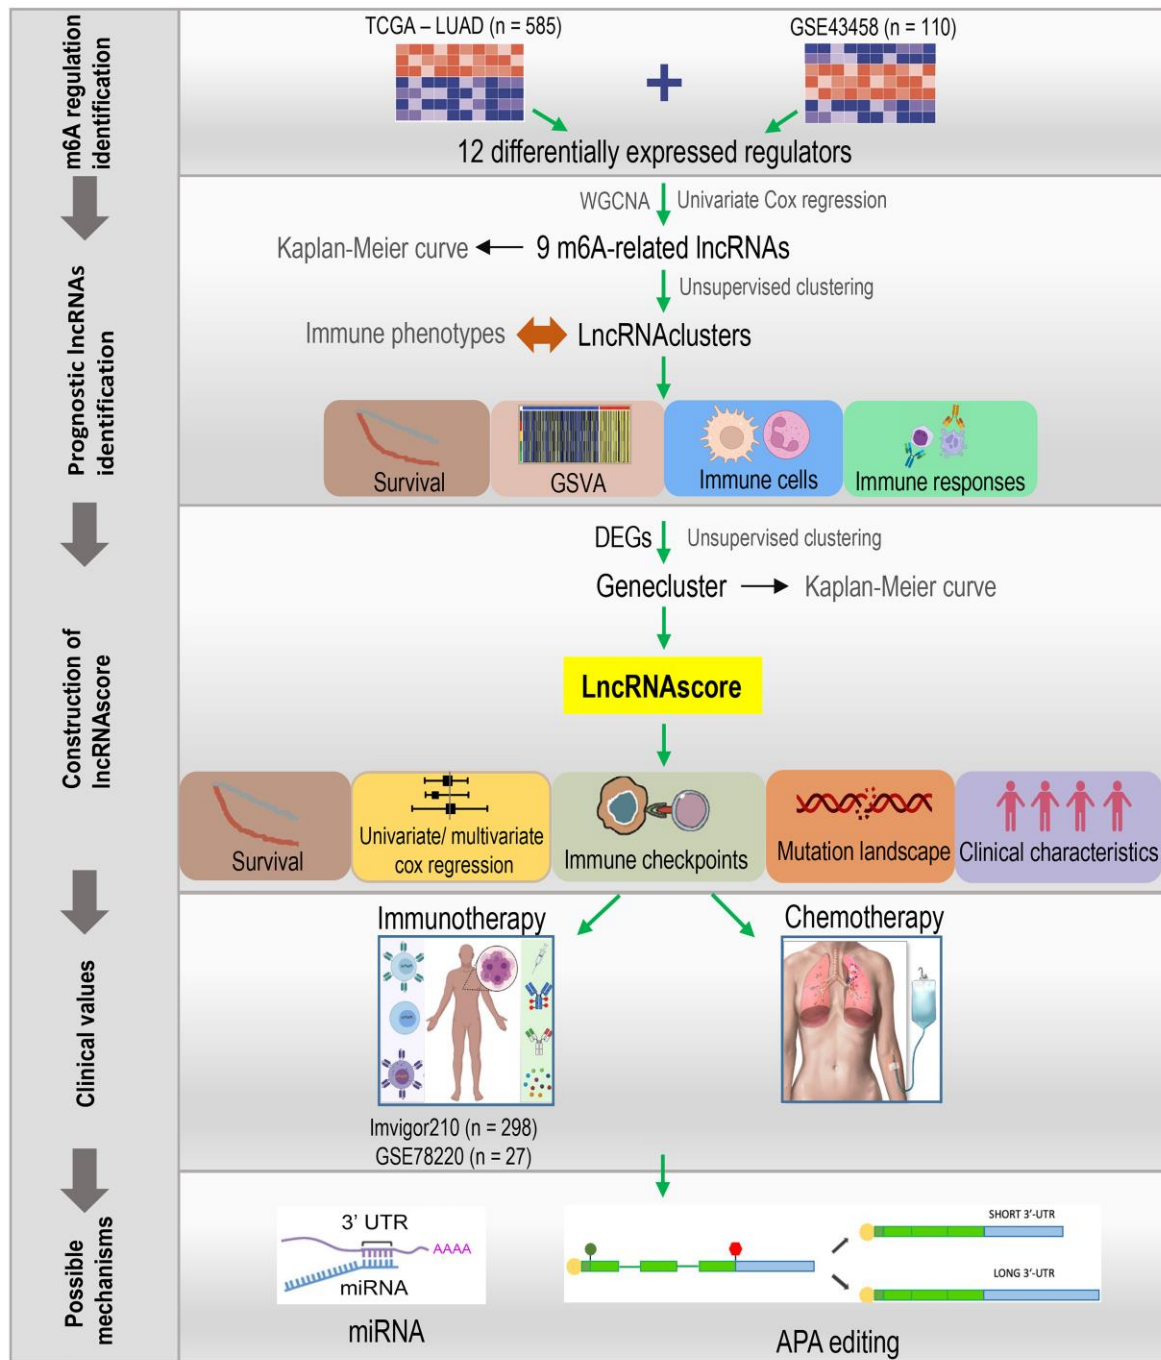

**Figure S1.** Overview of our study.

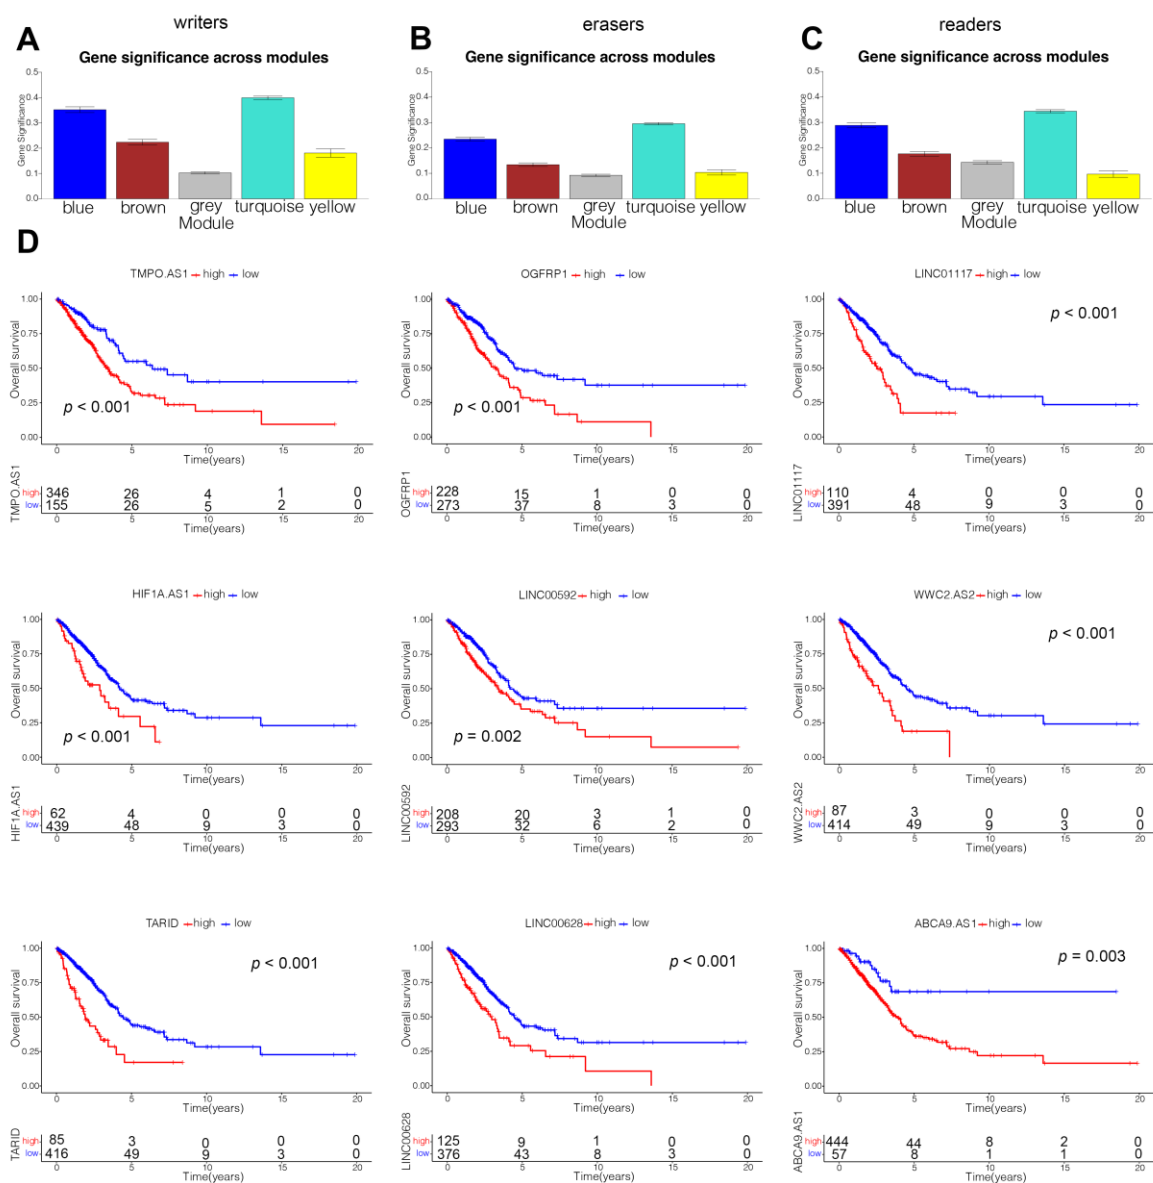

**Figure S2.** Nine lncRNAs were highly correlated with the survival of LUAD patients.

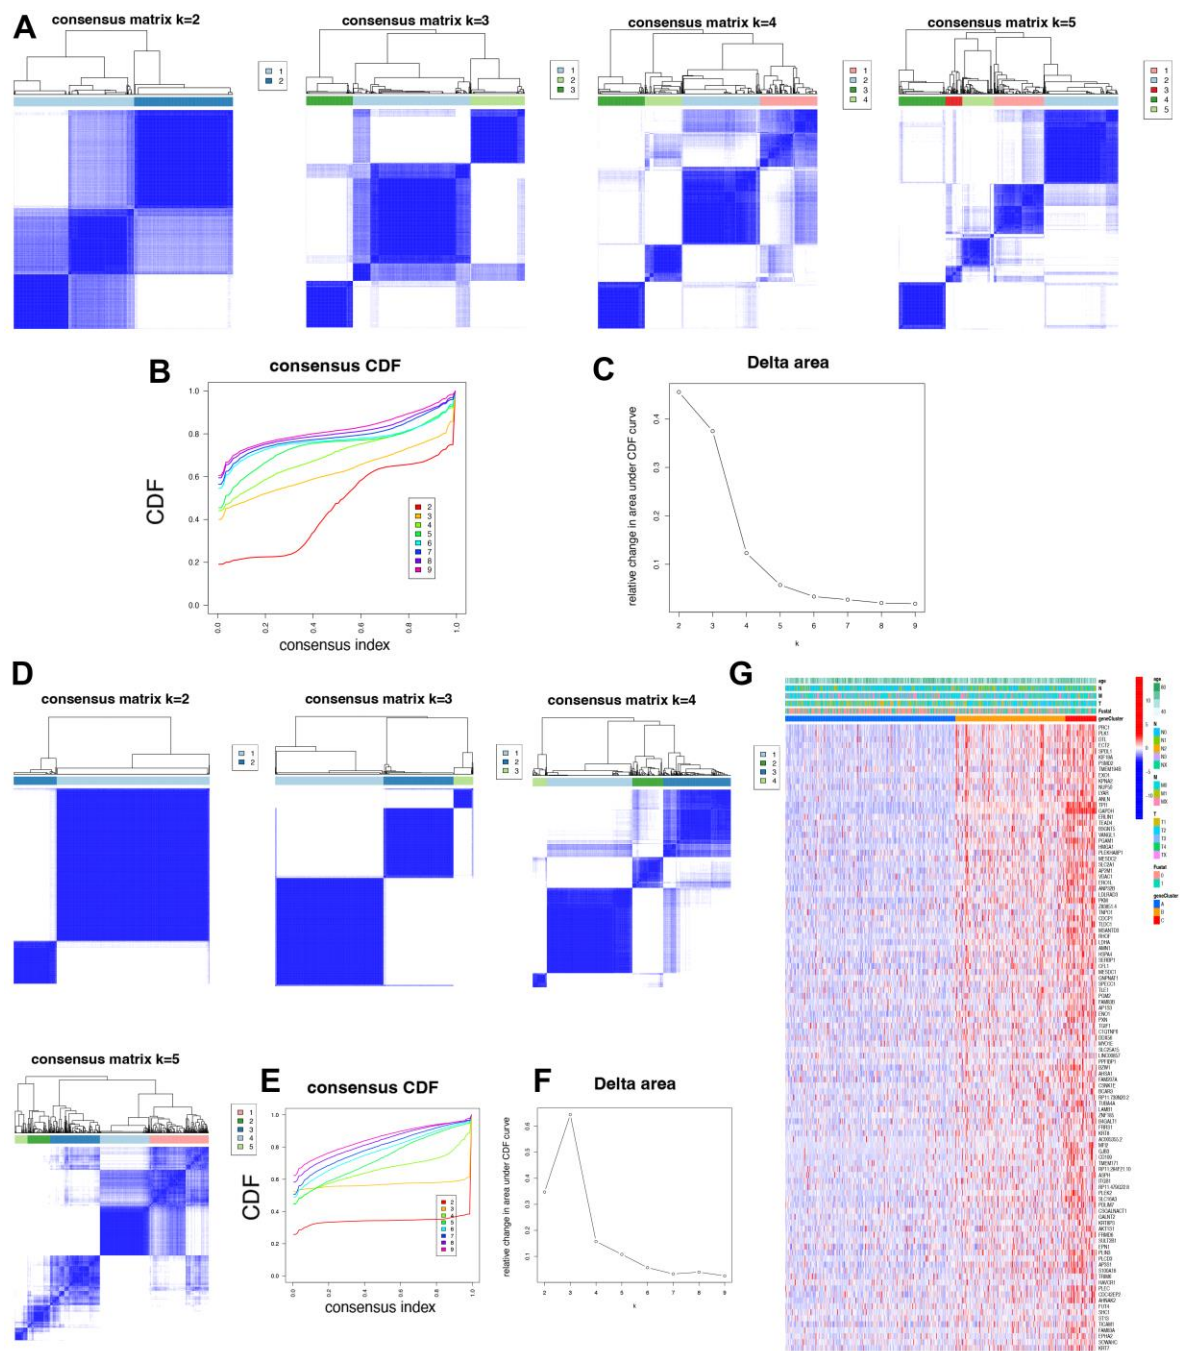

**Figure S3.** Unsupervised clustering of lncRNAs and DEGs; (A) Consensus matrices of TCGA-LUAD cohort for  $k = 2$  to 5.

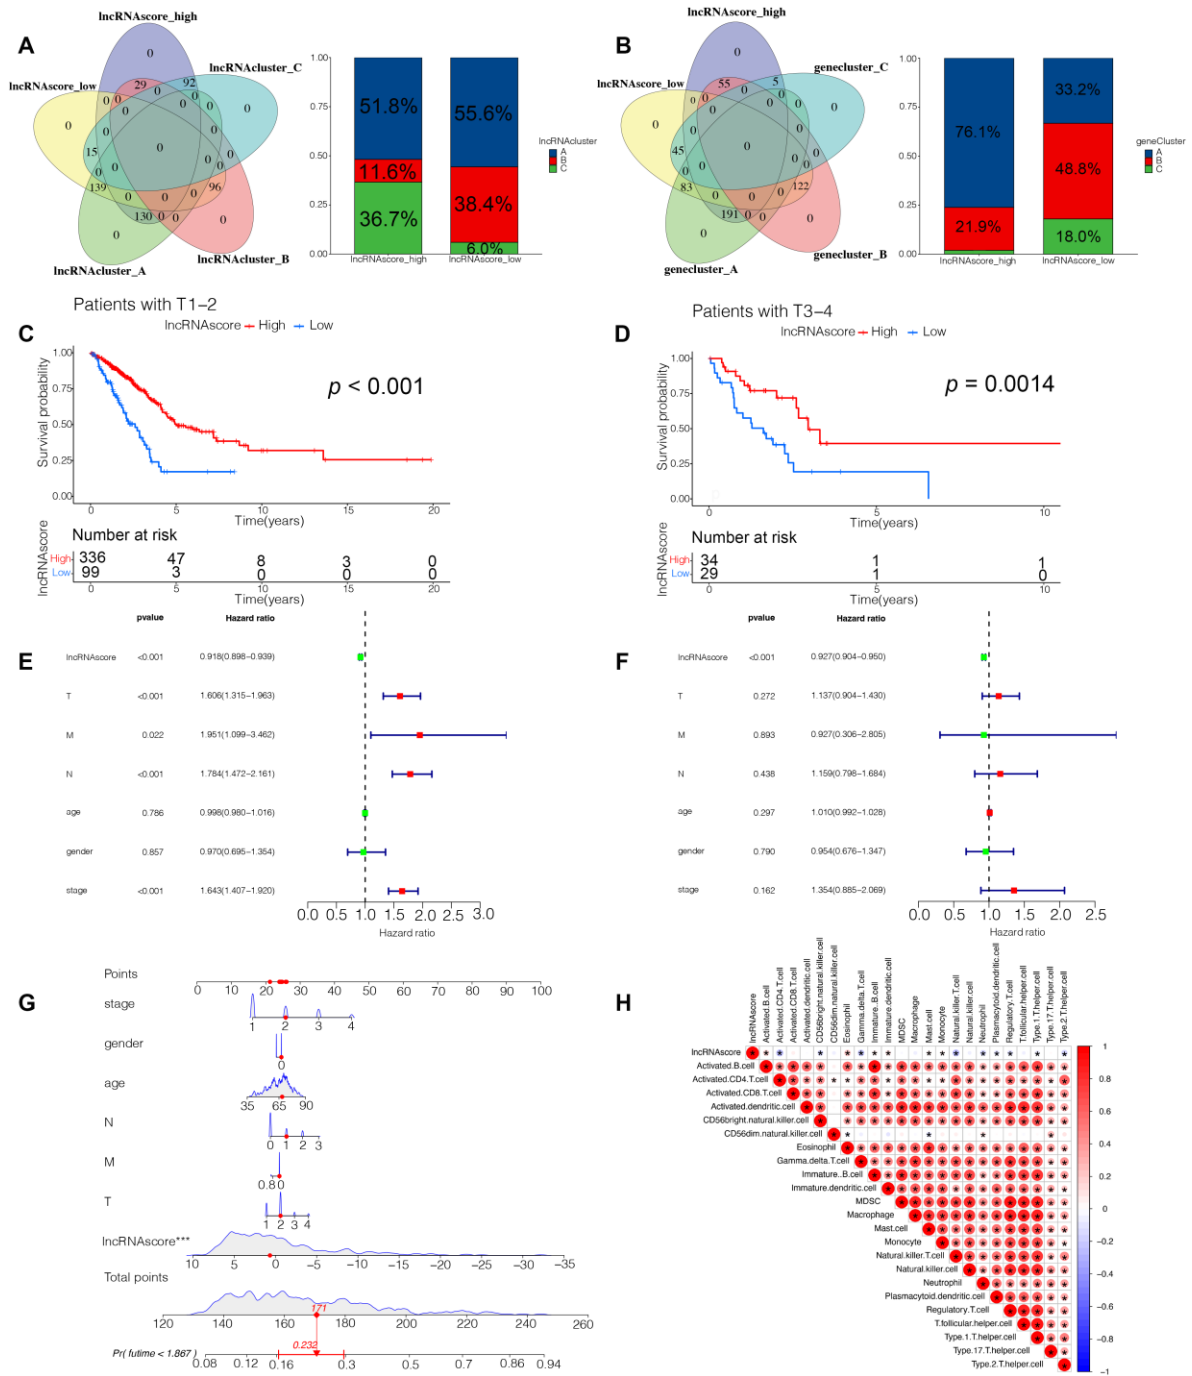

**Figure S4.** Prognostic value of IncRNA score and correlation between the clinicopathological features and IncRNA score.
