# Supplementary material for: A Novel m6A-Related LncRNA Signature for Predicting Prognosis, Chemotherapy and Immunotherapy Response in Patients with Lung Adenocarcinoma
Source: Cells. 2022 Aug 3;11(15):2399. doi: 10.3390/cells11152399 (PMC9368324; doi:10.3390/cells11152399)
Supplement: Supplementary file 1 [file cells-11-02399-s001.zip › cells-1809121-Supplementary Tables.xls]

## Sheet: S1
Table S1. The cut-off values used in the study
	TCGA	IMvigor210	GSE78220
TMPO.AS1	2.23672	-	-
OGFRP1	2.24006	-	-
LINC01117	2.17225	-	-
HIF1A.AS1	2.18434	-	-
LINC00592	2.00704	-	-
WWC2.AS2	2.18185	-	-
TARID	2.08406	-	-
LINC00628	2.01356	-	-
ABCA9.AS1	1.71995	-	-
lncRNAscore	-2.02177	-4.88093	-5.93322
Note: all gene expression value was transformed into log2(x+1)

## Sheet: S2
Table S2: Differentially expressed lncRNAs in the turquoise module.
	TCGA.MP.A4T4.01A	TCGA.05.4250.01A	TCGA.64.5774.01A	TCGA.97.7937.01A	TCGA.97.A4M6.01A	TCGA.44.A4SU.01A	TCGA.78.7155.01A	TCGA.78.7163.01A	TCGA.55.7574.01A	TCGA.78.7535.01A	TCGA.55.8619.01A	TCGA.95.7567.01A	TCGA.44.7670.01A	TCGA.NJ.A7XG.01A	TCGA.44.8117.01A	TCGA.62.8402.01A	TCGA.49.4507.01A	TCGA.J2.A4AD.01A	TCGA.55.A490.01A	TCGA.67.3770.01A	TCGA.55.A48Y.01A	TCGA.44.3918.01A	TCGA.05.4249.01A	TCGA.67.4679.01B	TCGA.55.A494.01A	TCGA.64.5778.01A	TCGA.49.AARQ.01A	TCGA.95.8494.01A	TCGA.55.7726.01A	TCGA.78.8660.01A	TCGA.49.4490.01A	TCGA.J2.8194.01A	TCGA.44.2659.01A	TCGA.78.7633.01A	TCGA.55.8299.01A	TCGA.67.6217.01A	TCGA.67.3774.01A	TCGA.MP.A4T6.01A	TCGA.50.5942.01A	TCGA.55.A48Z.01A	TCGA.99.AA5R.01A	TCGA.86.8280.01A	TCGA.83.5908.01A	TCGA.78.7146.01A	TCGA.95.7948.01A	TCGA.55.7570.01A	TCGA.50.5072.01A	TCGA.91.8499.01A	TCGA.49.AAQV.01A
LINC01291	3.18332	3.73687	1.83568	2.50598	1.89627	1.69659	2.59926	3.30947	2.64103	1.60601	2.83649	2.65298	4.21921	2.73632	1.93658	1.90877	2.9597	2.56969	1.70324	2.33027	2.23772	1.96859	1.97392	1.83501	1.94732	2.4862	2.56179	2.67351	2.62305	1.85785	2.87693	3.01066	2.63706	3.19213	2.47689	2.4016	1.90149	3.75255	3.54074	2.68126	1.7587	1.87557	2.80277	2.05772	2.84559	2.97026	2.82035	2.30233	2.40621
PSMG3-AS1	3.43293	3.34218	1.95671	2.64258	3.07422	4.43882	2.27059	3.51558	2.9334	4.20128	2.73777	2.41915	2.59534	3.29127	3.17805	2.2489	3.28141	3.30053	1.91888	3.3797	3.77483	2.36489	2.93771	2.78662	4.48406	3.30414	2.12517	2.99992	2.67767	2.62878	2.79767	3.2267	2.72968	3.05606	3.29456	3.53708	3.07299	3.5184	3.64757	2.65334	2.8785	3.15249	3.15964	2.93812	3.62081	2.47984	3.48244	2.15099	3.33625
PLBD1-AS1	2.22608	2.38523	3.34053	3.05387	2.67432	2.87365	3.61596	2.6023	2.60476	2.23204	2.01556	2.28203	2.70904	2.78711	3.73902	3.38421	1.65276	3.36319	3.73137	3.69237	2.92599	2.83461	2.73062	3.38083	4.72893	2.72538	1.5327	2.16325	2.6513	3.01779	2.8385	2.42965	3.78789	2.98523	2.19086	3.40311	2.73503	3.6188	3.68136	2.88452	2.20386	3.53649	2.70784	3.45853	2.03416	3.46299	3.65948	2.65515	2.25969
HCG11	3.36762	2.98521	4.83073	2.73014	3.0587	3.2888	3.4404	2.9938	3.47098	2.69628	3.11273	4.35701	2.46726	3.64411	3.83963	4.10781	2.03719	3.83709	2.22409	2.26165	3.26878	3.27644	3.97552	3.29961	3.73496	2.33934	2.32063	2.84716	3.96091	3.08132	3.18652	3.89234	3.5994	2.97642	3.57512	4.24719	3.07753	3.11993	4.21286	3.52174	3.40666	3.62325	3.68761	3.96512	4.56155	4.268	3.72813	3.36826	3.29998
TBX5-AS1	2.6415	2.6984	2.30321	2.48279	3.18157	2.56509	2.34886	1.99572	3.14695	1.79701	3.38068	2.4065	2.17208	2.72675	2.71355	2.13807	1.89057	2.83233	2.1681	2.89528	2.70211	2.63138	2.74277	3.27896	2.31644	2.24869	1.57839	2.20703	3.43281	2.31554	3.04912	2.96553	3.51416	2.82578	2.99272	2.96785	3.05449	2.39055	3.38456	2.758	3.77187	3.46431	2.93513	2.26557	2.38916	2.34693	2.63796	2.81012	2.12319
MID1IP1-AS1	2.95451	3.03787	2.95027	2.17535	2.30727	2.34825	2.2491	3.30308	3.17857	1.80468	3.15797	2.86493	3.18603	2.64504	4.68664	2.57697	1.91503	2.0782	2.23665	2.39043	2.61943	2.08151	2.5874	3.2085	3.03684	2.08625	2.14895	3.41529	2.22287	2.64727	2.15382	3.24075	2.59071	3.40972	3.04142	3.41575	3.06644	3.58327	4.16829	2.21591	2.74351	3.61041	2.65477	3.02757	2.58526	2.77428	2.67204	3.00041	2.79904
SNHG16	4.14621	4.77157	4.45732	4.71988	4.02105	3.25963	4.72236	3.4147	4.0271	2.79085	2.98872	4.68721	4.68916	4.10915	4.87497	4.63094	3.81095	3.27923	4.39056	4.32561	3.67031	4.79709	4.51103	3.97712	4.16959	3.34996	2.45233	4.18304	4.14616	4.1943	3.97838	4.89202	4.12235	4.53384	4.31291	4.40815	3.93373	3.78762	4.46144	3.47256	3.44855	3.5441	4.28596	3.72461	5.4756	4.44071	4.3482	4.07299	3.91444
TGFB2-AS1	2.49571	2.85986	1.96102	2.742	3.53715	2.1358	2.22822	1.99958	2.08331	1.69882	2.20043	2.21438	3.26196	2.36651	3.80263	2.29163	1.76927	3.93693	1.88881	2.37358	1.88642	1.83601	2.88443	2.26172	2.01419	1.911	1.53524	2.17897	3.47486	2.06392	2.35538	2.16663	2.50286	2.23994	3.24021	1.91346	2.48691	1.92506	2.61896	1.87204	2.86538	2.57941	2.72532	3.71837	2.19682	5.10657	2.32654	2.17665	2.0479
OIP5-AS1	4.12175	4.39129	4.58717	4.6126	4.82636	4.15605	5.11694	4.22828	4.86883	3.93883	4.2738	4.27653	4.86625	4.13093	4.55595	4.6731	4.77852	4.73422	4.12921	4.26018	5.14129	4.76181	4.68062	4.9305	4.85441	4.3424	3.50902	4.19841	5.00536	4.06963	3.94138	5.16949	4.07215	5.91345	5.03367	4.82401	5.09986	4.39712	4.8158	4.48606	4.40122	4.45818	4.70358	4.04954	5.33221	4.7007	5.05921	4.73092	4.23001
LINC00654	2.63249	3.60224	3.23549	3.19816	3.03445	3.12378	2.69574	2.82118	2.77478	2.0006	2.54532	1.93383	3.05355	2.62573	2.49358	3.16344	1.95055	3.03075	2.35486	3.30413	2.84531	3.11495	2.73863	2.41485	3.46714	2.24871	1.79701	2.42176	2.3494	2.47712	2.45408	3.71209	2.54114	2.95931	2.46067	2.23275	2.65313	2.80982	3.24817	2.89074	2.18484	2.69365	2.99256	2.74223	3.11792	2.57218	2.79534	3.30427	2.77943
NNT-AS1	2.58562	3.41432	4.23194	4.39036	3.64758	3.46284	4.49431	3.75418	3.41487	3.14116	2.80131	2.95046	4.08076	3.28672	4.33451	4.08962	2.89759	3.60357	2.51684	3.72095	3.20439	3.23388	3.20224	3.30799	3.57905	4.56176	2.9833	3.26041	3.48043	2.93595	3.22183	3.59927	3.68223	3.92499	3.08545	3.62223	3.34185	2.65741	3.53461	3.81616	3.14166	3.25016	4.61378	3.19319	3.27677	4.32614	3.05872	6.18485	3.34579
TRAM2-AS1	3.00116	3.25261	3.32133	2.88172	3.70149	3.54915	3.41456	3.77034	2.9224	2.50227	2.93496	2.88685	5.06177	3.32371	3.3511	2.87929	3.12085	3.94095	2.52598	4.7218	3.17645	3.48264	3.82574	3.49066	3.57145	4.06641	2.19369	2.75112	3.03305	3.08741	3.46456	4.10081	3.74883	4.33294	3.19171	3.62598	3.77397	3.8921	4.00649	3.21707	3.13294	3.47898	2.93174	3.41362	4.90863	4.18877	3.9217	4.43755	3.33117
FGF14-AS2	2.14644	2.92365	2.12218	1.94604	2.30968	2.31234	2.23526	3.52898	2.60823	1.69049	2.80886	1.976	4.866	2.92633	2.14858	2.19511	1.99811	2.30629	1.91315	2.36686	1.91109	2.08536	2.50188	2.88006	2.017	4.32621	2.12258	2.11197	2.52143	2.57549	2.98113	2.70383	2.37294	2.76155	2.98766	2.54921	2.67661	2.59234	3.60477	3.02182	3.34663	2.76836	2.3978	2.18819	3.26812	2.00421	2.89408	2.81662	2.04714
PAXIP1-AS2	3.26126	3.17047	2.78801	2.84496	2.88993	3.26439	2.25147	3.05913	3.39734	2.11188	2.97132	2.69156	2.99429	2.8486	2.84467	3.05863	2.1448	2.63914	2.16303	3.47584	2.35669	2.4189	3.22644	3.25105	3.3553	2.6815	2.70895	3.95648	2.94376	2.63867	2.57629	3.06811	2.91906	3.43257	3.25068	3.14015	3.04709	3.70175	3.63114	2.86857	3.43065	3.63596	3.12221	3.67815	3.08947	2.75545	2.72831	2.66275	3.11955
RHPN1-AS1	2.90616	2.76022	2.39588	2.83709	2.87803	3.00188	2.71609	2.80951	2.22932	3.35602	2.08593	2.85756	3.33668	2.52353	2.85974	2.27736	2.32281	4.06376	2.22779	3.19861	2.6954	2.87805	2.62115	2.16075	4.11154	2.58234	2.45634	2.89497	2.13343	2.75245	3.18451	3.12889	2.73685	2.59968	2.61426	2.71743	2.69121	3.43534	2.61523	3.19129	2.29123	2.91509	2.85858	3.72739	3.79856	3.3485	3.55381	3.36135	3.78414
FGD5-AS1	5.40325	6.67146	6.28826	5.85555	5.68057	5.73815	7.02048	5.77036	6.24374	4.82545	5.84866	5.60513	6.44664	5.69504	5.81751	6.15789	6.19633	6.46587	4.71934	6.02851	5.96534	6.22497	5.73357	5.88195	5.76608	6.31295	5.4697	5.17302	6.14498	5.45612	5.73199	6.68266	5.78295	5.92736	5.85566	5.83748	6.77896	5.28714	6.46387	6.18197	5.95219	6.10936	5.94128	6.39983	6.1956	5.82619	5.98776	6.95383	4.80477
LINC00638	2.95212	2.65936	2.59786	2.57388	2.81182	3.91849	2.72712	2.55097	2.43026	3.05716	2.11346	2.97856	2.41101	2.19034	3.27383	1.97972	2.31315	2.36017	2.70468	2.95651	2.84433	2.53667	2.30191	2.17871	3.17934	1.9843	1.82529	3.22561	2.52219	2.34343	2.39361	2.64767	2.27157	3.38554	2.28345	2.26374	2.20461	4.02132	2.49427	2.6902	2.20284	2.84462	2.54838	3.31554	2.60489	2.36114	2.34682	2.42384	2.21433
LINC01278	3.64531	3.66032	4.04915	3.17929	3.69922	3.6329	3.82709	5.46555	3.847	3.41354	3.76565	3.38629	2.63809	4.80939	3.52173	3.81878	3.04405	4.27948	3.98614	3.66991	3.32492	2.65897	3.56414	3.97072	3.81253	3.75641	4.33301	3.50638	4.27744	3.36542	3.72282	4.15752	4.56273	3.97583	3.42338	4.06335	4.08155	4.51949	3.98373	3.92971	3.79825	4.30159	3.91579	4.55285	3.61384	3.54903	3.31372	3.49414	3.61473
WNT5A-AS1	2.06583	2.38667	2.63602	2.55618	2.3198	2.57227	3.65926	1.88355	2.44376	2.43558	2.54988	2.29323	2.40904	3.12182	3.40943	2.85166	1.73167	2.22819	2.33596	2.15456	1.86168	2.56164	2.54577	2.57151	2.21772	2.71661	2.48431	2.20597	2.96191	2.13257	2.13482	2.63004	2.02876	2.64786	2.27367	2.2824	2.23265	2.86535	2.43811	2.31261	2.4654	2.57871	2.49271	2.09551	3.4623	2.95297	2.2724	3.90638	2.15035
LOXL1-AS1	2.32735	3.14758	2.34078	2.10485	3.39743	3.39909	2.14919	3.47271	2.64472	2.01849	2.46509	2.52118	2.96514	3.00351	2.07792	2.71436	2.32424	2.69561	2.74942	2.77387	2.88486	2.3102	2.85463	2.80982	3.88936	2.37456	1.68297	2.167	2.88436	2.0918	3.11538	3.28821	2.33495	2.73733	2.54918	2.66122	2.89146	3.91496	2.76654	2.63649	2.32552	3.18171	3.05489	2.42425	3.26821	3.11772	3.06204	2.50948	3.12399
RPS6KA2-IT1	2.63246	2.07733	2.2364	2.9527	2.26708	2.06574	2.07673	1.94053	3.39676	2.63362	1.88252	2.9506	2.33566	2.32487	3.39364	2.02619	1.67592	2.80503	2.21173	2.05957	2.48859	2.09007	2.43873	2.14479	3.15476	1.9052	2.03339	2.16986	2.62966	2.79737	2.62243	2.88938	2.52003	3.34837	2.47837	2.52393	2.72748	2.61825	1.98134	2.50277	1.95569	2.37661	2.70374	2.47442	2.08903	1.9412	2.5662	1.91419	2.53686
OTUD6B-AS1	3.337	3.68902	3.87491	4.14125	3.77938	3.58554	3.79595	3.55505	3.54837	3.10165	3.23827	3.14845	3.97297	4.24181	3.75781	3.75786	3.23502	4.14399	4.56169	4.11231	4.02636	3.89548	3.19258	3.50802	3.21694	4.14147	2.50357	3.60793	3.8125	3.52847	2.91607	4.86587	3.34725	3.74684	3.47487	4.39895	3.79304	3.31369	3.95923	4.12846	3.50265	3.91973	3.69128	4.74768	4.44865	4.19086	3.90277	5.15595	3.72608
LINC01232	2.42515	2.71475	2.66334	2.5921	2.7027	2.68676	2.49355	3.0014	2.25546	1.83637	2.14987	2.54392	4.67564	2.19417	2.03431	3.47484	2.94083	2.64611	1.80624	3.35002	1.90797	2.18698	2.4059	1.98506	2.78294	2.67174	2.71738	2.7245	2.90624	2.10225	2.79749	2.3315	2.02062	2.72101	2.40119	2.43135	2.42165	3.01662	2.16932	2.52729	2.27061	2.40612	2.97847	2.75494	4.07472	2.13223	2.26978	2.39013	2.01452
DAXX	5.36437	5.59091	5.74177	5.82927	5.87659	5.51264	6.88905	5.18539	5.53868	5.22863	5.42109	5.79658	6.39501	5.6597	5.52274	6.07217	5.52065	5.57205	5.38391	4.80507	5.65301	5.16624	6.05618	5.79524	5.61993	5.85341	5.31267	4.9128	5.87137	5.54789	6.01062	5.95969	5.87174	5.98517	5.74066	5.64375	5.62464	5.82973	5.47489	5.50684	5.22123	5.95825	5.96238	5.73864	6.04491	6.11918	5.94418	6.46355	5.48404
ARHGEF26-AS1	2.51123	2.64686	2.54964	2.31688	2.46727	2.76494	2.17411	2.98692	2.39139	1.71348	1.92188	2.23754	2.62174	2.40464	2.68908	2.27965	1.74815	2.9519	3.08754	4.06426	2.38049	2.80209	2.57283	2.11352	2.94273	3.53994	3.11423	3.21575	1.90495	2.28599	2.71002	3.01017	2.82548	2.99688	2.1419	3.22957	2.63718	2.73514	2.17544	2.79371	2.29449	2.97754	2.34549	2.83466	2.20483	2.22857	2.22233	2.06666	2.116
DUXAP8	1.99854	2.24345	2.51808	3.54714	1.94957	2.44123	2.18075	1.89563	2.35158	1.64636	1.75717	1.99934	3.08677	1.93417	2.06577	2.6963	2.51233	3.33409	2.21667	1.92578	1.82983	1.82331	3.26264	1.91826	2.78066	1.88854	2.15539	1.9405	2.80061	2.31439	3.59688	2.09353	2.15004	2.503	2.15799	2.11425	1.91447	1.96963	2.70959	2.01952	1.7842	2.22669	2.19142	3.43344	2.11678	2.98061	2.3167	2.39221	2.20801
NR2F1-AS1	2.83666	2.26928	2.56432	2.86538	2.92732	2.9204	2.72725	4.85006	2.53916	2.60044	2.23574	2.67679	2.10353	3.30899	3.26484	2.29996	1.81646	2.70866	2.05634	2.29328	2.08358	2.52025	2.30877	2.48726	2.11979	2.54512	2.02611	3.11084	2.78625	2.36145	3.10957	2.40035	3.05976	2.22595	2.52104	2.73069	2.43967	2.1905	2.31372	2.44682	2.58631	2.94451	3.20285	2.22298	3.8901	2.59981	2.46184	2.36378	2.1503
MAGI2-AS3	2.48754	2.81995	2.34786	2.25508	2.82968	2.25335	2.20885	1.95278	3.16411	1.81315	2.68466	2.31881	2.33123	2.98598	2.78807	2.17483	2.00855	2.54932	2.25994	2.51636	2.51893	2.97021	2.57134	3.52022	2.1864	2.22419	1.61668	2.08834	3.03724	2.69097	2.47482	2.9098	2.56273	2.55785	2.93873	2.46668	2.8339	2.13474	3.64746	2.88298	3.10436	2.81516	2.71073	2.30821	2.17821	2.28861	2.63988	2.2929	2.16987
RASSF8-AS1	2.75807	2.76292	2.71728	2.09181	2.41379	2.21145	3.0987	2.52197	2.71828	2.10783	2.21744	2.61879	2.82086	2.37776	2.94429	2.43031	2.16475	2.27549	2.07704	2.6018	1.96463	2.1678	2.34889	2.7507	2.54158	2.45688	2.28662	3.86687	2.71385	2.1114	2.29959	2.27813	2.52953	2.41004	2.42572	2.76777	2.73888	2.84061	2.24617	2.48949	2.33905	2.87671	2.77422	2.43969	2.45001	2.01693	2.83382	2.14449	2.18608
TPRG1-AS1	2.51463	2.68933	2.17592	2.51341	2.23486	2.00746	2.1098	2.9797	2.33479	1.9151	2.39685	2.19446	2.26191	1.97786	2.8788	1.93806	3.09677	3.10052	2.33408	4.08448	2.2526	2.79416	2.29575	2.26809	2.11589	2.26079	1.80935	3.40772	2.87258	2.65159	2.60811	2.93286	2.11286	2.36648	2.56621	3.03799	2.56812	2.12739	2.20965	1.84921	2.11727	2.63578	2.71214	3.34785	2.20634	2.21386	3.00199	2.78534	1.97081
LINC00649	2.34051	2.06927	2.467	1.89478	3.75494	2.54931	2.66188	2.1777	2.60343	2.79284	2.06478	2.53041	2.15663	1.97067	2.05426	2.6535	2.18263	2.78065	1.877	2.32946	1.83939	1.80263	2.54441	1.94695	2.60506	1.9577	1.63873	1.99776	2.64833	2.17669	2.65934	2.78465	2.10399	2.02467	2.32189	3.36638	2.54958	3.20371	2.07061	2.5763	2.41455	2.6468	2.45399	3.03061	1.99055	3.0673	2.53726	2.33593	3.42422
LINC00884	2.37373	2.54304	3.28166	2.26227	2.02421	2.86746	2.97292	3.00355	2.11591	2.29121	1.92445	2.29661	2.88547	2.24391	2.44924	2.73807	2.22557	2.48553	3.00499	2.55831	2.20409	2.74284	2.29096	2.10653	2.77965	2.34139	2.17858	2.29929	1.96919	2.28328	2.04796	2.2773	2.07028	2.22834	2.34426	2.3846	2.11854	3.09159	2.58005	2.38136	2.21783	2.4188	2.65753	2.18788	2.41193	2.77915	2.92718	3.79295	3.06452
ST3GAL5-AS1	2.60149	2.13714	2.09113	2.18012	2.24694	2.20009	2.17251	2.64914	2.57547	2.08102	1.77506	2.17371	2.19865	3.00779	3.51691	2.02453	1.75279	2.34377	2.74207	3.47937	1.92248	2.73633	2.81847	3.42043	2.28679	3.03028	2.55246	2.36895	2.04177	2.28312	2.17891	2.50115	2.84495	3.14746	2.45427	2.99482	2.67881	2.688	3.48514	2.11239	2.47793	2.39166	2.1498	2.23553	2.76612	1.8873	2.02788	2.06935	1.99569
LINC00886	2.36547	2.19593	1.98654	2.83744	2.70178	1.99945	2.07978	3.01252	2.12899	2.4157	2.14007	2.23227	2.34528	2.35015	3.50565	1.95394	2.33141	2.68996	1.75984	2.85926	1.78257	2.48802	2.36617	2.68951	2.62451	2.61566	1.66032	3.28182	1.98094	2.15636	2.239	2.32966	2.37749	2.44023	2.11128	2.72366	2.2905	2.56051	3.03167	1.99992	2.55762	2.37002	2.33153	2.36456	2.41373	2.28297	2.68519	1.93087	3.24134
SBF2-AS1	2.43091	3.01298	3.63257	3.0398	2.80347	2.48415	2.48528	3.58106	2.30917	2.23085	2.1831	2.86998	3.22181	2.68936	2.87523	2.90331	2.80054	3.34651	2.16053	3.1668	2.45125	3.39521	2.51531	2.12948	3.38158	2.71763	2.16979	2.77087	2.49496	2.63686	2.4709	3.10906	2.42054	2.74188	2.5401	2.66375	2.54858	3.1404	2.53785	2.93256	2.19764	2.77685	2.52562	3.62696	3.16246	2.86708	3.0821	3.53406	2.65568
LINC00957	2.86358	3.23886	3.1734	2.88294	2.98934	3.54647	2.43329	3.37525	2.87047	2.75783	2.74345	3.40137	2.51577	3.4117	3.1599	2.4414	2.1079	3.3168	2.38609	3.35856	2.16867	2.30855	2.87315	2.67132	3.41101	2.59587	2.43811	3.87093	2.41696	3.37267	2.51271	2.94433	3.04903	2.94044	3.07377	2.74482	2.49495	3.71747	3.06389	2.85314	3.16142	3.29825	2.63649	3.27764	3.23544	2.59012	2.65151	2.79292	3.67281
RNF216P1	3.37409	3.97706	3.32345	3.78673	3.65716	3.57096	4.13686	3.35099	3.50848	3.12225	3.02692	3.46898	3.60649	3.12855	3.77095	3.4928	2.95983	3.45673	3.25762	3.21167	3.60976	3.03009	3.34744	3.01568	4.3603	3.4026	3.67265	4.05266	3.42116	3.67928	3.74014	3.51165	4.02028	3.05668	3.63876	3.85323	2.93024	4.3688	2.99792	3.54759	3.09909	3.87344	4.24682	3.47647	3.45021	3.22207	3.67372	3.03446	3.83637
ZEB1-AS1	2.63535	3.18968	2.99668	2.37406	2.52397	3.09749	2.42414	2.15862	2.99948	2.2918	2.38932	2.87113	3.67253	2.33709	2.78954	2.33661	2.80839	2.98863	2.24824	2.28573	2.14604	2.50685	2.59182	2.4266	2.3939	3.49014	2.42112	2.33439	2.86278	2.78681	2.67457	2.43838	2.24385	2.3502	2.86778	2.45536	2.25142	2.58298	2.34066	3.14352	2.83609	2.57246	3.02146	3.07733	2.34347	3.01467	2.60719	3.04853	2.51554
BOLA3-AS1	2.44992	3.4879	4.06649	2.17615	2.29755	2.14341	3.46919	2.57673	2.67307	1.75785	2.31723	3.10657	4.19225	2.34891	2.9059	3.75914	2.27715	2.49774	2.13639	2.19706	2.3296	2.19811	2.6943	2.26976	4.54353	2.20179	2.03465	2.29788	2.34338	3.20139	1.95515	3.13934	2.20188	2.87345	2.45989	2.398	3.02682	2.4717	2.91194	2.58731	2.62696	2.57654	2.91015	2.55914	2.39888	4.57212	2.78497	3.22369	2.21913
TAF1A-AS1	2.076	2.54675	2.6283	2.65053	2.74079	3.2863	3.89515	2.85231	2.02915	2.69643	2.23058	2.70258	3.10068	2.5029	2.17031	2.73808	3.07507	3.80127	1.86158	3.20647	2.41499	2.13227	3.00674	2.21345	2.71936	3.32259	2.28804	2.78461	2.39428	2.36639	3.12118	2.75919	2.05434	2.82039	2.30625	3.048	2.40967	3.53022	2.60192	2.42019	2.11671	3.04882	2.45935	2.86948	2.29677	3.39906	3.09937	2.98711	3.10402
LINC01018	2.00526	2.41493	2.65654	1.99469	1.9698	1.93043	2.05934	2.42046	2.21127	1.72957	1.81748	2.69598	3.75741	2.51351	1.9443	1.95146	2.02048	2.05502	1.93984	4.34401	2.25306	1.83593	2.06532	1.85768	2.92071	2.05852	1.52096	1.9267	1.907	1.86903	2.06341	2.62446	1.87539	2.32978	2.05457	2.62481	2.99289	2.74886	2.67977	2.13785	1.86209	2.09888	2.26817	2.49744	3.59662	2.3379	2.65263	3.68811	1.86176
RTCA-AS1	2.42161	2.18968	2.61568	2.98861	2.53507	3.02174	2.50848	2.46494	2.35522	2.65685	2.6033	2.51587	2.84757	2.58023	3.53683	2.97298	1.99283	3.04961	1.98645	2.45608	1.97965	2.05786	2.36431	2.73926	2.52967	2.78574	3.7308	3.21881	2.4574	2.79119	3.11354	2.91694	2.22675	2.81189	2.58962	3.15872	2.42635	2.88727	3.21502	2.61748	2.68955	3.20986	2.36831	2.80061	2.71796	2.8805	2.47401	3.44609	2.63749
C2orf27A	2.56583	2.56095	2.47561	2.60496	2.48204	2.14486	2.80889	2.21069	2.89531	2.02708	2.76943	2.84057	2.72752	2.04376	2.37705	2.23067	2.58852	3.35594	2.53081	2.52407	3.01505	2.83344	2.57978	2.26411	2.66652	1.91573	2.08406	2.62192	4.05066	2.68094	2.6928	2.89239	2.39485	2.42179	2.95339	2.35724	2.42883	2.02424	2.56197	2.51434	2.31284	2.34411	2.5806	2.21333	2.07986	2.42196	2.53471	2.45926	2.27759
MIF-AS1	2.24669	2.50123	2.15898	1.84169	2.52151	2.70843	2.75263	2.1719	2.29247	2.22218	2.29015	2.33375	2.52931	3.49413	2.9537	2.43244	2.32789	2.68295	1.92451	2.43294	2.03847	2.4006	2.59699	2.44065	2.20949	2.09193	1.93333	2.89889	2.07588	2.16653	1.99061	2.82704	2.22163	2.04539	2.86869	2.70861	2.46539	2.10312	2.36632	2.50523	2.44524	2.33402	2.2151	2.59973	2.13527	2.64382	2.64065	2.01892	2.72255
LINC01184	3.1814	3.14607	4.25135	2.90883	3.97704	3.55381	2.4388	4.34767	3.27861	2.91716	3.05007	3.40714	3.16723	3.67643	3.3886	3.16219	3.38049	3.56397	2.5772	4.15292	2.56261	3.19838	3.23081	3.4247	3.49894	3.42771	3.0119	3.5726	3.26334	3.36178	3.61552	3.31944	3.15873	3.447	3.28406	4.10312	3.70242	3.58342	3.8176	3.67887	3.37617	3.96657	3.22722	3.2447	4.0471	3.4508	3.99829	2.80119	4.02268
LPP-AS2	2.51061	2.7943	2.35307	2.6938	2.83441	3.30009	2.18619	3.16283	2.51158	2.54076	2.23822	2.56049	3.24642	2.71857	2.8955	2.67409	2.42646	3.50931	1.91174	2.74852	2.35744	2.27139	2.46115	2.63759	3.03907	2.97907	3.2026	2.83755	2.52076	2.6647	3.48383	2.63307	2.61946	2.43502	2.56729	2.78651	2.49445	3.23532	3.0695	2.52093	2.40269	2.66934	2.99509	2.73487	3.15071	2.78038	3.43625	2.70061	2.44858
HCG18	2.87449	3.24398	3.73924	3.22185	2.99341	3.37095	4.31351	2.9495	3.23714	2.54812	2.54981	3.05227	3.63299	3.38343	3.21464	3.45908	2.71158	3.15216	2.76817	2.81474	3.13822	3.38513	3.31959	3.18032	3.85035	3.42327	2.52957	2.88615	3.24323	3.1225	3.3352	4.01939	3.16812	3.28546	2.99413	3.61136	3.34223	3.48637	3.32068	2.93012	2.8547	3.39188	3.56399	3.48671	3.94288	3.31885	2.81475	3.74735	2.82209
MKLN1-AS	3.04072	2.72587	2.42926	2.90551	3.05241	2.18498	2.39758	2.41637	2.44101	2.26219	2.57309	2.63431	2.93609	2.53022	2.83133	2.44571	2.29027	2.51364	2.62582	2.84504	2.49248	2.54499	2.39576	2.49545	2.76913	2.40594	2.01802	3.05365	2.8115	2.40299	2.99669	2.62652	2.51602	2.9301	2.55757	2.9472	2.38288	2.62084	2.93662	2.3438	2.21167	2.85264	2.63424	2.63895	2.14163	2.27084	2.94836	2.48272	2.51986
C3orf36	2.31288	2.15149	1.89283	2.54228	2.30216	2.25252	2.11346	2.21549	3.061	1.97162	2.49122	2.30313	2.51502	2.34875	2.27055	2.47372	1.73926	2.03396	2.39407	1.97076	2.55258	1.86268	2.43438	2.27369	3.1488	1.81932	1.68278	2.48075	2.03083	2.44223	2.08586	2.89476	1.92122	2.36747	2.98388	2.62375	2.6316	2.17914	2.17527	2.10361	2.48507	3.09686	2.36393	2.06553	1.98566	2.06111	2.41954	2.02516	2.01872
NOP14-AS1	2.87285	3.50025	3.06925	3.02887	3.6445	3.62994	3.24943	3.62018	2.89981	2.95403	3.12126	3.08645	3.49967	3.58222	3.0911	3.20884	3.43101	3.14625	2.67455	3.98348	2.66267	2.67959	2.60868	3.07767	3.16487	2.95378	3.14423	3.44913	3.58956	3.12564	3.474	3.19625	2.66482	3.20408	3.59346	3.46543	3.60992	4.30652	3.40814	2.77014	2.9589	3.43429	3.68899	3.5139	4.50355	3.0865	3.1248	3.09863	3.3122
FENDRR	1.85618	2.16239	1.87102	1.81176	2.72728	1.85225	2.08217	1.90566	2.4874	1.66942	3.41884	1.89754	2.40135	2.6813	2.38756	1.92462	1.68034	2.24754	1.92268	2.2924	1.88398	1.83276	2.35378	2.98633	1.98485	1.92408	1.59375	1.99981	2.06362	2.38752	2.04874	2.92974	2.12545	2.65013	2.60194	2.15801	2.56944	2.21741	2.13639	1.96856	4.83257	2.35688	2.61071	2.06848	2.0328	2.06547	2.38934	2.05353	1.78415
FAM201A	1.94274	2.85787	2.31971	2.20857	2.44989	2.39793	2.16069	2.71964	2.2727	1.79135	2.43745	2.30071	2.29772	2.92459	2.23328	2.56882	1.9037	2.38849	1.70324	2.03814	1.96709	1.62396	2.90028	2.30548	3.18608	1.98823	2.324	2.66978	2.12416	2.48758	2.09958	2.55299	2.21952	2.08425	2.17573	2.04913	2.3043	2.54489	2.6048	2.58106	2.15628	2.41836	2.88409	2.20322	2.32254	2.59518	2.36415	2.99097	2.51071
KRTAP5-AS1	2.34121	2.27341	2.10709	3.02194	2.21309	2.37571	2.02524	2.48504	2.26678	1.77351	2.14222	2.59706	2.12291	2.11214	2.99954	1.90283	1.7115	2.9449	1.71822	2.1816	2.71464	2.49808	2.14529	2.12008	2.60768	2.32367	1.59112	3.26227	2.22097	1.90196	2.23063	2.54416	2.58807	2.09054	2.09782	2.85818	2.11791	2.41283	1.98913	2.27567	1.85836	2.17566	2.14708	2.98885	2.09719	1.90511	1.94744	2.49233	1.96434
PCAT7	1.97362	2.12656	2.13627	2.59528	2.21842	2.17189	4.11381	2.00811	1.89731	1.64001	1.93611	1.93228	2.14104	2.05591	3.03151	2.652	1.88799	2.70825	2.94583	2.419	1.91539	1.57221	2.24216	1.91416	2.5103	2.37018	1.51489	2.38241	1.98221	2.1892	2.42234	2.48966	2.15895	2.12515	2.00348	1.88897	2.0498	2.10905	1.93521	2.47629	1.90037	2.02529	2.19495	2.27775	2.02344	1.95786	2.16519	3.9609	2.04614
ARHGAP31-AS1	2.18016	2.59989	2.64814	1.80871	2.08865	2.2848	2.79755	2.01244	2.29786	1.84225	1.97003	2.08655	3.60536	2.29914	2.6059	2.56256	2.03163	2.75194	3.28093	2.14308	1.93609	2.27679	2.22493	2.12419	2.19605	2.54761	1.86963	2.83318	2.28852	2.21917	2.30494	2.6005	2.47345	2.52229	2.04016	2.06637	2.17155	2.77839	2.1341	2.19095	3.00273	2.55342	2.40886	3.22934	2.14769	2.8762	3.36257	2.83296	2.03678
DGCR11	2.78968	2.79282	2.68307	2.53818	2.53835	2.25249	3.30342	2.68492	2.64992	2.39437	2.50459	3.55623	3.00851	3.4686	3.75093	3.25687	2.25736	3.59724	3.14671	2.62936	2.4787	2.64568	2.73734	2.59796	3.07429	2.25946	1.99133	2.79679	2.97857	2.48946	2.71581	3.75011	2.47067	3.2104	2.6688	2.37166	3.87762	2.59042	2.84662	2.51737	2.8404	3.18955	2.84945	2.83284	3.08709	2.56338	2.9161	2.54847	3.18716
C10orf55	2.85473	3.07636	1.92928	2.17434	2.34491	2.18916	2.07274	2.39163	2.21609	1.88512	1.92719	2.1083	2.22791	2.19074	2.3809	2.18887	1.88105	2.64074	1.91506	1.97679	1.86098	2.23356	2.2869	2.00119	2.26625	2.04746	1.98509	3.00001	3.32571	2.20004	2.20303	2.50724	1.77894	1.99985	2.42316	2.09263	2.0389	2.0008	1.97421	2.71933	2.01947	2.16488	3.80461	3.58042	2.32119	1.95692	2.10331	2.08254	2.41729
NUTM2A-AS1	2.4731	2.93411	2.83297	2.72765	2.76149	2.10561	3.2958	2.75061	2.75598	2.24546	2.66986	2.79703	3.13831	2.78739	3.02591	2.91427	2.71157	2.80693	2.67226	2.87294	2.71225	2.5429	3.14813	2.83316	3.00607	2.92989	2.09206	3.22731	3.08875	2.6556	2.47422	3.85031	2.55489	2.67903	2.81082	3.03977	2.91131	2.59424	2.84411	2.78048	2.84115	2.69782	2.92017	3.07962	3.21629	3.04832	3.13554	3.49061	2.53924
DLEU2	2.44402	2.55135	2.48463	3.27416	2.52056	2.02445	3.81307	2.20181	2.87086	2.74603	1.99594	2.80151	2.65916	2.55128	2.47056	3.10432	2.33947	2.85486	2.3534	2.41008	2.43581	3.35092	2.50779	2.60432	2.66191	3.12448	2.9666	3.33157	3.19398	3.42592	2.08688	2.40643	2.12495	2.38337	2.48599	2.39645	2.61391	2.31351	2.46228	2.37446	2.51803	2.20273	3.17182	3.18076	2.69968	2.78057	3.01877	2.9373	2.03316
TMEM254-AS1	2.45935	2.10944	2.50051	2.37716	2.71184	3.01796	3.10446	2.53648	2.26	2.78165	1.84001	2.14443	2.27416	2.26096	3.50632	2.1564	2.59811	3.36662	2.06782	3.49256	2.19745	2.07603	2.14771	2.24977	2.05205	2.19541	1.94743	2.16045	1.99624	1.91439	2.3361	2.69231	2.09101	2.1272	2.26363	2.73253	2.15572	2.5351	2.24813	2.10613	2.14908	2.57465	2.12728	2.63884	2.66443	2.32609	3.57993	2.1494	2.11567
HCG15	2.0015	2.30319	3.38508	1.98488	2.48235	2.88227	2.76743	2.13708	1.97366	1.65684	1.90507	2.6032	4.31667	2.10841	2.64279	2.30029	1.71681	2.2711	2.38806	2.45707	1.89822	2.05032	2.14077	2.34407	2.1369	2.1492	1.67747	2.14599	2.25301	2.61426	2.21061	2.31255	2.06149	2.47461	2.08733	2.16956	2.22328	3.45825	2.32746	2.10461	1.92142	2.61321	2.53241	3.38022	2.80862	2.29659	2.86056	3.01281	2.04687
ERICD	2.45185	2.42717	2.24508	2.14652	2.79852	2.92492	2.23631	2.36479	2.43053	2.30927	1.90074	2.46623	2.75132	2.51626	2.37847	3.15147	2.28689	3.257	2.39096	2.2545	2.19851	2.13721	2.34051	2.06389	3.20627	2.86529	2.02719	2.59245	2.30778	2.96014	2.31686	3.06057	1.93755	2.0916	2.42638	2.29186	2.36546	2.76341	2.13104	2.37964	2.22921	2.29894	2.73058	2.83922	2.67029	2.65966	2.34431	2.61145	2.36161
LINC01460	2.87263	2.80191	1.87757	2.18818	2.01234	2.17387	2.03581	2.29973	2.08845	3.10069	1.74256	2.42453	2.14133	2.60339	2.38366	1.93718	1.75757	2.2559	1.70324	2.03991	3.27736	2.75433	2.00169	2.11932	2.01221	3.53931	2.57505	2.97621	1.89267	2.31907	2.19031	2.23874	1.79044	2.01793	2.17947	2.37437	1.97807	1.85962	1.90743	1.91243	1.82251	2.15747	2.87344	2.91222	3.84043	1.87773	2.05323	1.92536	2.176
ST20-AS1	2.22888	2.40033	2.40407	1.98447	2.67013	2.4829	2.41355	2.3173	2.85844	2.51897	2.62287	2.23757	2.41421	2.72088	2.8362	2.50122	2.23056	2.36952	1.88463	2.22848	2.09511	1.97815	2.45842	3.32494	2.61815	2.196	1.93613	2.39571	2.60524	2.72778	2.14027	3.01441	2.13852	2.86087	2.86459	2.64251	2.77004	2.74769	2.52839	2.33187	2.57147	2.66654	2.64984	2.64927	2.67313	3.22307	2.62021	2.59228	2.95886
SAMD12-AS1	2.16566	2.58665	2.60847	2.35968	2.42631	2.20263	2.33449	2.52198	2.21108	2.18532	1.94016	2.82018	2.44644	2.61919	2.51549	2.94349	2.01732	2.46713	2.30854	2.78069	2.09843	3.34919	2.74547	2.23174	3.27919	2.68817	1.74955	2.40535	2.34482	1.9852	2.55181	2.58707	2.04567	2.32677	2.05957	2.14251	2.53331	2.29518	2.20041	2.54819	2.08735	2.32782	2.17434	2.70085	2.45523	1.95124	2.16324	3.21575	2.39823
SRD5A3-AS1	2.15168	2.16778	1.99217	2.61551	3.72096	3.0468	2.07735	2.36533	2.32829	2.26802	2.29346	2.2267	2.09218	2.5958	2.60632	2.35855	2.21353	4.11614	1.79858	2.11664	1.86624	2.96695	2.23876	2.20674	2.6145	2.35794	1.70048	2.27785	2.10607	2.1249	2.31781	2.45608	2.08712	2.14644	2.34306	2.24419	2.20706	3.02153	2.12263	2.13274	2.32381	2.24575	2.48622	2.29758	2.6755	2.02967	2.26931	2.05078	4.03327
LINC01186	2.28422	2.93402	1.874	2.28707	2.43182	2.09218	2.02524	2.13002	2.0049	1.89489	2.15171	2.04747	2.51684	2.10648	3.26359	1.90283	2.31611	2.9416	1.77206	2.27918	1.76557	1.65812	1.96223	1.98362	1.93675	2.72997	1.49596	3.07908	2.23951	1.92279	2.70921	2.07866	1.74762	2.35946	2.15111	2.80739	2.09719	2.15484	2.09528	1.79047	2.73792	2.30282	3.0508	2.47298	2.48799	2.9397	2.56906	1.91419	1.99584
TMPO-AS1	2.23841	2.45115	2.98943	2.27401	2.33588	2.32443	2.44576	2.11462	2.28618	2.27484	2.01735	2.25431	3.25426	2.22094	2.341	2.83516	2.48814	2.68051	1.96678	2.23577	2.2405	1.84599	2.20788	2.19064	2.46201	2.59312	2.78706	2.66501	2.62988	2.58142	1.95875	2.27202	1.9409	2.24198	2.55307	2.12161	2.06292	2.35725	2.23374	2.53089	2.13576	2.38046	2.88973	2.58025	2.56128	3.15567	4.23173	3.13504	2.15909
SAPCD1-AS1	2.05067	2.3671	2.36042	2.29495	2.55594	1.93442	2.08962	2.11877	2.06163	1.71741	2.05918	2.4508	3.02631	2.12941	2.96862	2.23808	1.87012	2.69727	1.92462	1.9006	1.72905	2.05947	2.03145	2.1726	3.00671	2.07164	1.71844	2.17097	2.01464	2.1549	2.44846	2.37113	2.00692	2.41727	1.97199	2.35472	2.75669	2.366	2.21194	2.25004	1.82573	2.45723	2.27459	2.53156	2.6234	2.84136	2.55703	1.98212	1.97258
SP2-AS1	2.35302	2.90351	2.61175	2.62206	2.38194	2.7477	2.60095	2.67655	2.40773	2.17406	2.1188	2.60814	3.02006	2.83427	2.61202	2.34001	2.35378	3.30935	2.63853	2.61095	2.65054	2.55347	2.47346	2.52753	2.41012	2.33542	1.79557	3.00678	2.57764	2.57193	3.17468	2.58525	2.63461	2.73001	2.43111	2.59158	2.33565	3.0334	2.82108	2.23158	2.14465	2.34972	2.55126	3.22966	3.10385	2.63945	2.41747	2.42163	2.288
LINC01521	2.15719	2.62277	2.44835	2.17155	2.19232	2.64868	2.33349	2.04711	2.29752	1.76827	2.16587	2.5453	2.75082	2.22742	2.88768	2.35018	1.72733	3.14122	1.71455	2.03612	2.01949	1.97306	2.34431	2.2775	2.35886	2.24199	1.73717	2.22693	2.14693	2.32145	2.40886	2.45213	1.92664	2.66364	2.3377	2.41116	2.15066	2.49994	2.71697	2.15072	2.12447	2.3171	2.35799	2.51064	2.53499	3.33638	2.61942	3.26795	2.08313
LINC01535	2.3968	1.94382	1.86865	2.23159	2.07909	2.67418	2.62879	1.89885	2.02814	2.38417	1.78164	1.88307	2.14475	1.92871	2.47608	2.30662	1.7192	2.17627	2.70816	2.22268	2.51689	2.35209	2.07019	1.90848	2.10847	3.26132	2.00365	2.46883	2.0862	1.91117	2.43249	2.11418	2.34301	2.48751	2.08484	2.01727	1.90737	1.95047	1.92582	3.97151	1.92071	2.1917	2.60903	2.34916	3.02824	2.2814	2.01921	3.37794	2.11342
MAST4-AS1	2.27721	2.15664	2.68568	2.16414	2.48541	2.62915	2.40134	2.9613	2.25446	2.52671	1.91788	2.04101	2.51303	2.48862	3.19838	2.05451	2.25545	2.97735	1.83864	2.12479	1.81578	2.49338	2.0037	2.52098	2.17296	2.68394	1.95637	2.66892	2.17183	2.09428	2.85525	2.14799	1.86773	2.08014	2.38631	1.99792	2.26337	2.18094	2.73322	2.45771	2.12928	2.62785	2.4333	2.18654	2.04956	2.40249	2.92024	2.91506	2.53663
UGDH-AS1	2.37194	2.55523	3.29382	2.7485	2.64372	3.24476	2.70681	3.05962	2.43714	2.45137	2.25492	2.12182	3.29593	2.61297	2.46322	2.78791	2.09609	2.88213	2.18354	3.71336	2.55881	2.29972	2.5858	2.58294	2.74364	2.83919	2.33496	2.81695	2.27014	2.55421	2.69109	3.29472	2.10177	2.46385	2.37347	2.77694	2.35097	3.10602	2.93672	2.45675	2.48871	2.89137	2.35057	2.73778	3.76241	2.42503	2.53338	2.81669	2.39067
LINC00885	1.89137	2.07097	2.03418	1.92713	2.22005	2.47486	2.05807	2.77492	2.13265	1.85979	1.97627	2.07253	2.18359	2.31586	1.98062	1.95622	2.06763	3.90256	1.83024	3.26444	1.74166	1.64402	2.10675	2.06088	2.12935	2.11506	4.27632	2.09795	3.67987	1.93897	2.77039	2.14704	1.85503	2.09638	2.12067	2.32673	2.18976	2.64292	2.84528	2.08613	2.2233	2.74035	2.17789	2.21068	2.98533	1.86808	2.16395	2.32377	2.26733
FUT8-AS1	2.36809	2.59311	2.46134	2.11295	2.13288	3.01503	2.28061	2.07007	2.66449	2.07403	2.24267	2.27423	2.1869	3.13434	2.22766	2.39623	1.75565	2.04394	1.81484	2.11069	1.83186	2.02092	2.31342	2.31022	2.90705	2.5721	1.76158	2.16749	2.04704	3.13099	2.62722	2.60185	1.79699	2.3437	2.02595	2.15289	2.31114	4.58	2.34089	2.54072	1.98573	2.31366	2.83759	2.49409	1.99116	2.20781	2.08202	2.93064	2.29544
DNMBP-AS1	2.08645	2.64411	2.10975	2.15085	2.45103	2.18337	2.34966	2.33715	2.09996	2.02463	2.23181	2.3117	2.50738	2.35524	2.63854	2.42401	2.12272	2.40118	3.01702	2.18778	2.0076	1.74307	2.77105	2.29273	2.54024	2.42045	2.0874	2.98699	1.88519	2.12274	2.29996	3.18144	2.53794	2.21937	2.23764	2.45981	2.45642	2.42107	2.67067	2.43242	1.94499	2.35684	2.46269	2.66095	1.95549	2.17831	2.27438	2.10667	2.57226
LINC01376	2.25059	2.11866	2.86485	2.21909	2.61754	2.42219	2.53722	2.96616	2.32788	2.26094	1.96325	2.55935	2.15957	2.26226	2.5342	2.37141	2.03174	2.5216	2.09809	2.66747	2.01838	2.18566	2.68139	2.13129	2.58289	2.31855	1.69818	2.25257	2.15349	2.36971	2.23605	2.72003	2.21016	3.16666	2.03562	2.63369	2.87975	3.13829	2.098	2.17685	2.12185	2.22949	2.59981	2.72826	2.35335	2.08129	2.33642	2.43533	2.22246
ENTPD3-AS1	2.40196	2.56529	2.28379	2.56033	2.55004	2.48969	2.64147	2.98533	2.49153	2.70394	2.43481	2.50693	2.90774	3.00554	2.53453	2.61141	2.38788	3.30033	2.50107	3.83376	2.53473	2.09111	2.47679	2.78001	2.62563	3.57351	2.51233	2.60035	2.65523	2.56018	2.95063	2.74398	2.59385	3.01094	2.7022	2.90918	2.55969	2.65669	2.90161	2.31869	2.93191	2.64998	2.30665	2.48274	2.77479	2.26651	2.8703	2.38963	2.37573
LINC00863	2.07931	2.31157	2.4809	2.18555	2.4048	2.10423	2.62781	2.22395	2.36008	1.85526	2.28414	2.3695	2.67812	2.43196	2.62033	2.26238	1.93229	2.60422	2.10993	2.35785	2.09426	1.95545	2.48605	2.51025	2.53061	2.55386	1.67946	2.43439	2.27827	2.30142	2.14508	3.46973	2.04859	2.84966	2.33646	2.67968	2.48406	2.33797	2.6132	2.30503	2.24956	2.52199	2.35951	2.7741	2.67734	2.52706	2.55974	2.4055	2.32309
ARHGEF38-IT1	2.67522	2.04663	2.36524	1.89885	1.9787	1.97548	2.02524	2.05716	2.19937	2.41394	1.7365	2.84188	2.36746	2.88374	3.06134	2.28383	1.73906	1.96042	2.22523	1.90144	1.72905	3.20389	2.52009	3.30768	2.35553	1.89816	2.05373	3.54337	1.8515	2.10943	2.02849	2.22706	1.8279	2.10302	2.37065	2.03252	2.16586	2.79081	1.94797	2.10642	2.39241	2.24095	2.09187	2.53602	2.38801	2.17085	2.30393	2.17117	2.16054
LINC00920	2.02786	2.82505	2.16799	1.92217	2.44856	2.63736	2.0807	2.49929	2.44445	1.80326	2.50457	2.01715	2.58536	2.59073	2.13768	2.31316	2.17524	2.25554	1.76361	2.20265	2.11473	2.35565	2.26346	2.11908	2.1476	2.73613	1.68905	2.33989	2.10586	2.1656	2.33675	2.54922	2.08843	2.18426	2.41553	2.04222	2.26182	2.08432	2.41549	2.2129	2.70212	2.36986	2.64701	2.28661	2.24356	4.10382	2.35509	2.16071	2.46155
ZNF561-AS1	2.39587	2.70635	3.0296	2.60877	2.65959	2.55936	3.09995	3.36762	2.50554	2.38913	2.17004	2.68087	3.09561	2.83351	2.62746	2.61952	3.12465	2.99586	2.31837	3.59027	2.44034	2.55393	2.56669	2.46244	2.45461	3.30175	2.22423	3.00208	2.94327	2.49691	2.93174	2.83667	2.44555	2.50281	2.44943	2.77184	2.78804	2.99232	2.60473	2.90712	2.34089	2.58503	2.70055	2.76311	3.05191	2.59636	2.3645	3.52593	2.71661
ABALON	2.21829	3.19872	2.36454	2.07643	2.09609	1.9644	3.85905	2.11203	1.98492	1.65429	2.37296	2.20248	2.70429	2.05512	2.45941	2.74815	1.70164	2.18677	1.77117	2.41114	1.89006	2.04366	2.5473	2.07524	2.09118	1.91472	1.58631	2.38608	2.2978	2.65607	2.05336	2.44072	1.81544	2.25969	2.18286	2.09972	2.17922	2.29591	2.1054	1.99583	1.90359	2.20532	2.81278	2.31405	2.28627	3.3519	2.35621	3.05368	1.89573
LINC00866	1.89274	2.22464	2.51803	2.14006	1.93448	1.99947	2.02524	2.14093	1.9216	1.6685	1.68322	2.29607	2.21782	2.06167	2.62373	1.90283	1.91789	1.97397	2.49538	1.82155	1.88633	1.80653	2.90452	2.10619	2.30851	2.101	1.9478	2.42696	1.94374	2.13172	2.04765	2.21003	2.06249	1.96979	1.98045	2.04673	1.895	2.58141	1.9533	3.03612	2.03576	1.9888	2.14136	2.60885	1.92753	2.02696	1.94752	1.91419	2.39189
BAALC-AS1	2.32273	2.43186	2.09866	2.36825	2.25942	2.242	2.71028	2.50786	2.34729	1.75006	2.0077	2.20223	2.66868	2.21935	2.53266	2.18176	1.78907	2.76113	1.93411	2.699	2.15957	2.25797	2.44199	2.08771	2.57695	2.52644	1.55206	2.34241	2.34282	2.25044	1.97331	2.66727	2.08293	2.36383	2.24437	2.65567	2.32254	2.29612	2.5051	1.99175	2.18551	2.23203	2.45591	2.9497	3.29669	2.48053	2.80288	2.47011	2.34549
PINK1-AS	2.61015	2.95342	2.51312	2.6834	2.72715	2.85968	2.85815	3.11413	2.84303	2.53642	2.58529	2.50176	3.19565	2.608	2.66135	3.23625	2.44679	2.97136	2.18787	2.80834	2.50134	2.21039	2.93784	2.59932	2.60048	2.15283	2.18522	2.91819	3.14996	2.35283	2.62507	2.85414	2.83303	2.72945	2.829	3.11466	2.74399	3.07223	3.0769	2.55112	2.54865	2.78025	2.73219	3.1575	3.21786	3.37221	2.77877	2.5744	2.31493
ACTA2-AS1	2.49506	2.29846	1.91734	2.61148	2.5216	2.57365	2.05356	1.98557	3.77038	1.82718	2.02132	2.00935	2.00344	2.19302	2.2982	1.98627	1.86192	2.48564	1.90955	1.99853	2.26886	2.51053	2.13618	2.16415	2.02452	1.78668	1.83031	2.07877	2.99803	2.21911	2.51473	2.27997	2.13819	2.2423	2.79934	2.08455	2.08659	2.08175	2.12961	2.31508	2.27949	2.36505	2.20119	2.11294	2.05631	2.46801	2.30494	2.20515	1.99178
LINC00839	2.02253	2.33061	2.08359	2.02554	2.46424	2.14414	2.57032	1.89787	2.63549	1.63988	2.37619	1.94875	2.32215	2.03907	2.19238	2.02512	1.83713	2.09632	3.07981	3.28961	2.37347	2.35404	2.31424	2.26857	2.75422	1.97512	2.36171	2.04813	2.42114	2.27652	1.92293	2.30517	2.01724	2.12947	2.43914	2.07903	2.56984	3.41858	2.33601	3.04626	2.85677	2.38337	2.25758	4.17039	2.25445	2.06412	2.42176	4.44862	2.00777
LINC00662	2.46627	3.11014	3.12383	3.42829	2.30876	2.55406	2.53415	2.5344	2.4742	2.19647	2.09445	2.28883	2.13056	2.52647	2.34409	2.57081	2.52931	2.62346	2.60809	3.60825	2.83441	2.56475	2.77335	2.72193	2.47054	4.04808	1.92442	2.42328	3.04905	2.73893	2.35256	2.87098	2.12528	2.61331	2.78646	4.44078	2.45412	3.0779	2.64522	3.41538	2.41101	2.5208	3.07781	2.67538	5.97914	2.57214	2.73671	3.29757	2.35142
ALMS1-IT1	2.888	2.3729	2.29608	2.55206	2.34934	1.90516	3.78071	2.29727	2.19793	1.90786	1.84946	2.62238	3.16913	2.25357	2.20168	2.27507	1.80485	2.5536	2.18029	2.00494	2.76547	1.94701	2.0813	2.00027	2.72661	2.04439	1.84075	2.45515	2.90392	2.41561	3.00455	2.28807	1.98637	2.94298	2.25634	2.27354	2.48912	2.34998	2.05067	2.01072	2.08811	2.07766	2.45852	3.00906	2.06906	2.72024	3.10579	2.772	1.97525
ZBTB11-AS1	2.89448	2.52028	2.62225	2.30826	2.46135	2.59673	3.16545	2.72076	2.52437	2.30854	2.39508	2.72274	3.09774	3.22736	2.86422	2.65523	2.80522	3.33463	2.76855	2.66562	2.24805	2.16071	2.45258	2.68275	2.53083	2.85944	2.61829	2.77724	2.88454	3.12287	2.82193	2.79167	2.50666	3.30592	2.6549	2.75644	2.718	3.09933	2.85806	2.43497	2.64066	2.87129	2.59235	3.52841	3.12663	3.12779	2.77632	2.71111	2.72686
DNAH10OS	2.04127	2.04316	2.0337	3.0042	2.78672	1.98108	2.06092	2.0204	2.23254	1.64262	1.95946	2.17775	2.12045	2.49516	3.55785	2.17198	1.68721	2.24209	1.95926	1.9831	2.0926	2.01456	2.13617	2.51111	2.24083	1.99211	1.53931	2.01557	2.1242	1.92227	1.86495	2.78908	2.09467	2.80374	2.31026	2.27953	2.13303	2.32909	2.42687	2.28417	2.16406	2.32364	2.43123	2.55562	2.15135	3.15748	3.01091	2.20687	2.31044
ACVR2B-AS1	2.15641	2.31611	2.74933	2.35263	2.05445	2.68188	2.85494	2.56376	2.46982	1.87605	2.18479	2.228	2.29481	2.30906	2.26015	2.29773	1.91702	2.69403	2.04501	2.05466	2.07861	1.83003	2.34251	2.24121	2.81805	2.60118	2.16168	2.37091	2.02983	2.10406	2.33285	3.0957	2.02668	2.29448	2.34898	2.18922	2.19598	2.48169	2.61322	2.29714	2.26384	2.48617	2.09874	2.43163	2.23867	2.24947	2.51727	3.08099	2.00466
CCNT2-AS1	2.47734	2.72254	2.68073	2.42646	2.49753	2.35846	3.30818	2.31227	2.66629	2.18922	2.18375	2.78052	2.57784	2.65687	3.25541	2.28457	2.02972	2.08645	2.83618	2.84101	2.4842	2.51386	3.19161	2.72156	2.73798	2.66525	2.36607	2.91524	2.16487	2.51701	2.37398	2.75548	2.37659	3.12147	2.53592	2.42161	2.37347	2.81363	2.50281	2.21985	2.70809	2.43766	2.4882	2.57082	2.67451	2.19025	2.53402	2.87957	2.3148
EGOT	2.18196	2.45155	2.17454	1.96184	2.57594	2.00508	2.02524	2.16461	2.0274	1.81763	1.79696	2.11732	2.1664	2.66054	1.97333	1.90283	1.68923	1.90279	2.07336	2.82939	1.80603	1.89002	2.15038	2.28847	2.03898	2.829	1.69384	2.08229	2.03031	1.97985	2.80091	2.17526	2.6968	1.99564	2.13905	2.26373	2.0194	2.65992	2.29974	2.04834	1.93909	2.40543	2.17074	2.5726	1.93875	1.86225	2.30277	1.91419	1.80028
MIR646HG	1.88514	2.00856	2.26623	2.80372	2.5288	2.01915	2.13334	2.43933	1.954	2.44359	1.83405	2.09164	2.80198	1.99438	1.94715	1.97364	1.65539	2.02523	1.75388	1.97366	1.83755	1.71026	2.03966	2.14088	2.18571	1.93604	2.27941	2.07634	2.31766	2.07693	1.99805	3.07897	1.71705	2.60332	2.00748	2.87017	2.05505	3.10817	1.93086	1.82369	1.8463	2.26226	2.40184	2.57446	2.03274	1.83711	1.99004	2.18126	1.95704
RBMS3-AS3	1.87909	1.97	1.8748	2.33898	2.21824	2.09974	2.02524	2.26695	2.0622	2.14483	2.0704	2.03167	2.07386	2.22479	1.95864	1.90283	1.67464	2.7321	1.77348	2.97751	1.87273	1.67337	2.04008	2.02362	1.97245	2.85709	1.49596	2.20041	2.19646	1.92453	1.85936	2.22554	2.09604	2.07005	2.07198	1.9092	2.17606	2.0042	2.31784	2.02417	2.07349	2.15403	2.12995	2.34191	3.12074	2.09154	2.15276	1.96557	1.87138
IQCH-AS1	2.09112	2.52429	2.38473	2.18578	2.56839	2.5405	2.63109	2.77157	2.40768	2.01427	2.39658	2.20718	2.48641	2.40419	2.40879	2.58216	2.51875	2.73322	1.99854	2.89932	2.3351	2.13657	2.49093	2.42395	2.63118	2.41362	1.871	2.38697	2.23826	2.12668	2.44117	2.81392	2.07304	2.35427	2.50949	2.609	2.46453	2.66427	2.61487	2.25664	2.3942	2.66124	2.45162	2.3634	3.58501	2.80123	2.52884	3.42462	2.59697
BDNF-AS	2.16358	2.28659	2.00771	2.13116	2.28717	2.43657	2.48812	2.97226	2.2084	2.12409	2.05066	2.10344	2.79097	2.38831	2.33646	2.3224	1.84918	2.8072	2.06756	2.78332	2.297	2.03226	2.41423	2.39934	2.13117	2.35919	1.58259	2.23196	2.40399	1.93031	2.13273	2.30822	2.11941	2.38288	2.38135	2.52924	2.29939	2.80264	2.55862	2.13775	2.32657	2.88628	2.2506	2.66019	3.17132	2.22349	2.32242	2.44765	2.80398
SAP30L-AS1	2.14293	2.27942	1.97652	2.6518	2.17857	2.32312	2.11475	2.64728	2.34669	2.12839	1.91464	1.93526	2.16222	2.4156	2.35372	2.13516	1.79619	1.95783	2.2157	2.2032	1.86348	1.99325	2.35838	2.43397	2.78023	2.02322	1.69524	2.27429	2.56848	2.265	1.96198	2.39654	3.06814	2.21823	2.25491	2.63736	2.05155	2.4984	2.69155	2.12795	2.13788	2.47925	2.36106	2.28696	2.10068	2.0282	2.03192	1.99328	1.91087
TNKS2-AS1	2.06155	2.0063	2.01566	1.85179	2.13273	2.34192	2.10288	2.33542	1.93	2.06742	1.74684	2.65061	2.67138	2.14699	2.29887	2.72634	2.08011	3.19825	1.8931	3.23937	1.95397	2.04141	2.18103	2.49064	2.07544	2.26837	2.94874	2.2193	2.54436	2.0992	2.39988	2.29938	2.16254	2.22934	2.03783	2.06337	2.24239	2.83629	2.15505	2.07449	1.90363	2.90085	2.26295	2.59577	2.07176	2.73589	3.06653	2.21713	2.21847
KTN1-AS1	2.18179	2.26918	2.44452	2.08357	2.36193	1.9794	3.64147	2.02604	2.22038	1.83867	1.92364	2.46111	2.68456	2.04154	2.68545	2.38098	2.20774	2.50565	2.1027	2.72759	1.82256	2.61594	2.27933	2.18049	2.29989	2.13071	1.74469	2.18436	2.20353	2.40113	2.23191	2.53982	2.06007	2.59728	2.20747	2.06113	2.01809	2.25614	2.45769	2.37619	1.98267	2.34098	2.55282	2.72842	2.34656	2.76511	2.62566	3.33067	2.30663
LINC01550	1.91752	2.01934	1.95908	1.79466	2.66038	2.65172	2.04584	2.22966	2.33331	1.64872	1.94554	2.20407	2.05558	2.85258	1.9959	2.01715	1.70048	1.93593	1.72198	3.16644	1.82845	1.83568	2.1579	2.19029	1.97414	1.99896	1.55901	1.93932	1.89837	2.01741	2.18268	2.1113	2.57921	1.99993	2.21533	2.27448	2.03647	2.71617	2.72543	1.99376	2.02581	2.40797	2.16504	2.10021	2.48422	1.90526	1.99623	2.24138	1.87785
WDFY3-AS2	1.96956	2.57801	2.1162	2.04463	2.51829	1.96082	2.20013	2.17485	2.13617	1.87782	1.96503	2.08791	2.2459	2.12277	2.62008	2.07984	1.88384	2.26816	1.96589	3.49662	2.00662	2.00644	2.29702	2.48601	2.11779	2.00204	1.68032	2.40615	1.99205	2.02716	2.10046	2.35658	2.19186	2.5731	2.21415	2.50785	2.38439	2.25422	3.21695	1.88411	2.17641	2.42145	2.30203	2.46579	2.90113	2.19875	2.61237	2.08923	1.95235
LINC00992	1.7348	3.46716	3.49811	1.77844	1.91989	1.69986	2.02524	2.26853	1.83348	1.60601	2.01082	1.83876	2.15608	2.18496	1.9602	2.37952	2.35096	2.64764	1.81454	1.82155	1.72905	1.56554	2.76362	2.0748	2.27987	2.61372	1.51522	2.26329	1.8515	1.83845	2.22518	2.04178	2.33895	2.01362	2.0533	2.00029	2.23235	1.92338	2.63324	2.62294	1.76605	1.91278	2.0105	2.47889	1.98406	1.87035	2.57273	3.42301	1.74226
CYP4A22-AS1	2.20474	2.32762	2.2856	1.97209	2.11358	2.4227	2.18126	2.17978	1.91369	2.32226	2.01753	2.10302	2.19695	2.08992	1.93658	2.41908	2.19657	3.09423	2.04311	2.17985	1.75397	2.14182	2.04834	1.98648	2.7581	2.20951	2.17486	2.46001	2.1615	2.60031	2.09491	2.19413	1.8937	2.11433	2.30246	2.37577	2.08802	2.5407	2.0044	2.02377	1.85014	2.08095	2.35864	3.054	2.01438	1.90192	2.05146	2.48239	2.63567
LIFR-AS1	1.99688	2.01813	2.62968	2.39143	2.20304	2.33406	2.17764	2.47387	2.10439	2.09627	2.00012	2.07011	2.50021	2.30477	2.77295	2.5105	1.8203	2.6714	1.92353	2.06442	1.89207	1.97849	2.18738	2.24799	2.1467	2.75497	1.91251	2.07187	1.92013	2.33067	2.32723	2.2973	2.19239	2.16562	2.02282	2.40414	2.09385	2.66514	2.26621	2.06952	2.36867	2.5333	2.63564	2.19119	2.00621	1.87486	2.09335	2.44497	2.47739
MBNL1-AS1	2.0954	2.11306	1.96957	1.97082	2.24766	2.18554	2.17401	1.94115	2.39104	1.66557	2.1779	2.15221	2.30035	2.08372	2.1657	2.03614	1.76337	2.22126	1.89436	2.01304	1.93207	2.08257	2.11517	2.30688	2.06235	2.12267	1.60616	2.02503	2.3176	2.02414	2.19345	2.2576	1.98398	2.23401	2.35142	2.22155	3.7915	2.2076	2.39987	1.99837	2.54376	2.36436	2.23299	2.98249	2.16696	2.01243	2.36071	2.23196	1.92618
RAP2C-AS1	2.27668	2.28853	2.20386	2.10977	2.35454	2.47824	2.35388	2.24009	2.4941	1.73588	2.07867	2.13592	2.30528	2.35837	2.49252	2.07491	1.75245	2.66471	1.86814	2.27271	1.91897	2.10918	2.16059	2.38073	2.05115	2.44906	1.61625	2.74607	2.11804	2.02566	2.26935	2.83395	2.36585	2.55865	2.25263	2.39888	2.36335	2.18405	2.33847	2.50782	2.13309	2.58215	2.2117	2.6706	2.49473	2.3095	2.35978	2.50191	2.56041
RUNDC3A-AS1	2.27135	2.20874	2.06793	1.95761	2.25161	2.21182	2.29591	2.44204	2.40142	1.76713	1.77635	1.99402	2.33114	2.2023	2.18396	1.94812	1.7283	2.6693	2.10974	2.10399	1.74185	1.74028	2.45251	1.87545	3.05518	1.93902	1.69145	2.56759	2.06356	2.26262	2.24667	2.08659	1.81321	2.0047	1.95985	2.31092	2.40274	2.85599	2.06291	1.99774	1.94807	2.04552	2.36842	2.3703	1.9726	1.95973	2.0333	2.24194	2.9795
LINC01132	2.08189	2.12423	2.32555	2.73323	2.5756	2.33649	2.0647	2.3334	2.21798	2.37159	1.83777	2.29557	2.24054	2.03032	2.35468	1.95433	1.7887	2.21082	1.74904	2.18612	1.86303	2.40366	2.17425	1.97002	2.28304	2.47678	2.07561	2.45857	2.24421	2.00096	3.09658	2.85806	1.88162	2.08581	2.13092	2.67715	2.11393	2.31164	2.17403	2.6427	1.94857	2.76234	2.28879	2.2611	2.11863	2.01037	2.07748	1.93933	2.4934
LINC00862	1.87351	2.01575	2.01746	1.96182	2.22179	2.66138	2.26354	2.29703	1.99682	1.7297	1.72488	2.04701	2.14407	2.39102	2.53179	2.25282	2.43959	2.67767	1.74043	1.9044	1.78082	2.05217	1.98987	1.85771	2.14756	1.93951	1.67387	1.97115	1.87398	2.85203	1.88258	2.20172	1.74442	2.00556	2.029	2.19246	1.91038	3.00119	2.0098	1.90195	1.8809	2.5641	2.2034	2.22776	1.95541	1.88148	3.06238	2.25408	2.74307
LINC00630	2.28722	2.56395	2.50195	2.59349	2.41517	2.29934	2.30824	2.3397	2.36512	1.83835	2.01765	2.13396	2.57874	2.44156	2.31382	2.32751	1.89065	2.56215	2.18616	2.30165	1.99299	2.62614	2.38342	2.37547	2.56549	2.13584	1.75882	2.37073	2.32225	2.22767	2.09933	2.66495	2.13251	2.37066	2.30473	2.32901	2.45203	2.82141	2.35713	2.53543	2.06644	2.29565	3.20677	2.99107	2.63064	2.48552	2.31417	2.99663	2.3792
OGFRP1	2.3618	2.54641	2.16396	2.22705	2.62001	2.00768	2.30914	2.04777	2.02902	1.94834	1.93317	2.12755	2.55196	2.14502	2.78511	2.70854	1.96936	2.35246	1.84779	2.4415	1.99099	1.73603	2.12202	2.1582	2.6461	1.90484	1.78579	2.39935	3.1416	2.28592	2.42374	2.32062	1.96178	2.30491	2.29557	2.07236	2.21304	2.72305	2.4664	2.03791	1.91186	2.35833	2.56139	2.79904	2.79712	2.46477	2.79235	2.36588	2.02348
WEE2-AS1	1.91547	2.26197	1.98704	1.92835	2.14144	2.3414	2.04246	1.94466	2.27778	1.87934	2.03277	2.03711	2.30078	2.13452	2.27168	1.95849	2.58774	2.63443	1.74665	1.92467	2.00487	1.85425	2.25278	2.11271	2.0107	2.89497	1.75591	2.02301	2.10127	1.97175	2.06438	2.37256	2.34077	2.51158	2.19182	2.02532	2.26867	2.79111	2.46453	1.99852	2.09951	2.26595	2.3702	2.24469	2.87101	2.47676	2.47822	2.97403	2.00607
SGMS1-AS1	2.18338	2.32247	2.09643	2.20162	2.49943	2.09634	2.08273	2.33275	2.22947	1.8873	2.02416	2.08575	2.41711	2.2943	2.13128	2.37769	1.94622	2.50115	1.83229	2.38387	2.03678	1.72978	2.25753	2.26434	2.43804	2.00338	1.67224	2.29134	2.22503	2.02311	2.4281	2.58422	2.06744	2.76615	2.22284	2.53332	2.39015	2.52292	2.70989	2.05999	2.21397	2.26102	2.2137	2.64045	2.43588	2.33423	2.66337	2.05432	2.03014
LINC01128	2.76699	2.52796	2.50383	2.74192	2.84726	2.5598	4.77331	2.42401	2.74947	2.47972	2.52303	2.49616	2.82414	2.58636	2.92747	2.6764	2.12253	2.51003	2.44178	2.61174	2.41923	2.27498	2.8258	2.4733	2.38554	2.3601	2.19641	2.85726	2.74655	2.5771	2.47013	2.97469	2.6453	2.66127	2.61635	3.08912	2.59856	2.99767	2.80829	2.77646	2.63033	2.87427	2.84312	2.49724	2.84281	2.78938	2.57728	2.70492	2.47698
LINC01558	2.07154	2.90118	1.92358	2.00818	2.20952	2.38755	2.06705	2.07423	2.29848	1.84083	1.99335	2.10699	2.27334	2.10161	2.71682	2.00348	1.73241	2.34377	2.07301	2.17575	1.85304	1.81737	2.5588	2.23158	3.00859	2.52002	2.14958	2.1757	2.05854	2.19572	2.01158	2.30264	2.07872	2.11631	2.1678	2.20916	2.02796	2.60847	2.1598	2.35245	2.18422	2.42709	2.30692	2.26053	2.30412	1.91163	1.9937	2.13541	2.18883
FIRRE	1.89264	2.41609	2.05838	1.99588	1.94211	2.78368	2.16351	1.92322	1.93369	1.60601	1.77333	1.87667	2.61184	2.3634	1.95966	2.77901	2.03217	2.25636	1.89355	2.28758	1.76034	1.81796	2.04362	1.83761	2.21153	1.80553	1.93642	1.98162	1.90489	2.13909	2.45245	3.01678	1.81442	2.4684	2.00596	2.10209	2.18036	2.27214	1.91635	1.84483	1.74892	2.41373	2.18236	3.12687	3.53979	2.80821	2.10152	2.11811	1.79031
PTPRG-AS1	1.94165	2.45431	2.14153	2.24577	2.02781	2.03581	2.59729	2.1556	2.14392	2.50622	1.75307	2.02616	1.99137	2.1061	2.38605	2.26298	1.72317	2.45571	2.0153	2.25076	1.8043	1.81127	3.28962	2.05472	2.38618	2.70094	1.78551	2.38112	2.13226	2.10291	2.06687	2.18179	1.92502	2.18018	1.9356	1.9862	2.0496	2.22733	2.00711	2.20258	1.86776	2.26666	2.38916	2.42672	2.14817	2.25297	2.30179	3.1826	1.83705
SH3RF3-AS1	2.08115	2.18504	2.32033	1.87063	2.34867	1.99029	2.69446	1.91468	2.51813	1.71805	2.02507	1.97259	2.21898	2.16936	2.2622	2.13162	2.18862	2.03238	1.98925	2.09707	1.89263	1.74008	2.07961	2.36777	2.25746	1.83604	1.53686	1.97615	2.20231	2.02872	2.22462	2.43155	1.90029	2.25671	2.3089	2.13937	2.2532	1.99276	2.37129	2.01317	2.49968	2.49263	2.25106	2.13193	2.80233	2.56928	2.17571	2.06586	1.9331
DLEU1	2.06653	2.24283	2.47371	2.09926	2.17823	1.93714	2.85677	2.21347	2.32578	1.95727	1.86549	2.45973	2.35234	2.33284	2.63424	2.50333	2.10042	2.4992	2.07396	2.51384	2.15276	2.38354	2.46796	2.28083	2.26339	2.32414	1.82885	2.20714	2.54509	2.26965	2.16864	2.38546	2.18389	2.6846	2.28192	2.4039	2.49746	2.32842	2.84795	1.96971	2.09062	2.20503	2.54769	2.51108	2.48132	2.57871	2.81757	2.7095	2.08821
HOXC-AS2	1.86516	2.01512	3.97797	1.81249	2.05811	2.04408	2.14352	1.89112	2.38275	1.62397	1.70539	2.36013	2.44094	1.93791	1.94882	3.95004	1.79773	1.80224	1.7328	1.98139	2.17489	1.56218	2.64788	1.85179	3.55603	1.76053	1.66572	2.27324	1.97208	2.39202	2.36942	2.03496	1.70088	1.96979	1.89619	1.90196	1.895	4.13377	1.90058	2.13128	1.73521	2.0041	2.21866	2.06232	1.94968	1.84266	2.34282	2.58483	1.84812
GHET1	2.40565	2.16408	2.31892	2.31568	2.15783	2.24614	2.19056	2.14153	1.92983	1.81432	1.74673	2.14347	2.23238	2.16979	2.96911	2.20735	1.74878	2.45782	1.75998	2.03998	1.85684	1.92889	2.10888	1.98146	2.25843	2.36023	2.01757	2.33619	2.32755	2.07474	2.62285	2.19645	1.93716	2.16326	2.14756	2.25787	1.9781	2.87183	2.01412	2.13014	1.85772	2.38417	2.477	2.44161	2.10632	2.263	2.16332	3.02154	2.37724
LINC00471	2.05843	2.02966	2.54142	2.32875	2.13025	2.35716	2.6496	2.23169	2.19806	1.8186	1.79464	2.35804	2.98303	1.99836	2.06853	2.3636	2.1552	2.44048	1.75396	2.41258	2.05141	1.76238	2.07264	2.16525	2.09999	2.48752	2.12974	2.71837	2.02675	2.50564	1.99194	2.17228	1.8663	2.29708	2.06438	2.29681	2.07416	2.25192	2.12809	2.01339	2.14701	2.46785	2.32973	2.79468	2.09723	2.49903	2.46918	2.91821	2.35727
UBAC2-AS1	2.19232	2.7496	2.55559	2.39236	2.177	2.22482	2.29061	2.61918	2.22545	2.27533	1.80381	2.64469	2.91459	2.22583	2.56324	2.47464	2.16732	2.31337	1.85672	2.70933	2.04482	2.05396	2.1522	2.06776	2.54933	2.99224	1.92595	2.45337	2.25992	2.46388	2.45638	2.15073	1.96141	2.15187	2.4614	2.26094	2.06829	2.23721	2.19867	2.04411	2.15802	2.18818	2.50706	2.5395	2.62317	3.22861	2.76261	2.8238	1.92261
TOB1-AS1	2.02762	2.2362	2.4815	2.16561	2.56783	2.3057	2.09418	3.03834	2.23241	1.98604	2.11751	2.10665	2.82902	2.64995	2.19164	2.35571	2.31657	2.63466	1.82145	2.52488	2.06405	2.06441	2.34131	2.12853	2.43704	2.64332	2.04686	2.70053	1.99258	2.33633	2.82529	2.17149	2.02788	2.29224	2.37557	2.34028	2.33792	2.53889	2.27317	2.37257	2.50556	2.32221	2.26991	2.30358	2.70383	2.62212	2.45296	3.1243	2.2737
KLF7-IT1	1.90222	2.75466	2.01027	2.01941	1.87955	1.8923	2.27948	2.1416	2.40136	1.6853	1.79235	1.94227	2.31727	2.35565	2.14899	2.20935	1.67325	1.94084	1.89237	1.87763	1.83138	2.37413	2.31472	1.94146	2.58082	1.92057	1.59413	2.63282	2.35874	2.29685	1.91004	2.6762	1.82438	2.18597	2.03327	2.05749	2.05207	2.37971	2.15909	2.09302	2.0826	1.9962	2.36976	2.23976	1.95249	1.98975	2.13766	2.00892	1.9046
LINC01220	1.88829	2.45196	2.87567	2.25037	2.34844	2.31728	2.42829	2.47192	2.16309	1.79725	1.96422	2.50193	2.35954	2.30007	2.22775	2.15616	2.08823	2.15384	2.52429	3.40117	2.14619	2.02409	2.09273	1.99674	2.47199	1.93574	2.28506	1.96144	2.00894	2.31736	2.49553	2.33258	1.72053	2.27254	1.99522	2.07437	2.13822	2.70112	2.16957	1.90469	2.158	2.11547	2.16177	2.251	2.27308	1.94902	2.59368	2.12181	1.98226
FTX	2.03194	2.11546	2.05928	2.00017	2.24504	2.00588	2.22807	2.61471	2.26406	1.68438	2.04539	2.03561	2.17412	2.42009	2.24367	2.24094	1.77931	2.19204	1.86635	2.61794	1.94274	3.25128	2.32348	2.60106	2.19116	1.96524	1.6599	2.26312	2.63397	2.15558	1.97303	2.49455	2.12308	2.35071	2.15067	2.30071	2.21555	2.33238	2.23069	2.25628	2.15769	2.27413	2.46354	2.32424	2.20107	2.08256	2.13501	2.0865	2.04165
LINC00910	2.30423	2.95889	2.49717	2.03168	2.40788	2.49211	2.34387	2.33283	2.30802	2.18887	2.04904	2.22621	2.73443	2.51945	2.7445	2.36728	2.08201	2.76734	2.5066	2.50527	1.99788	1.90872	2.59035	2.4466	2.97801	2.54684	1.74092	2.66072	2.05576	2.45218	2.63341	2.32675	2.08655	2.96013	2.30967	2.43669	2.22474	3.0356	2.38611	2.3263	2.19637	2.30043	2.24267	2.45584	2.50672	2.31313	2.40966	2.19248	2.06394
LINC00571	1.90169	2.15962	2.0808	1.98829	2.33393	1.86658	2.07566	2.36314	2.0143	1.67217	1.8227	1.95295	2.18561	2.23476	2.00408	2.33527	1.66414	1.9404	1.77597	2.25575	1.82373	2.60092	2.26072	2.13878	2.09617	1.92003	1.53298	2.09512	2.33339	2.10997	1.97904	2.2559	2.0276	2.1033	1.98586	2.29434	2.61991	1.98049	2.06537	1.84756	1.91575	2.15123	2.17787	2.33633	2.36848	2.00562	2.27714	2.22947	1.88792
FAM218A	2.28758	2.22079	2.99901	1.83016	2.15314	2.21442	2.03912	2.03749	2.24146	1.63035	1.79275	2.00925	2.91169	2.5408	1.97978	2.14428	1.95954	2.116	1.76285	2.08811	1.93688	1.78267	2.1782	2.17236	2.23066	1.81391	2.47812	1.91766	1.88765	1.94677	2.05335	2.0718	1.98822	2.04393	2.22429	2.22445	1.99164	2.5324	2.21902	2.08036	2.15438	2.3294	2.36641	2.0921	3.10467	2.01105	2.11611	2.62224	2.10989
NUTM2B-AS1	2.318	2.4513	2.43402	2.63847	2.62746	1.97018	2.91037	2.35419	2.62853	2.08631	2.18409	2.27947	2.67619	2.70195	2.5723	2.61021	2.24117	2.45246	2.3454	2.3298	2.46232	1.99877	2.65862	2.69003	2.71064	2.52515	1.9279	2.67309	2.58775	2.42158	2.18364	2.84236	2.18209	2.50197	2.41523	2.39801	2.30849	2.23955	2.45337	2.37435	2.43844	2.32284	2.60521	2.66035	2.58057	2.64403	2.50641	2.68268	2.16563
ATP6V0E2-AS1	2.25678	2.10656	2.89615	2.55714	2.30186	2.55518	3.06869	2.33247	2.23401	1.91186	1.98113	2.32998	2.67744	2.19532	2.3134	2.10674	1.81572	2.47132	1.78786	2.22587	1.90127	1.91009	2.09046	1.97642	2.36971	1.91336	2.50245	2.48056	2.02243	2.00226	2.17159	2.1997	1.89884	2.09565	2.20949	2.15991	2.02141	2.57336	2.22655	2.25168	2.17019	2.8821	2.23557	2.29043	2.20889	2.17743	2.03372	3.10527	2.30077
LINC00235	2.38116	2.11959	2.46426	2.11001	2.33832	2.71881	2.05193	2.10468	2.10889	2.02472	1.90666	1.96989	2.93905	2.25626	2.27948	2.01935	1.85925	2.57082	1.70324	1.87058	1.8187	2.04681	2.06714	2.00991	2.14687	2.32455	2.01186	2.19981	2.03386	2.75424	2.19308	2.55375	1.88459	2.13005	2.15564	2.19459	2.04384	2.70543	2.15829	2.231	2.05862	2.31564	2.48913	2.67284	2.78894	2.35973	2.09254	2.42436	2.07707
SUCLG2-AS1	2.05043	2.17985	2.41552	2.03182	2.04696	2.02303	2.24746	2.05595	2.23542	1.77998	1.9233	2.11628	2.09431	2.06316	2.54383	2.2182	1.97149	2.23365	1.8152	2.10142	2.13849	2.65545	2.07621	1.98078	2.0424	2.05881	1.73784	2.47046	1.97717	2.00748	1.93002	2.85976	1.84761	2.53271	2.09127	2.08704	2.1187	2.06556	2.42695	1.95696	1.9664	2.10833	2.44245	2.37386	2.15824	2.02687	2.36402	2.18353	1.90892
LOH12CR2	2.03379	2.22053	2.87169	2.30265	2.32115	2.16858	2.32651	2.53942	1.95181	1.91671	2.03766	2.08951	2.91623	2.49289	2.2882	2.4139	2.02242	2.47297	2.06832	2.24076	1.83063	1.9315	2.22363	2.19358	2.33633	2.29531	2.11802	2.01772	2.15363	2.05142	2.39413	2.16831	2.118	2.30728	2.25473	2.17801	2.12302	2.5787	2.22572	2.08292	2.31062	2.58515	2.10639	2.49983	2.42141	2.9522	2.73782	3.91494	2.15568
LINC01395	2.14438	2.42943	2.40178	2.66502	2.16018	2.67412	2.66401	1.88355	2.20633	1.74828	1.68322	2.28992	2.03708	1.94029	3.15526	2.89011	1.65276	2.91119	1.8525	1.82155	3.1878	1.9912	2.01132	1.8289	3.67915	1.74986	1.49596	2.21075	2.11058	2.44074	2.51323	2.51465	2.22254	2.1522	1.88713	1.86612	2.05215	4.61184	1.94378	1.80017	1.84264	1.9027	2.06766	3.1502	2.7687	1.85483	1.91881	1.91419	2.07364
ST3GAL6-AS1	1.94016	2.03683	1.89224	2.23962	2.15653	2.13233	2.19488	2.6885	2.22559	1.83941	2.06754	1.95101	2.18375	2.1686	2.07518	2.0162	1.80481	2.06973	1.85229	1.86531	2.02589	1.91019	2.30569	2.22422	2.03823	1.98336	2.23991	1.99145	2.63408	1.93209	2.11945	2.08436	2.21695	2.05766	2.18806	1.89758	2.07649	2.46483	2.82738	2.27009	2.24845	2.40407	2.09833	2.10338	3.64627	1.90814	2.36977	2.59805	2.09546
SEPSECS-AS1	1.94784	2.14158	2.2584	2.45502	2.5163	2.14472	2.91277	2.47173	2.1942	2.32283	1.91861	2.04584	2.28707	2.44351	2.21197	2.47855	2.01575	2.3341	2.07605	2.24352	1.92274	1.88495	2.17469	2.08617	2.14481	2.44545	2.17401	2.18445	1.9741	2.05802	2.28767	2.86248	1.96689	2.27663	2.26361	2.15516	2.3737	2.4229	2.23381	2.18039	2.4241	2.3259	2.19531	2.31728	2.52369	2.5335	2.27951	2.63939	1.93778
FAM222A-AS1	2.14845	2.40688	2.10487	1.91477	1.96464	1.70116	2.02524	2.08879	1.93641	1.81507	1.75112	2.16698	2.39605	1.95775	1.93658	1.94864	1.90737	1.83749	1.78359	1.8562	1.81326	1.85785	1.99252	2.18729	2.184	1.74986	1.68998	2.5585	1.8883	2.31165	1.90145	2.31632	2.17651	2.03959	1.94264	2.00938	2.06294	1.89412	2.29507	1.77575	1.85433	1.99389	2.69484	2.54905	2.35243	2.69454	2.20333	2.23582	2.06017
FOXCUT	1.86812	1.94382	1.9069	2.13246	2.07632	2.25337	2.1969	1.98122	2.14054	1.60601	1.75569	2.03576	2.15292	1.98053	1.93658	1.97561	1.65276	1.85836	1.70324	1.82155	1.86181	1.84217	2.23023	1.90368	2.12371	2.23047	1.62337	1.91766	3.4706	1.91786	2.10482	2.02764	2.20514	1.96979	2.00333	1.86612	1.895	1.91455	1.88805	2.48733	1.72432	2.1551	3.00559	2.11661	1.97622	2.07258	2.28917	3.53204	2.12768
TM4SF19-AS1	2.3033	2.16811	1.95575	1.92287	2.04498	2.16677	2.05338	1.98982	1.96915	1.74302	1.87802	2.04678	2.66819	2.04985	2.05296	2.02547	1.99983	2.68763	1.80299	2.07794	1.85359	1.80484	2.05843	2.00867	2.03692	2.03166	1.59623	2.40709	2.37684	2.98737	2.07232	2.07259	1.76482	2.08431	2.43081	2.00938	2.10754	2.27402	2.06022	2.0941	2.25832	2.02392	2.44669	2.80703	2.09499	2.05824	2.30513	2.16188	1.89769
LINC01239	1.82263	1.98118	3.45569	1.79323	2.64065	1.6814	2.02524	1.97862	1.97429	1.6112	1.87262	1.84423	2.01044	2.65919	1.99889	1.98741	1.65276	3.9993	2.53997	1.8927	1.77344	1.67282	2.08422	2.01537	3.36889	2.14381	1.62792	2.03687	1.89728	1.92075	1.8136	3.50787	1.71439	1.98948	2.05716	2.01478	1.9264	1.90254	2.0228	2.06386	1.99834	1.93441	2.29308	2.16685	1.93394	1.89898	2.79833	2.70971	1.95454
CFLAR-AS1	2.2296	2.25825	1.91215	2.08302	2.01843	2.03605	2.10028	1.95917	2.65348	1.65744	1.91971	1.92989	2.1	2.05246	2.25166	2.07048	1.74342	2.04454	1.77764	2.15223	1.82714	2.89452	2.11592	2.61425	2.29283	1.92502	1.72279	2.43754	2.08819	2.11191	1.95589	2.37581	1.91148	2.01318	2.10265	2.23043	2.11551	2.39294	2.029	1.93654	2.1516	2.058	2.68978	2.16858	2.04091	1.91088	1.95529	1.97929	1.85394
A2M-AS1	2.03969	2.2004	2.23098	2.02589	2.39474	2.25722	2.1825	2.35144	2.3275	1.80479	2.14334	2.01937	2.56069	2.06398	2.12839	2.40521	1.82135	2.66107	1.7624	2.1144	2.28347	2.12609	2.30567	2.13269	2.05322	2.14525	1.76306	2.0955	2.2324	2.49471	2.35123	2.41542	2.01678	2.27251	2.32733	2.071	2.21599	2.33988	2.38851	2.26424	2.3218	2.34962	2.18265	2.23029	2.503	2.53909	2.47696	2.5347	1.87482
LANCL1-AS1	1.81617	2.02872	1.86456	1.84555	2.10039	1.86096	2.21278	2.09881	2.45358	1.62194	2.39519	1.88849	2.17774	1.95627	1.99269	1.98963	1.68483	1.99461	1.70324	2.86358	1.86166	1.80549	2.03861	2.31828	2.00172	1.94907	1.69452	1.99227	2.05187	2.18476	1.90814	2.1311	1.73967	2.45755	2.20091	2.14327	2.54112	2.26625	2.17543	1.99269	2.98108	2.31895	2.11003	2.10395	1.98569	1.99296	2.41083	2.02522	1.78297
RASAL2-AS1	2.12204	2.61801	2.28437	1.89512	1.96628	2.14094	2.12478	1.96004	2.17625	1.80667	1.99389	2.09003	2.92199	2.15556	2.49147	2.15394	2.05129	2.39701	1.92017	1.95798	1.90464	1.84512	2.15665	2.00245	2.0541	2.15181	1.77731	2.50935	2.60945	2.16723	2.08882	2.32013	1.8763	2.14749	2.32614	2.02744	2.07885	2.00979	1.96865	2.11145	2.23057	2.18281	2.87874	2.48202	2.12966	2.21158	2.19963	2.28431	1.97321
KCNJ2-AS1	2.58176	2.04004	1.93195	1.80937	2.23453	2.15235	2.06205	1.89042	2.18997	1.93236	1.93379	1.90074	2.58896	2.04198	2.16331	2.17138	1.72825	2.01247	1.71225	1.8519	1.82088	2.37266	2.15023	2.89616	2.1861	2.34644	1.97138	2.03073	2.0634	1.97637	1.91781	2.2263	1.86485	2.11355	2.15722	1.98209	2.04293	2.61035	2.27636	2.18552	2.003	2.19027	2.09401	2.10516	2.57063	2.24726	2.18281	2.97923	2.20926
HM13-AS1	1.91349	2.15884	2.18697	2.06111	1.92663	2.06125	2.14432	2.10629	2.1774	2.12722	1.91638	1.9494	2.03733	2.29298	1.99126	2.17949	1.90568	2.20733	1.98881	2.43599	2.24169	1.8022	2.17907	2.02414	2.06665	2.16834	1.58393	2.1576	1.8515	2.183	1.79895	2.15482	1.7104	2.09441	2.00573	2.24907	2.00206	2.34133	2.36882	2.0852	2.38748	2.24663	2.15874	2.29817	2.33597	2.34968	2.60897	2.26211	2.01203
LINC01117	1.79985	2.74198	2.84474	1.77844	1.97664	1.85316	2.06802	1.88355	2.08241	1.66219	1.68322	1.83876	2.51634	2.14017	1.95594	2.43254	1.94893	1.85576	1.73446	2.0214	1.7618	1.62152	1.96223	1.86501	1.9681	2.2355	1.55806	3.13746	2.33156	1.83845	2.00059	2.05071	1.76001	2.10858	1.91567	1.90397	1.895	2.01138	1.88805	1.96581	1.72432	2.20412	2.14094	2.96893	2.14603	1.83289	2.34207	2.85691	1.89416
SUCLA2-AS1	1.93142	2.00135	2.0019	2.22154	2.00143	1.92846	2.02524	2.23367	2.14204	2.53586	1.9672	1.96079	2.39485	2.16213	2.2464	2.32862	1.81474	2.75332	1.85485	1.95126	2.16082	1.99509	2.15591	2.08297	2.35237	1.87344	2.13474	2.22851	3.17333	2.22498	2.213	2.29559	1.95815	2.51927	2.32458	2.21016	1.99024	2.34296	2.20448	2.23924	2.10736	2.13005	2.37518	2.16651	2.34038	2.62862	2.35838	2.85989	1.95896
MIR99AHG	1.97913	2.057	1.90047	2.13874	2.32897	2.01133	2.13153	1.98962	2.33065	1.73804	1.85276	1.97284	2.09282	2.05653	2.00429	2.17381	1.77741	2.04985	1.74278	2.62906	1.84618	2.3126	2.0764	2.11068	1.98816	1.90125	1.9693	2.19629	2.00248	1.87262	2.00958	2.16018	1.99007	2.12117	2.25374	2.25642	2.20487	2.38952	2.66492	1.91831	2.29774	2.22662	2.09142	2.0722	2.05918	2.10527	2.01308	2.47648	2.02445
LINC00964	1.76224	1.96615	2.30872	1.80099	1.92076	2.44089	2.03125	2.31851	2.07581	1.61394	1.81011	1.85265	2.02033	2.36156	1.94735	1.92243	1.65544	1.92196	2.2385	2.73721	1.76087	1.6442	2.08352	2.00536	2.40887	1.88901	2.3964	1.96133	1.92093	2.15243	2.23599	2.11222	1.69863	2.03885	2.1091	2.1103	2.01401	2.56991	1.97925	1.79903	1.95484	2.18421	2.03677	2.15695	2.62298	1.85428	1.9798	2.26802	1.86501
DDX11-AS1	1.99013	2.22775	2.10942	2.17659	2.15144	1.93724	2.20209	2.18274	1.97361	2.37677	1.77606	2.01781	2.48613	2.34938	2.15197	2.38877	1.71929	2.46066	1.82607	1.9061	1.93751	1.95387	2.14071	1.97028	2.49265	2.19708	2.58394	2.42351	2.15628	2.14137	2.06574	2.26516	1.87468	2.09716	2.04939	2.09607	1.97686	2.24965	1.99229	2.22369	1.85861	2.09489	2.5219	2.70737	2.27252	2.57811	2.71714	3.51464	2.09813
GLIDR	2.03937	2.70763	2.54957	1.87065	2.08041	2.02127	2.15863	2.4037	2.45214	1.64642	2.09372	1.96769	2.28985	2.2725	2.14553	2.28589	2.07282	2.25111	1.79348	2.24244	2.04674	1.76841	2.43865	2.25103	2.27611	2.58927	1.87543	2.22529	2.01047	2.30651	1.98903	2.5633	1.91011	2.33469	2.22353	2.14579	2.22035	2.26269	2.40449	2.35242	2.2354	2.23115	2.36001	2.18066	2.43451	2.40334	2.31537	3.01376	2.02503
FALEC	1.99706	1.97216	2.14392	2.13515	2.24309	2.28591	2.07789	1.99781	2.24013	1.6294	1.68322	1.98058	2.18237	2.05959	2.38773	2.18149	1.85313	2.50725	1.77916	2.17232	1.88405	1.95092	2.01886	1.99909	2.42939	2.21239	1.77964	2.02624	1.8515	2.0606	1.86427	2.21583	1.86745	2.13935	2.05497	2.16456	1.895	2.72509	2.15709	1.87024	2.13165	2.45041	2.28594	2.16379	1.95637	2.11107	1.97095	2.26456	2.22674
DHRSX-IT1	1.80454	2.17337	3.06597	1.8912	2.20051	1.80639	2.15873	2.32535	2.09917	1.8678	1.86179	1.94288	2.19913	2.18216	2.13203	2.54043	1.77226	2.06878	1.76947	1.9846	2.1568	1.89131	2.03565	1.97797	2.82372	1.82101	1.52963	2.26457	1.9114	2.03346	2.1572	2.75675	1.82522	2.17028	2.0059	2.12893	2.22888	2.25754	2.12468	2.12216	1.76105	2.0458	2.12325	2.4074	2.00159	2.13287	2.86673	2.18305	1.84188
GNG12-AS1	1.91146	2.05187	1.87034	1.78942	2.35797	2.2922	2.29598	1.9266	2.02803	1.73138	1.85157	1.94057	2.0925	2.04594	2.00193	2.03306	1.70637	2.23599	1.76554	2.05095	1.74896	1.96347	2.15202	2.11561	2.22554	1.89323	1.65919	2.18584	2.01431	2.04294	2.04886	2.14904	1.90263	2.09296	2.03616	2.51053	2.0368	2.73865	2.17217	2.01205	2.07609	2.25823	2.26717	2.15581	2.05062	1.88216	2.02717	1.97756	2.16713
CASC2	1.90309	2.22331	1.9498	2.00022	2.05917	1.93519	2.23074	2.34107	2.00128	1.82301	1.96066	2.10307	2.60768	2.11712	1.99644	1.95155	1.89757	2.19987	1.87706	2.2089	1.90484	1.76437	2.3462	2.10619	2.05134	1.91091	1.5901	2.14662	1.96223	1.96051	1.91132	2.19712	1.85167	2.05598	2.02311	2.24266	2.22308	2.20649	2.39615	1.89269	1.92249	2.26924	2.1431	2.2627	2.10807	2.28438	2.14752	2.07437	1.99292
PLS3-AS1	2.00021	2.03458	1.84735	2.2053	2.21957	1.82737	2.11043	2.20236	2.18865	1.90684	1.87295	2.0641	2.32517	2.06265	2.51784	1.98434	1.80707	1.99938	1.81569	2.15814	1.78379	2.06771	2.04638	2.04578	1.96843	3.55315	1.68597	2.15795	2.09784	1.90251	1.88732	2.2386	2.55567	2.07048	2.06933	2.04796	2.06759	2.02096	2.07683	1.98665	1.9803	2.04345	2.20791	2.3465	2.37491	2.11685	2.20308	2.0185	1.92184
DLG3-AS1	1.95787	2.00951	2.30515	2.09695	2.18472	1.88653	2.20276	2.35567	2.60755	1.97106	1.82958	1.95095	2.03823	2.08272	2.30835	2.41775	2.10626	2.02187	1.91565	2.22559	1.72905	1.64751	2.09187	2.0723	2.67584	2.58597	2.12097	2.26857	2.14901	2.53937	2.08292	2.24626	1.94663	2.07174	2.1879	2.12043	1.9503	2.479	2.28966	1.97284	1.99808	2.78579	2.45072	2.30145	2.05827	2.22484	2.02471	2.21351	2.27676
PRKAR2A-AS1	2.47888	2.3917	2.75124	2.08856	2.24677	2.62346	2.29961	2.95509	2.16164	2.178	1.98436	2.26186	2.66303	2.32509	2.34052	2.29006	1.94256	2.89523	2.0606	2.15327	2.16015	1.95865	2.05123	2.11234	2.55333	2.72531	2.20251	2.32642	2.0147	2.36231	2.26515	2.34651	2.15853	2.61633	2.24917	2.46743	2.15461	2.79859	2.4283	2.39484	2.117	2.44385	2.20613	2.81072	2.48603	2.13211	2.26674	2.44287	2.24255
LINC00968	1.78312	2.20881	1.91074	1.8884	2.24835	1.74722	2.02524	1.94161	2.0901	1.62932	2.22229	1.92055	2.02327	1.94107	2.00681	1.92885	1.69959	2.15735	1.7789	2.53521	1.84643	1.98036	2.08888	2.35787	1.99785	1.93035	1.55712	1.95098	2.05999	2.05164	2.0207	2.18474	1.95105	2.25736	2.16387	2.24572	2.31534	1.96101	2.41675	1.83246	2.55155	2.67194	2.13285	2.0678	2.06584	1.87804	2.04067	2.10433	1.77662
LINC00629	1.99189	2.17393	1.86218	2.59143	2.24188	2.79687	2.12208	1.93803	1.91472	2.24737	1.7102	2.46795	2.07497	2.26456	1.93658	1.92992	1.873	2.13748	1.8854	2.15162	1.8511	2.21031	2.03242	1.9372	2.07605	2.01185	2.1041	2.1446	1.97725	2.11024	1.87985	2.11439	2.12872	2.03816	1.9939	1.92393	1.92458	2.06924	1.94816	2.08776	2.05606	2.22695	2.20652	2.65275	2.98509	1.99106	1.98849	2.14213	2.77248
MIR100HG	2.01986	2.34505	1.882	1.85928	1.92416	1.76142	2.06865	2.10228	2.10119	1.60601	1.80932	1.85903	2.03402	1.95904	2.01363	1.95017	2.33779	1.88296	1.73493	1.90947	2.09353	2.24332	2.06158	1.98138	1.93675	1.81721	1.52781	2.00749	2.04928	1.91532	1.88769	2.61422	1.99726	2.31355	2.20137	1.99037	2.31435	1.89527	2.23454	1.78725	1.94155	2.10352	2.53198	2.97908	1.9669	1.89459	2.03551	1.97497	1.75099
ZNF197-AS1	1.77166	2.06829	2.21148	2.05626	1.87955	1.95972	2.71036	2.01263	2.00568	1.76797	1.79773	1.96817	2.42895	2.01633	2.12111	2.05419	1.8549	2.17725	1.87024	2.40662	2.05973	2.08521	2.28946	2.12462	2.00618	2.14707	1.87016	1.968	1.91403	2.1511	1.79895	2.15252	1.94803	2.16088	2.0404	2.20918	2.17195	2.42237	2.24349	1.82576	2.00593	1.94988	2.18351	2.21784	2.23614	2.11665	1.99681	2.59812	1.75329
SPATA41	1.95108	2.0768	1.89262	1.88392	2.42278	1.99089	2.02524	2.23813	2.00442	1.72823	2.04709	1.97944	2.24918	2.20739	2.00025	2.39169	2.15949	2.127	1.71374	2.16969	1.84587	1.6573	2.00834	2.28564	2.0874	2.04618	1.71207	2.07633	1.90747	1.97469	1.83464	2.16812	1.78527	2.15771	2.26594	2.17613	2.07768	2.26132	2.09854	1.81831	2.16888	2.26367	2.31369	2.47447	2.05561	1.95227	2.49261	2.15363	2.03702
LINC00900	2.12565	2.05183	2.71106	1.96243	2.18783	1.93056	2.15895	1.9592	2.04096	2.13856	1.87273	1.98985	2.58177	1.94523	2.06244	2.82614	1.79319	1.90263	1.86508	2.31021	1.92414	2.03695	2.12732	1.93734	1.97347	1.96681	1.61643	2.05793	2.06106	2.08435	2.118	2.1827	1.94203	1.99363	2.20799	2.03574	1.98881	2.90617	2.01677	2.08909	1.88749	2.64118	2.17317	2.17956	2.60305	1.94249	2.03838	2.03667	1.8753
LINC00476	2.10305	2.16973	2.20762	1.99038	2.37553	2.23228	2.19356	2.64694	2.45832	2.18113	2.25307	1.99781	2.33294	2.32639	2.11716	2.23251	1.92272	2.05523	1.81555	2.42977	2.05661	2.18949	2.19004	2.09787	2.13152	2.62618	2.09859	2.44615	1.94957	2.31143	2.02499	2.3719	2.31588	2.16337	2.42229	2.33728	2.23096	2.434	2.56876	2.20918	2.41039	2.37376	2.30713	2.35973	2.63221	2.27329	2.27563	2.89057	2.0693
LINC01515	2.01389	2.28667	2.1223	1.87223	2.04655	1.79525	2.02524	1.94744	2.10184	1.62318	1.74118	1.89772	1.99422	2.03491	2.29507	2.01009	1.85813	2.19942	1.91147	2.2589	2.3505	1.77929	2.05365	2.15945	2.14201	1.94415	1.61256	2.42417	2.0919	1.88111	1.99901	2.52956	1.69592	2.29919	2.06256	1.92879	2.41608	2.02762	1.89082	1.83809	1.78105	1.94427	2.18226	2.73687	2.51424	2.09679	2.34003	2.1357	1.87094
ITFG1-AS1	1.84216	1.96947	1.94773	2.08001	2.18195	2.01347	2.2072	2.10719	2.29659	1.76723	1.79721	2.00808	2.11848	2.21906	2.23092	1.98013	1.92723	2.31021	1.86949	1.99074	1.90305	1.82541	2.08721	2.01984	2.43966	1.78729	1.53096	2.27684	1.91374	2.07799	1.91498	2.2217	1.83065	2.06804	2.17767	2.3057	2.09719	2.49873	1.88805	1.98854	2.2925	2.12518	2.31205	2.08696	2.39579	1.99662	2.05889	2.06022	1.95465
LINC00092	1.92359	2.06502	2.46619	2.40609	2.33667	2.00965	2.06419	1.94077	2.08939	2.16125	2.25227	1.91012	2.23735	2.18306	2.01702	1.93481	1.84459	1.85099	1.82254	1.94598	1.8167	1.71198	2.19116	1.97628	2.02073	2.29257	1.73475	1.98525	1.90239	1.99472	1.8631	2.16855	1.9322	2.02927	2.25529	2.04108	2.23931	2.04878	2.69243	2.07162	2.5787	2.19507	2.1672	2.08063	1.95585	1.91522	2.04706	2.33357	1.8859
LINC01545	1.86032	2.245	2.16155	1.84847	2.15863	1.90311	2.02524	2.40806	2.20858	2.0179	1.77339	1.96518	2.63296	1.9192	2.08261	2.03659	1.8868	2.49892	2.06773	2.34686	1.85404	1.66875	2.13571	1.96628	2.13127	1.87788	1.69066	1.97643	1.8515	2.15801	2.27838	2.37848	1.73374	2.27102	2.06506	1.91565	2.13014	2.28193	2.12899	1.83758	2.04904	2.05399	2.04593	2.17062	2.10246	2.25446	2.34389	2.13714	1.81271
CYP4F26P	1.83361	1.98594	2.1427	1.79513	3.07105	2.19488	3.05109	1.88355	2.0502	1.60601	1.70483	1.83876	2.62549	1.93744	1.93658	2.62664	1.78881	1.85167	2.19223	1.85412	1.91954	1.58012	2.03237	1.89481	2.53443	1.81118	1.49596	2.26518	1.8515	1.83845	1.79895	2.0699	1.69431	1.96979	2.00613	1.88951	1.9187	1.87593	1.98301	2.04329	1.74546	1.88259	2.91558	2.23274	1.95625	2.43325	2.64501	2.148	2.05288
ZNF350-AS1	1.90687	2.0061	2.07703	1.97122	2.01127	1.89447	3.66118	1.96391	3.65499	1.73151	1.92856	2.05627	4.06248	2.09278	2.92462	2.26762	1.71767	1.99474	2.44821	1.9617	1.72905	1.85795	2.17114	2.14347	4.14016	2.86346	1.89336	2.06646	1.92767	2.03768	2.42259	2.15003	2.70302	1.96979	2.03736	2.10801	2.02265	2.20056	2.09216	1.9426	2.20534	2.32486	2.29847	2.15592	2.16589	1.99412	2.03745	2.1991	1.83046
FAM83C-AS1	1.97747	2.03304	2.25267	1.77844	2.06636	2.00456	2.18813	2.0631	2.0346	2.08551	1.81741	1.95386	2.70193	2.08689	2.01199	2.32786	1.86653	2.30081	1.70324	2.10995	1.79337	1.62495	2.21697	1.89975	2.22144	2.30321	2.53032	2.31186	1.8515	2.24031	2.08986	2.35653	1.72128	2.0055	1.88713	2.01092	2.04168	2.34899	1.88805	2.09753	1.91722	2.09876	2.47081	2.33336	2.18434	2.38889	1.89715	2.08577	2.10875
LINC00242	1.88102	2.25045	2.48142	1.89952	2.24518	1.97463	2.35982	1.90427	2.07849	1.83049	1.94463	2.16516	2.5724	2.08221	2.49882	2.27257	1.78105	1.973	1.87506	2.10222	1.76685	1.98361	2.41658	1.94073	2.33464	1.96812	1.58489	2.13758	2.05109	2.52362	2.09487	2.22228	1.76637	1.99587	2.1734	2.26128	1.98221	1.95653	1.95567	2.16821	1.83048	2.0458	2.29602	2.23061	2.00713	1.99411	2.11092	2.29641	2.2622
ZNF571-AS1	1.98684	2.01655	1.91352	1.90269	1.93986	2.27628	3.33345	1.93073	2.04967	1.94836	1.76755	1.91385	2.00482	1.96867	2.77253	2.13401	1.94433	2.15951	1.99958	1.87793	1.97151	1.75358	2.11836	2.04697	2.05785	2.91658	2.40664	2.05125	1.91971	1.90827	1.88741	2.104	1.8279	2.51819	1.98533	2.09906	1.93031	2.26041	1.99418	3.02678	1.94545	2.05933	3.73198	2.16747	2.06209	1.89349	1.93883	2.16527	1.88759
LINC00702	1.86577	2.08905	1.88152	1.8173	2.14643	1.92041	2.0297	1.89589	2.23203	1.63329	2.03152	1.87962	2.01987	1.94963	2.00712	1.96731	1.68038	2.00621	1.80067	1.91247	1.83114	1.72306	2.03733	2.0932	1.95621	1.80815	1.49922	1.97754	2.18528	1.905	1.98683	2.1316	1.81216	2.12105	2.1096	2.09238	1.99554	1.91091	2.11932	1.90696	2.26309	2.12434	2.30237	2.09373	1.97298	1.87078	2.13533	1.99684	1.76896
SLC2A1-AS1	2.094	2.42288	2.00591	1.93426	2.08052	2.16069	2.33283	2.48437	2.07227	1.94404	1.99911	1.93963	2.39625	2.19499	2.32178	1.99582	1.97226	2.32812	1.8644	2.45913	1.95182	1.7347	2.13166	1.87379	2.30146	2.1428	2.64961	2.63524	2.13043	1.93986	2.06511	2.12118	1.73516	2.05072	2.08808	1.99561	2.05538	2.32862	1.92893	2.06882	1.93804	2.07717	2.22127	2.3238	2.08525	3.10126	2.46399	2.27496	1.97113
EZR-AS1	1.7348	2.08588	1.83568	1.94443	2.17144	1.94879	2.02524	2.16448	2.1469	1.93463	1.68322	2.07708	1.97382	2.26014	1.99804	1.90283	1.77226	2.1856	1.70324	1.9846	1.72905	2.11707	2.23586	2.0471	1.93675	2.21365	2.07699	2.0577	1.8515	2.06949	1.79895	2.10066	1.68206	1.96979	1.97711	1.98466	2.01508	2.02196	2.12468	1.85567	1.83181	2.22611	2.25282	2.14974	2.07203	2.02025	1.89715	2.30076	1.92626
FAM66D	1.7846	2.23088	2.12291	1.81944	2.23874	1.85563	2.05793	2.08826	2.13147	1.75769	1.86058	1.86907	2.15251	2.07012	2.03691	1.90283	1.68191	2.21472	1.70324	1.93904	1.72905	1.7142	2.13012	2.35883	2.07475	1.82543	1.63409	2.01835	1.89423	1.89649	1.87908	2.16276	1.81314	2.17616	1.95151	2.08265	2.03589	2.16916	2.21321	2.04494	1.8745	2.16233	2.30983	2.05251	2.15935	1.96822	1.96553	1.9487	2.09486
SNAI3-AS1	2.2657	2.21827	2.52777	2.06297	2.38404	2.69405	2.27877	2.31611	2.20969	1.93406	2.14584	2.17351	2.34911	2.09083	2.24476	2.46395	1.97599	2.33153	1.75908	2.19892	2.07843	1.76676	2.29413	2.23335	2.67464	2.12899	1.62235	2.40723	2.00861	2.1394	1.96206	2.38331	1.87429	2.32031	2.29549	2.38006	2.32957	3.05041	2.20503	1.98345	2.39623	2.43466	2.31355	2.4447	2.12317	2.28749	2.18888	2.23278	2.18356
HCG14	1.94409	2.05693	2.10354	1.95238	2.09006	2.083	2.02524	2.03794	1.92263	1.75918	1.85265	1.90528	2.59005	2.19433	2.15081	2.01844	1.77808	2.3361	1.70324	2.28329	1.78405	1.72584	2.11244	2.15932	2.08933	3.03342	2.10111	2.13263	1.94482	1.90282	2.39137	2.06647	1.71556	2.03015	2.02653	1.92961	2.24395	2.38374	2.3954	1.86062	1.99122	2.338	2.14287	2.05251	2.92489	2.1181	2.13572	2.48403	1.86995
LINC01010	2.00496	1.99314	1.84506	1.79314	2.1055	1.77689	2.04855	1.90937	1.91912	1.60601	1.8027	1.87105	2.00423	1.94323	1.97304	2.09195	1.69911	1.8951	2.03042	2.32966	1.79047	1.691	2.1237	2.02303	1.96226	2.11352	1.53827	1.92996	2.06595	1.90026	2.00338	2.0464	1.76625	1.97961	1.97782	1.9951	2.23961	2.19894	1.90949	1.94387	2.04272	2.28616	2.05416	2.22738	1.94024	1.92249	3.17578	2.03328	1.92776
ZNF341-AS1	1.83078	2.30837	2.11753	2.70698	2.258	1.90496	2.02524	2.02045	2.03486	2.28893	1.84931	2.02603	2.43394	2.06045	2.20145	2.03774	1.8162	2.0956	1.98718	2.02034	1.85512	1.95471	2.00799	1.93405	2.08631	2.32668	1.80694	2.0478	2.28798	1.91379	2.04559	2.13885	1.92012	2.04046	2.14855	2.17401	1.9703	2.36834	2.00245	1.93649	1.91748	2.24175	2.39023	2.25496	2.40285	2.211	2.22316	2.70262	2.12585
USP12-AS2	1.89256	2.00074	1.92029	1.77844	1.87955	2.38938	2.02524	2.25384	1.83348	1.74284	1.76931	1.88829	2.02963	1.9192	2.16218	1.90283	1.74655	1.93277	1.78022	1.94992	2.2752	1.78646	2.07488	1.91772	2.15725	1.91073	1.49596	2.13001	1.8515	1.83845	1.92851	2.08475	2.35213	1.96979	2.02478	2.20687	1.98925	2.10484	1.88805	1.83382	1.80861	2.0458	2.26106	2.05251	1.98545	2.1147	2.86673	2.02477	2.51298
HAS2-AS1	1.97298	2.17653	1.96507	1.87105	2.0162	1.84878	2.34253	1.88355	2.13746	1.63544	1.76362	1.90754	2.14843	1.96494	2.08086	2.26771	2.51598	1.85434	1.75156	1.97944	1.8876	1.95712	2.14171	1.96462	1.94903	1.81448	1.49596	1.95277	2.82826	1.88316	1.88081	2.36502	1.95787	2.0048	2.21667	2.09987	2.27809	1.94036	1.94889	2.15983	1.87768	2.1112	2.28103	2.1466	1.98159	2.29441	2.15836	2.06654	1.77916
UMODL1-AS1	2.01972	2.01035	2.5679	2.51603	1.94369	2.01645	2.02524	2.19352	1.85111	1.74837	1.73989	1.94628	2.87575	1.94814	2.11589	2.02519	1.65906	2.00146	1.70324	1.8731	1.72905	2.04573	2.23923	2.10017	2.20081	1.8149	1.96122	1.94717	1.92403	2.01735	1.91758	2.1582	1.88879	1.96979	1.88713	2.03156	2.23291	3.04073	2.44358	1.98907	1.85404	2.97988	2.22544	2.05251	2.1876	1.85303	2.00325	2.08357	1.85866
LINC00355	1.7348	1.94382	3.35498	1.92337	1.87955	1.72597	2.2072	1.88355	1.89291	1.6131	1.70934	1.83876	2.09535	1.9192	1.93658	2.04153	1.65276	2.55268	2.18761	2.24984	1.81287	2.45434	1.96223	1.8954	2.7393	1.98282	1.50772	2.15239	2.59649	1.85285	2.15416	2.02764	1.68949	1.96979	1.88713	1.86612	1.895	1.85962	1.88805	1.76669	1.72432	1.87651	2.31205	2.05251	1.92753	2.83971	2.12858	3.16802	1.73707
P3H2-AS1	1.85691	1.96584	1.83568	1.77844	1.91126	2.06285	2.54355	1.88355	2.11609	1.60601	2.01493	1.85789	2.05828	1.9475	1.93658	1.93649	1.68933	1.9272	2.53109	2.59668	1.82119	1.56946	2.00633	2.11391	1.93675	1.90394	1.49596	1.91766	1.8515	1.91107	1.99258	2.0715	1.86208	3.38555	1.99351	1.86612	2.07006	1.98198	2.37078	1.81555	1.99568	2.13203	2.0105	2.0821	1.99375	1.83289	2.01003	1.95746	1.72895
FRMD6-AS1	2.01807	2.31921	2.20848	1.83717	2.00996	2.1146	2.03879	1.99953	1.97922	1.64733	1.77984	1.94218	2.63604	2.04463	2.40709	2.1577	1.80786	2.03832	1.73263	1.88725	1.8676	1.98788	2.04072	2.02181	2.14037	1.87232	1.87832	2.0011	2.34573	2.2858	1.83249	2.08483	1.8254	1.98682	2.12799	1.95926	1.93111	2.18073	2.17127	2.28558	1.82907	2.08066	2.50571	2.31174	1.99967	1.86182	1.9992	2.48816	1.98595
LINC00880	2.35321	2.44127	1.96247	1.87005	2.02293	1.89624	2.06967	1.9567	2.18282	1.83771	1.74328	2.2004	2.13727	2.1657	2.05327	1.9749	1.70538	1.821	2.98546	2.04468	1.78531	1.90563	2.04868	1.8787	2.01163	1.86295	1.59163	3.54699	1.94692	2.01571	2.07138	2.13621	1.7564	1.96979	1.94582	2.18646	1.99889	1.94046	1.94232	1.92431	1.79458	2.02474	2.55538	2.88416	1.94378	1.87529	2.06724	3.58858	2.7539
RERG-IT1	2.01482	1.94382	1.83568	1.9	1.87955	2.34789	2.1227	1.99123	2.06606	1.60601	1.83895	1.83876	2.02562	2.74192	1.93658	1.90283	1.69698	2.28249	1.84285	1.82155	1.80399	1.59899	1.96223	2.54911	1.93675	1.74986	1.56782	2.01997	2.0944	1.83845	1.79895	2.02764	1.97557	1.96979	2.01515	1.95254	2.1432	1.97847	2.28995	1.89815	2.01482	2.18259	2.07255	2.12326	1.92753	2.15475	1.89715	1.91419	1.91909
LINC01058	2.05888	2.11414	1.94033	1.93953	2.07468	1.94114	2.09144	2.02646	2.26922	1.85195	2.02583	1.90019	2.17215	2.05256	1.99616	1.90283	1.74055	2.07295	1.84389	1.82155	1.92224	2.02372	1.96223	2.18145	2.12214	1.74986	1.54464	1.98719	2.42952	1.95498	2.03227	2.26157	1.88568	2.18088	2.05666	2.03532	2.06637	2.12496	2.8829	1.85261	2.01688	1.98096	2.20918	2.47228	2.31287	1.83289	2.27387	2.05068	1.89027
PARD6G-AS1	1.84219	2.03279	1.97688	1.87496	1.95408	1.84743	2.1025	1.95856	1.94494	1.73662	1.89827	1.92785	2.45475	2.1303	2.1151	2.05193	1.67903	2.18006	1.81424	1.98352	1.85922	2.11367	2.06199	2.0019	3.29076	2.03949	1.93437	2.65337	1.99193	2.58835	1.87909	2.20411	1.81873	2.07152	2.01719	1.94013	2.18866	2.40461	2.16892	2.00812	1.95769	1.98193	2.70889	2.11761	2.24263	2.27372	2.07279	2.16381	1.79092
CELF2-AS1	2.1845	1.95689	1.87455	1.95305	1.97138	1.78119	2.07361	1.90385	2.73194	1.64338	1.92289	1.88914	2.00563	2.10904	2.23479	2.01889	1.65822	1.82522	1.7559	1.90986	1.86332	2.06004	2.03959	2.09313	2.20621	1.76897	1.51382	1.99323	1.91463	1.91357	1.82928	2.30263	1.82759	2.27959	2.09226	2.12405	2.09035	2.08957	2.10783	1.86955	2.11704	2.03603	2.35307	2.06132	2.11522	1.88472	1.98146	2.07392	1.74742
TMEM220-AS1	1.97853	2.11099	1.88122	1.82314	2.20683	1.85277	2.0396	1.96145	2.11197	1.74513	2.06391	1.89773	2.21014	2.13114	2.04277	1.92629	1.79357	1.96497	1.78485	2.15428	1.89533	1.73221	2.30649	2.05364	1.95768	1.88968	1.59779	2.0202	2.06257	1.98586	2.03111	2.16755	1.84556	2.02911	2.25712	2.05698	2.15459	2.36977	2.58905	1.95598	2.16724	2.19001	2.09855	2.24654	1.99646	2.06161	2.48375	2.04534	1.84762
LINC00240	1.86181	1.98812	2.07693	1.8305	2.20468	2.04724	2.34335	2.18471	1.94617	1.78404	1.75765	2.33646	2.32437	2.26909	2.23896	2.20297	1.83843	2.08928	1.79872	2.50407	1.83907	1.72424	2.1599	2.1239	2.19293	2.21011	1.71758	2.06721	1.92923	1.91204	2.18118	2.22646	1.88893	2.29073	2.04315	2.13344	2.13756	2.74201	2.01174	1.83637	1.95517	2.33208	2.17456	2.19051	2.22119	2.03274	2.07428	2.03741	2.12835
BACH1-IT1	2.12892	2.02066	2.00324	2.14589	2.04117	1.80533	2.71676	1.96328	2.26937	1.78899	2.02991	2.06053	2.22192	2.19585	2.27526	2.22685	1.77881	2.2222	1.97213	1.82155	1.81127	2.25708	2.16612	2.23345	2.45301	1.98912	1.81028	2.13385	2.4405	2.13656	2.12714	2.28116	1.74869	2.03051	2.15512	2.10621	2.1381	2.2886	2.07877	1.98428	2.01698	2.06794	2.46532	2.22755	1.98656	2.24419	2.15899	2.09734	1.85379
KIF9-AS1	2.04159	2.32011	2.02606	2.05427	2.16081	2.25688	2.32617	2.21098	2.17077	1.83252	1.87238	2.01166	2.2846	2.12526	2.354	2.31112	2.26801	2.42966	2.04279	2.15468	2.09089	2.23695	2.17587	2.04646	2.30592	2.13842	2.17075	2.27381	2.19042	2.08762	1.98011	2.27692	2.2776	2.08943	2.0973	2.1213	2.13938	2.41507	2.11429	2.04736	2.01446	2.11839	2.26033	2.84244	2.08373	2.05051	2.12344	2.12685	1.97785
APOA1-AS	1.89123	2.08095	1.87823	1.96874	2.14459	1.95557	2.27236	2.0789	2.38697	1.65267	1.80942	1.88786	2.00175	1.99148	1.98419	1.98853	1.65276	1.99226	1.7419	1.94883	1.72905	1.741	2.12669	2.35551	2.22154	1.83182	1.49596	2.12825	2.3288	1.97649	1.86461	2.02764	1.73094	2.17983	2.17786	2.00233	1.94247	2.28647	2.35047	1.87084	2.28703	2.0443	2.31499	2.05251	2.11924	2.01384	2.04189	1.97005	1.72895
TRAF3IP2-AS1	2.12556	2.1904	2.49608	2.21584	2.46273	2.25281	2.90353	2.21855	2.3945	1.77567	2.10733	2.0947	2.4134	2.44942	2.38501	2.24146	1.88541	2.37023	1.87969	2.44334	1.93051	2.07467	2.34958	2.17187	2.16976	2.24182	1.98996	2.26863	2.1757	2.22252	2.15832	2.25497	1.98956	2.15078	2.25753	2.25402	2.33402	2.28246	2.2721	2.41284	2.45708	2.35201	2.38511	2.1865	2.3616	2.44716	2.12687	3.02984	1.97625
ZNF649-AS1	1.7348	2.07733	2.13768	1.90462	1.99597	1.8212	2.30976	2.07385	2.01797	1.93446	1.76628	1.95532	2.07952	2.15167	2.0497	2.10293	1.65276	1.83478	2.12905	1.94546	1.76849	1.89651	2.24348	1.99548	2.04721	1.8679	1.49596	1.97175	2.10325	2.05597	1.79895	2.33039	2.22051	2.0131	2.0514	2.08083	2.19098	2.04093	2.2297	1.86775	1.80564	1.98443	2.19585	2.16139	2.32354	1.97556	2.00411	1.96853	1.83092
LGALS8-AS1	1.90049	2.0612	2.65404	2.0412	2.22117	2.40123	2.04592	2.14672	1.8847	1.8421	1.79748	2.17313	2.19557	2.10692	2.01838	2.28957	1.86785	2.3416	1.76257	1.87207	1.72905	1.61853	2.01726	1.86357	2.46553	2.10865	1.75957	2.04343	1.87857	2.06266	2.18395	2.08237	1.72931	2.02968	2.17456	2.00628	1.94989	2.67746	1.98075	2.06226	1.95429	2.18217	2.13588	2.11122	2.09812	2.23357	2.69125	2.22927	2.43648
CRTC3-AS1	1.95938	2.16322	2.00338	1.94762	2.14665	2.13493	2.363	2.06504	2.1841	1.89567	1.85376	1.92431	2.31234	2.04442	2.19647	2.28802	1.92252	2.31614	1.72611	2.36873	2.05276	2.17021	2.19806	2.11832	2.02651	2.38235	1.86239	2.07544	2.00899	2.02474	2.08481	2.20332	1.86066	2.26903	2.00822	2.21304	2.05603	2.37776	2.02692	2.0145	1.86868	2.02457	2.10692	2.35952	2.38198	2.17462	2.4333	2.61648	2.00451
RNU6ATAC35P	1.78625	2.015	1.83568	1.97881	2.07632	1.72848	2.6747	1.92095	1.91658	2.06552	1.93804	2.31906	2.00914	2.17673	2.26458	1.90283	1.97843	1.80224	1.70324	1.90354	2.31981	1.57642	2.10244	2.50563	1.98581	1.80236	1.68309	1.91766	1.8515	1.83845	1.79895	2.35388	1.74377	2.20717	2.01722	2.08943	2.12112	1.90101	2.06523	1.8049	2.14682	1.94468	2.05286	2.05251	2.13475	2.28998	2.23928	2.05185	1.72895
C21orf62-AS1	2.0172	2.15022	1.95546	2.05517	2.16902	1.95662	2.1175	2.29805	2.20424	1.75773	1.81799	2.01598	2.38836	2.28072	2.08781	1.97882	1.75693	2.23585	1.75275	2.48638	1.81249	1.85076	2.1169	2.18287	1.98647	2.21984	1.57598	2.12908	1.96087	1.94318	2.07333	2.16893	1.91062	2.2704	2.08559	2.24127	2.09052	2.36969	2.22079	2.1192	2.17224	2.17099	2.06396	2.25555	2.24705	1.92875	2.07527	2.10266	1.95474
LINC00622	1.90243	2.05307	1.89633	1.97159	2.10025	2.06015	2.2236	1.88355	2.13772	1.75146	1.98125	1.92563	2.3616	1.9714	2.30929	1.99482	1.92644	2.0676	1.91218	1.93617	2.15939	1.741	2.03332	1.93858	2.07139	1.82355	1.59161	2.05336	3.24915	1.98644	1.89222	2.24803	2.06367	2.20149	2.50418	1.99664	2.02721	1.92917	1.97427	1.89248	2.22713	2.00663	2.07003	2.06634	2.10519	3.93613	2.2995	1.99366	1.82321
LINC01394	1.84324	2.22773	1.83568	1.82393	2.35748	2.00292	2.02524	1.88355	1.92263	1.60601	1.79836	1.93743	2.11992	2.62434	2.12209	1.90283	1.89338	1.97593	1.8552	1.82155	1.72905	1.57775	2.00127	2.10924	1.98942	1.74986	1.49596	1.91766	2.33788	1.83845	2.26449	2.14112	1.84227	2.00028	1.98154	1.92961	1.95934	1.94719	2.07769	1.8086	2.08553	1.99021	2.05599	2.05251	1.92753	1.88452	2.09106	1.91419	1.80117
JARID2-AS1	1.88052	1.97899	2.25073	1.97428	2.02614	2.12085	2.15284	1.92006	2.06441	1.7457	1.97744	1.95734	3.13304	2.13199	2.13232	2.4803	1.79415	2.32379	1.70324	1.90161	1.87416	1.7183	2.19404	1.88401	2.16174	2.44124	2.02127	2.11408	1.93645	2.67592	1.87976	2.31788	1.7125	2.05137	1.93074	2.1342	1.95352	2.155	1.88805	1.89709	2.21572	2.01481	2.16923	2.0997	2.58544	2.24506	2.19406	1.91419	1.91772
HID1-AS1	1.89659	2.03992	1.83568	1.84704	2.25643	1.80621	2.062	1.94419	2.23734	1.67008	2.12453	1.93871	2.0862	2.01813	2.00195	2.04778	1.71762	1.95729	1.80764	1.91066	2.01192	1.86662	2.07781	2.13821	2.09129	1.86191	1.54938	1.95629	1.94604	2.13854	1.93185	2.21444	1.91908	2.30302	2.21716	2.1354	1.895	2.07195	2.24954	1.75464	2.81705	2.05033	2.14458	2.20486	2.00627	1.96027	2.02296	2.09861	1.766
CCND2-AS1	2.03622	1.97271	1.83568	1.9713	2.03906	2.10901	2.02524	2.18356	2.60879	1.65333	1.81116	1.86387	2.23477	3.08961	1.98486	1.90283	1.81391	2.0537	1.78063	2.01102	1.88696	1.58702	2.04798	2.22857	1.97613	1.98607	1.71777	1.97404	1.92151	2.06467	2.04861	2.21932	1.89285	2.037	2.21095	2.04745	1.895	2.0185	2.0763	1.94595	2.4068	2.07458	2.14189	2.23685	3.50145	1.90907	2.00856	1.91419	1.80934
STAU2-AS1	1.82384	2.03338	2.14209	2.16545	2.07155	2.0057	2.03849	2.03746	1.86643	1.86285	1.72602	1.96281	2.06819	2.1629	2.05146	1.96683	1.90266	2.27562	1.75085	1.83789	1.87392	1.9706	2.17522	1.91594	2.36294	2.06658	1.65259	1.99932	2.0164	2.00713	2.1244	2.09725	1.80559	2.02459	1.93922	1.9462	2.00956	2.42714	1.948	1.85099	1.89452	2.10291	2.0354	2.09032	3.0935	1.97777	3.69213	2.20617	2.35149
LINC00881	2.33963	2.12361	2.01557	1.93507	2.05309	2.09997	2.11787	1.93563	2.17798	1.9914	1.77758	1.96592	2.09379	2.41517	2.0989	1.90283	1.69475	1.90371	2.31695	3.01627	1.74718	1.99362	2.0856	1.94495	2.10157	2.66196	1.59719	2.62035	1.97183	2.0004	2.21093	2.06556	1.97096	2.00936	1.91854	2.2849	1.99828	2.10244	2.07348	1.98564	1.93687	2.15664	2.40309	2.34709	1.94046	1.83289	1.93053	2.58822	2.6246
LINC01135	1.8253	2.06839	2.12252	1.9752	2.33852	2.08776	2.05539	2.08797	1.9078	2.00198	1.89113	1.98622	2.02086	2.02031	2.45886	1.92758	1.78247	2.11111	1.83037	2.27041	1.86219	1.69465	2.08788	1.9039	2.06441	1.94986	1.58239	2.46994	2.14034	2.0653	1.97731	2.25374	2.14661	2.13846	2.02221	2.6704	2.02534	2.30671	2.12041	1.82147	2.21435	2.3335	2.08518	2.09568	2.18465	1.87584	2.0009	2.1236	2.37429
SALRNA1	1.7895	1.97455	1.97976	2.05261	2.31241	1.95015	2.02524	2.05807	1.92176	1.87387	1.68322	2.0859	2.02613	2.3033	2.10297	2.2126	1.65276	2.06845	1.81512	1.82155	1.83598	1.59159	4.08724	1.8652	2.15333	1.8274	1.88501	1.94794	1.92589	1.85142	1.90382	2.11824	2.08866	1.99399	2.08536	2.03568	1.90796	1.98781	1.90136	2.34492	1.79235	1.91712	2.13322	2.08356	2.08466	2.03637	1.89715	2.19289	1.89498
LINC01579	1.7348	1.95095	2.02957	1.77844	1.91022	1.86883	2.0297	2.5199	1.85015	1.60994	1.70491	1.84496	2.15782	2.5206	1.94457	2.33295	1.65673	1.82726	1.85999	2.15478	1.90525	1.56933	2.15765	1.84014	2.14301	2.1287	1.49596	1.93632	1.86317	1.95743	2.28959	2.31317	1.78538	1.98284	1.9818	2.27258	2.07521	2.67889	1.89215	1.80715	1.76992	1.89036	2.05203	2.07482	4.10034	1.85193	2.07773	2.06207	1.92047
MED4-AS1	1.97169	2.08601	1.83568	2.03579	2.00359	1.86521	2.28113	2.03097	2.20247	2.04799	2.00885	1.96295	2.1133	2.09987	2.08005	2.2658	1.7257	2.17237	1.82046	1.95354	1.72905	2.06942	2.02132	1.96386	2.23152	1.91522	1.791	2.18557	1.92315	2.26893	1.93216	2.17029	1.89755	2.16704	1.99455	2.32779	2.20913	1.95929	1.93863	1.83609	2.82589	2.21362	2.23807	2.20522	2.07216	1.9483	1.97413	2.13332	1.81121
SMG7-AS1	2.0431	2.19378	2.07973	1.89231	2.34294	1.92368	2.30934	1.9228	1.95198	1.74149	1.94966	2.0545	2.12936	2.04323	2.17376	2.04941	1.66865	2.08292	1.72909	1.91791	1.88461	1.69628	2.16054	1.93098	2.09771	1.85146	1.77523	1.98223	1.90917	2.11545	1.91696	2.45668	1.77421	2.27399	1.99054	2.17842	2.09704	2.80404	2.02185	1.84568	1.88664	2.27442	2.24914	2.16421	2.11041	2.18926	2.0531	2.23573	2.11877
LINC01134	2.1061	1.99857	1.8943	1.95504	2.01677	1.9305	2.0548	1.98737	1.96727	2.4496	1.94433	2.1544	2.0937	2.07939	2.05867	3.02896	2.09112	1.95347	1.89128	1.9022	1.92082	1.71338	2.2494	1.9437	2.22713	2.51582	1.62632	2.31945	1.87096	2.42417	1.86266	2.16124	1.78826	2.12411	2.16169	2.33505	1.94106	2.08823	2.00661	1.9232	1.83883	1.99213	2.20772	2.13598	2.24006	2.37795	2.09859	2.02794	1.79155
LINC00924	1.8908	2.043	1.87149	1.80663	2.2061	1.8174	2.08074	1.88981	2.69326	1.62087	1.88925	1.8801	2.04879	1.92696	2.09063	1.93944	1.7023	1.88508	1.86639	1.903	2.0105	1.64408	2.04512	2.00792	1.96942	1.77617	1.52866	1.94126	1.9928	1.89802	2.11434	2.10435	1.79736	2.14815	2.14761	2.15503	2.03949	1.89397	2.33223	1.86856	2.08934	2.37363	2.05947	2.13936	1.98774	1.92689	2.05587	2.05097	1.93578
LINC00689	1.81626	1.95615	2.1494	1.7826	1.90237	1.70898	3.30279	1.98464	1.95283	1.62771	1.76721	1.89447	2.01146	1.94852	2.01477	1.91095	1.89663	1.81054	1.71285	1.83377	2.13798	1.58199	1.97112	1.85381	2.5391	1.82806	1.51759	1.93842	1.86448	1.85027	1.83967	2.34783	1.68968	2.23562	2.44863	1.8951	1.94458	2.02668	2.34176	1.77923	1.73748	2.03299	2.02295	2.23999	1.94364	1.83526	2.6701	1.91419	1.77981
LINC00607	2.12047	1.98356	1.87404	1.82844	2.10966	1.74781	2.0625	1.91898	2.03473	1.66184	1.94767	1.89989	2.44591	1.93395	2.01205	1.98439	1.70234	1.98638	1.79069	2.48685	1.85503	1.68045	2.03859	1.97969	1.94068	1.82386	1.58387	2.07339	1.9929	1.98965	1.95786	2.11722	1.90938	2.59648	1.99072	2.06597	2.02423	2.14157	1.98394	1.882	2.30744	2.13591	2.10246	2.09455	1.94789	1.86719	2.03849	3.25467	1.81082
LINC00664	2.0714	1.95478	1.83568	1.78491	1.93796	1.79248	2.11515	1.90622	2.03201	1.62403	1.72873	2.08202	1.97382	1.9192	3.76642	1.95261	1.7568	2.18884	1.76197	1.91989	1.74469	1.68896	2.04842	1.86321	2.20076	1.82831	1.97809	2.1841	1.8515	2.004	1.93373	2.05769	2.13173	1.97626	1.94086	1.92848	1.967	2.04365	1.91154	2.00856	1.80041	1.92309	2.70451	2.60847	2.06115	1.84391	2.13789	2.21754	1.96555
GRPEL2-AS1	2.1803	1.98366	1.89507	1.9146	2.09591	1.96874	2.16919	1.88355	2.31264	1.73336	1.85743	1.83876	2.01288	2.24396	2.12729	1.90283	1.65276	1.9382	1.70324	1.99723	1.89263	2.01925	2.04153	2.06367	2.04323	1.74986	1.74897	1.91766	2.12228	2.02872	1.79895	2.32014	1.81533	2.12037	2.11873	1.93147	2.02453	2.07515	1.956	1.86367	2.09506	1.99374	2.10268	2.05251	1.92753	2.03463	1.94962	1.99202	1.90805
LINC01506	1.94048	2.19734	1.88117	1.91674	2.12446	1.83457	2.02524	2.03523	1.83348	1.65589	1.97988	1.91679	2.03295	1.9192	1.96225	1.90283	1.77585	1.87294	1.70324	2.08151	1.8554	1.76619	2.19159	2.1343	1.97827	2.10776	1.61722	1.97709	1.92527	2.03166	1.93602	2.25581	1.80932	2.01739	2.55082	1.91621	2.13262	1.99486	1.94014	1.75464	2.15838	2.02617	2.11544	2.05251	1.95854	1.83289	1.93732	1.91419	1.78596
TMC3-AS1	2.1119	2.12418	2.00551	1.88741	2.08908	2.04191	2.4508	2.30274	2.15969	1.78273	1.9196	2.17223	2.16117	2.05209	1.99594	2.49818	1.77748	2.01223	1.75149	2.36942	2.05078	2.15812	2.18624	2.00692	2.13587	1.94695	1.7376	2.00931	1.93743	2.09615	1.85396	2.15444	1.9029	2.22036	2.25437	2.26318	2.02953	2.24537	2.29918	2.04352	2.05924	2.25563	2.10628	2.35763	2.16379	2.3981	2.1712	2.44513	2.14043
ITGA9-AS1	1.9398	2.04945	1.96496	2.01847	2.10393	2.12369	2.18082	2.17362	2.17286	1.86104	1.95694	1.95447	2.15946	2.10442	2.23364	2.03828	1.72026	2.12904	1.79013	2.27663	1.79705	1.77402	2.23464	2.30836	2.43585	2.11941	1.68918	2.04612	2.20539	1.9448	2.09133	2.32275	2.17166	2.1895	2.03936	2.09316	2.11791	2.09688	2.44775	2.07208	2.11436	2.22973	2.08597	2.12296	2.08476	1.91226	1.96941	2.1079	1.87117
RSF1-IT2	1.85308	2.15632	1.87801	2.21207	1.92032	1.78985	2.12869	2.10369	1.89907	1.78332	1.68322	2.02492	2.08186	2.30503	2.05219	2.14483	1.81094	2.10487	1.81567	1.82155	1.92033	2.50728	2.04636	1.9165	2.15436	1.8314	1.49596	2.02624	1.8515	2.1012	1.86427	2.08396	1.93126	1.96979	1.92229	2.04413	2.19711	2.07352	1.93652	1.90681	1.84729	1.98701	2.41892	2.23349	2.0396	1.94359	2.04116	1.96976	1.782
LINC00551	1.82924	1.98215	1.83568	1.77844	2.27041	1.6814	2.04332	1.88355	1.9218	1.67629	2.25211	1.83876	2.00209	2.0276	2.0617	1.93233	1.66084	1.92274	1.70324	2.31183	1.75655	1.63145	2.03857	2.13185	1.94997	1.98568	1.50919	1.91766	1.8515	2.13235	1.88691	2.41797	1.78722	2.17569	2.65548	2.07522	2.10675	1.89277	2.07598	1.76819	2.08246	2.14591	2.50055	2.06553	1.96654	1.92123	2.27872	1.95213	1.77408
SMIM2-AS1	1.83193	2.00701	2.14698	1.82217	2.19913	1.84165	2.02524	2.1852	1.94283	2.5139	2.36005	1.89825	2.07073	2.30612	1.98992	1.9987	1.77336	2.25974	1.70324	1.9637	1.74436	1.83689	2.01031	2.21423	2.00154	2.14732	2.37402	2.02985	2.17069	1.8653	2.75566	2.05969	1.75904	2.15606	2.40948	1.92718	1.98259	1.97279	2.12679	2.05349	1.94065	2.0124	2.03565	2.19732	1.96539	2.1606	2.07765	2.37543	2.09113
ZNF295-AS1	2.13459	2.09059	1.93892	1.86011	2.26847	1.93783	2.17325	2.02456	1.96649	1.67298	1.85425	1.87944	2.15936	2.02256	2.00491	1.99125	1.72056	1.99806	1.71934	2.18415	1.72905	1.58493	2.03244	2.03801	2.22995	1.88288	1.78943	2.232	1.90877	2.33902	1.8534	2.0513	1.75221	1.9791	2.45427	2.22935	1.93433	2.63452	2.38525	1.97084	1.84362	2.00325	2.2428	2.20437	2.18198	1.8799	1.97369	2.00535	1.87806
SCOC-AS1	1.91593	2.06	1.97958	1.91439	2.01831	1.816	2.14598	1.99114	2.13145	1.94064	1.82958	1.99872	2.15322	2.22258	2.22284	2.03104	1.9507	2.66357	1.71237	2.09022	1.86641	1.76352	2.11646	2.13368	1.97306	2.39762	1.55015	2.50726	2.05171	2.11479	2.22984	2.18105	1.86201	2.4952	2.18109	2.31226	2.0346	2.36917	2.05202	2.09694	2.14043	2.05282	2.14644	2.33906	2.04572	2.31787	2.01655	2.39609	1.90777
CDKN2B-AS1	1.9913	2.14397	1.90313	1.86182	2.02184	1.70633	2.21983	2.24145	2.01883	2.02052	1.80666	1.87491	3.46843	1.93394	1.98416	1.99953	1.65914	2.32289	1.73934	1.83917	1.86991	1.89963	2.10222	1.9112	1.9524	2.44868	3.26061	2.20442	1.89786	2.01962	1.79895	2.06935	1.75	1.98477	2.06207	2.15289	2.01822	1.91588	2.07369	2.46573	1.88677	1.95641	2.43076	2.26805	1.99984	1.94647	1.9173	2.39943	1.89946
HIF1A-AS1	1.90295	2.06298	1.94342	1.8637	2.11116	2.07785	2.31904	1.95896	1.99844	1.62634	1.75721	1.90204	2.02171	2.04184	1.97778	2.01289	2.06477	1.91466	1.70324	2.03479	1.76413	1.77691	2.10531	1.90525	1.97034	1.74986	1.49596	2.14372	1.96873	1.91952	1.96324	2.14719	1.70337	1.96979	2.31229	1.90666	1.97603	2.07195	1.88805	2.0944	1.83165	2.02136	2.2021	2.66954	1.97725	2.01998	1.96143	2.05467	2.06254
USP2-AS1	1.97286	2.43009	1.85091	1.90132	1.92312	1.89272	2.06918	1.96595	1.91865	1.73721	1.72926	2.30191	2.37313	2.08069	1.96771	1.98402	1.82135	2.10443	1.76668	1.98499	1.76269	1.7331	2.01613	1.99118	1.996	2.00925	1.6504	2.06411	1.88456	2.03558	1.94246	2.07795	1.82733	2.00413	1.97733	2.00041	2.23415	2.19983	2.14988	1.84699	1.81785	1.99841	2.23635	2.63938	2.38638	1.97598	2.07872	2.42961	2.11298
KBTBD11-OT1	1.76306	2.07664	2.80003	1.80167	2.18852	2.06792	2.02524	2.0765	1.87935	1.6223	1.82759	1.93871	2.20712	2.86235	1.98588	2.41153	1.65276	1.82543	1.70324	1.86679	1.86453	1.56833	2.0962	1.85993	2.61753	1.8347	1.54938	1.91766	1.8515	1.96607	1.79895	2.17897	1.78159	2.0159	2.02832	1.99204	2.02256	2.27427	2.35237	1.8359	1.81082	2.12483	2.0791	2.05251	2.11688	2.07731	2.11627	2.23086	1.83736
HCG9	1.95041	1.94382	1.93628	1.83197	1.97651	2.00621	2.10945	2.08512	2.21298	1.69833	1.91164	2.02679	2.16472	2.11407	1.93658	1.97216	1.67194	1.95699	1.70324	2.02113	1.82501	1.61546	2.00819	1.86496	2.14287	2.02674	1.90677	2.00607	1.8515	1.9505	1.85199	2.5155	1.86931	2.10839	2.07573	2.32203	1.895	2.19127	2.07472	1.81811	2.03442	2.14236	2.06402	2.22842	1.92753	2.34879	1.92744	1.91419	1.75063
LINC00592	1.84209	2.18606	1.83568	2.18931	1.96654	1.74121	2.02524	2.00704	1.90447	1.68075	1.68322	1.94265	2.11839	1.93905	2.10863	1.90283	2.98435	2.48693	1.80521	2.47416	1.87649	1.60103	1.96223	1.87705	1.93675	1.83807	1.51705	2.06294	2.27764	1.88961	2.06303	2.18947	1.6954	2.12018	2.28882	2.05818	2.04328	2.16435	1.94053	1.75464	1.76998	2.04241	2.09913	2.38691	1.97415	2.13224	4.41403	1.91419	1.92071
TTN-AS1	1.8243	1.97562	1.92469	1.92673	2.16352	1.73592	2.22013	1.91497	2.09667	1.80547	1.84514	1.91046	2.23596	2.31743	2.22233	2.32091	1.77926	1.84497	1.84842	2.10693	1.8422	1.89908	2.10813	2.03067	1.96753	1.94622	1.78937	2.21914	2.07267	2.03733	1.88427	2.37372	1.75087	2.1579	2.08975	2.09932	1.95806	2.22244	1.93326	2.04	2.05596	2.08308	2.26019	2.06723	2.21472	2.06714	1.94911	2.05462	1.8544
LINC01465	1.82765	2.18895	2.10888	1.97154	2.22159	1.85654	2.05619	2.26271	1.99973	1.76235	1.88527	2.00296	2.70322	2.17479	2.10853	2.26367	2.00905	2.33091	1.84398	1.98563	1.99033	1.92672	2.13661	1.93063	2.20677	1.93346	1.75672	2.11707	2.04338	2.48313	1.9818	2.23052	1.88999	2.02766	2.15205	2.03543	2.24193	2.13839	2.35147	1.90986	1.91138	2.02257	2.20358	2.18157	2.26682	2.45854	3.09014	2.42405	2.02703
STEAP3-AS1	1.90502	2.03169	1.85071	2.00318	1.99145	1.97872	2.02524	1.98937	1.9578	1.71001	1.77268	1.92359	2.04128	2.17409	2.01487	1.94094	1.67774	1.85458	1.73712	1.93349	1.8061	1.72848	2.12535	2.04943	2.18301	1.76454	1.59581	2.05022	2.07988	2.23485	1.91193	2.11105	1.72913	2.02413	2.0857	1.95497	1.92011	1.96031	1.9804	1.80321	1.83997	1.9421	2.17828	2.16344	2.05965	1.93068	1.98122	1.96317	1.82545
LINC01347	2.50105	2.02579	1.98583	2.41495	2.08372	1.98465	2.20341	2.01333	2.06166	1.85147	1.83593	2.01429	2.13034	2.11687	2.25662	2.22094	1.708	2.01413	1.96514	1.94306	1.77648	1.73317	2.06091	2.01001	2.14581	1.86276	1.59093	2.23019	2.01775	2.0731	2.0093	2.21396	1.86652	2.48073	1.97859	2.12717	1.99739	2.13696	2.04613	1.9988	1.81592	2.08077	2.63735	2.21365	2.20407	1.98812	2.08028	2.01104	1.91194
LINC01352	1.89481	2.02564	1.93339	1.8557	2.08338	1.97966	2.087	1.88355	2.15114	1.68695	2.16071	1.92388	2.06958	1.98284	2.14708	1.9536	1.66674	1.95261	1.70324	2.13527	1.88839	1.64137	2.13798	2.05015	2.02606	1.89081	1.56352	1.95046	1.93198	1.99877	2.01742	2.06104	1.98301	2.14408	2.22206	2.21144	2.05524	1.98928	2.51359	1.8011	2.22896	2.16511	2.04964	2.09719	2.16415	2.08104	2.17948	1.94714	1.90812
DSG2-AS1	1.98714	2.11706	2.03715	1.79718	1.9692	1.76304	2.11252	1.94059	1.90666	1.77391	1.8006	1.86628	2.13681	2.34463	2.35449	2.23093	1.89222	2.20257	1.7462	2.01199	1.8497	1.74551	2.04843	1.94996	2.0824	1.9469	1.53914	2.37351	2.0359	1.95454	1.97465	2.10579	1.8267	2.06117	1.99267	1.95598	1.96061	1.95755	2.06918	1.92383	1.75978	1.9354	2.19606	2.16651	2.02213	2.03287	2.04781	2.17442	1.85201
LINC00189	1.7976	2.03057	1.94339	1.79589	1.98337	1.73889	4.17113	1.88355	2.05942	1.63036	2.12999	1.96262	2.15218	1.93827	2.09098	2.09521	1.83916	2.14406	1.83874	1.8556	1.79158	1.99801	2.00665	1.92002	1.95699	1.89517	1.49596	1.94672	1.92295	2.00369	1.79895	2.12869	1.79353	2.03839	2.01137	1.86612	2.10408	1.94293	1.98723	1.83587	2.00669	1.93079	2.11218	2.09212	1.95755	1.87229	2.02894	2.6225	1.74295
WWTR1-IT1	1.88175	2.01392	1.93966	2.11646	1.87955	1.81625	2.02524	1.92038	2.26671	1.63531	1.789	1.83876	2.17092	2.09331	2.05264	1.95692	1.71149	1.92375	1.70324	1.9023	1.72905	2.5104	1.99802	2.13422	2.0318	1.80156	1.63643	2.05266	2.16737	2.06142	1.95761	2.09798	1.88442	2.20377	2.01529	1.98036	1.95402	2.0885	1.94862	1.85198	1.92454	1.98024	2.72888	2.19085	2.13175	1.97051	1.9439	2.04981	1.91929
CATIP-AS2	1.7348	1.97378	2.12315	2.06835	2.04469	1.79589	2.08088	2.00416	2.09271	1.67898	1.93708	1.91551	2.19358	2.03169	2.03502	2.11821	1.67781	1.93812	1.70324	2.01764	1.85337	1.66058	1.99246	1.96554	2.16602	1.91726	1.8278	1.91766	1.92406	1.88839	1.93382	2.25226	1.75848	2.19003	2.09705	2.29623	2.33016	2.33104	1.88805	1.75464	1.81212	1.96305	2.08014	2.16999	1.98789	2.02271	2.21892	1.91419	1.72895
UXT-AS1	1.8224	2.1396	2.3022	2.10831	2.06412	1.93317	2.083	2.38453	2.12217	1.76147	1.87775	2.00204	2.16594	2.03589	2.32811	2.15326	1.74593	1.96535	1.87786	2.06626	1.93796	1.67825	2.18709	2.07192	2.11208	2.10253	1.7578	2.07411	1.95106	2.03551	2.02505	2.26031	1.75277	2.08076	2.1488	2.21846	2.01314	2.28501	2.22475	2.02218	1.87312	2.37365	2.22797	2.16132	2.55053	2.00487	2.17395	2.24641	2.16184
LINC00472	1.78785	2.59221	1.89109	1.79498	1.93946	1.75362	2.06007	1.97812	2.14038	1.62144	1.98094	1.86706	2.20743	1.99015	2.07964	1.97328	1.67612	1.92932	1.716	1.89576	1.78834	1.80137	2.0181	2.39808	1.98733	1.91884	1.62527	1.96328	2.31274	1.95228	1.87386	2.19672	1.76883	2.0559	2.13888	1.93455	2.03049	1.93864	2.21962	1.90483	2.41957	2.00425	2.26403	2.06513	1.98849	1.86408	2.01655	2.18511	1.75971
LINC01091	1.77024	2.16893	2.17402	1.8479	2.15775	2.10452	2.04076	2.14406	1.88621	1.63321	1.78457	1.87093	2.08569	2.00004	2.04779	2.05722	1.682	1.99032	1.72575	2.97748	1.77302	1.84046	2.13435	1.96966	1.98438	1.92495	1.61625	1.95011	2.1674	1.91003	2.07268	2.13821	1.86278	2.01964	1.97016	2.03504	2.1621	2.19967	2.09175	1.97611	1.81189	2.20604	2.054	2.12901	1.94439	1.92478	2.00844	2.23778	1.84234
CYP1B1-AS1	1.85747	1.993	1.87433	1.85578	2.02869	1.87846	2.09291	1.91484	2.11521	1.66742	1.764	1.89613	2.04454	2.0529	2.02872	1.95527	1.6708	2.12839	1.83616	2.07041	1.82526	1.88269	2.04952	2.05699	2.25337	2.22839	1.59938	2.03687	1.93964	1.98416	1.92529	2.13284	1.98903	2.12827	2.29863	1.99352	2.03403	2.04936	2.21516	1.8576	2.05167	2.06441	2.05839	2.12398	2.09856	1.86745	2.10825	1.95243	1.81272
ZBED3-AS1	1.86078	2.03272	2.32179	1.89122	2.13234	1.898	2.32948	2.08157	2.0339	1.65691	1.87064	1.93549	2.13404	2.05746	2.02422	2.01865	1.78631	2.01134	1.78979	2.21194	1.81975	1.70395	2.05934	1.95167	2.09605	1.82468	1.89187	2.21511	1.92677	1.91966	1.94981	2.24672	1.80564	2.08261	1.99991	2.13799	2.14459	2.13344	2.01744	1.9144	1.95878	2.03187	2.03194	2.17106	2.11485	2.08951	2.08534	2.40969	1.86347
STK24-AS1	1.84005	2.09984	2.35689	1.9737	2.33168	2.14641	2.04879	2.04529	1.94772	1.91507	1.84776	1.97511	2.84295	2.08846	2.16307	2.16852	1.82222	2.04841	1.70324	1.93427	1.8169	1.89958	2.08477	1.90676	2.27518	2.44412	2.24929	2.10476	2.15896	2.2113	1.99251	2.05286	1.84744	2.02835	2.23559	2.09814	1.97763	2.06335	1.90971	2.14189	2.13397	2.04895	2.2316	2.34521	2.2396	2.19191	2.22563	2.03449	1.96062
RN7SL832P	2.00018	2.02454	2.05372	1.89331	2.06676	2.19518	2.10917	2.21586	2.01609	1.76423	1.7654	1.9467	2.44736	2.04431	2.15906	2.18479	1.82661	2.58017	1.74045	1.86359	1.75518	1.64742	2.04366	2.01951	2.1257	2.76525	2.09674	2.00578	2.02235	2.43787	2.20866	2.13465	1.86871	2.10794	1.99753	2.05207	1.97037	2.08522	2.20105	1.98153	1.85603	2.02895	2.1453	2.16025	2.39642	2.62939	2.16379	2.67647	1.99105
RBM26-AS1	1.93715	2.32858	2.06331	1.99118	2.10461	2.02763	2.51504	2.19712	2.18288	2.0157	1.90899	1.93666	2.21514	2.17377	2.30382	2.04786	1.80336	2.07065	1.80001	2.09403	2.14026	2.04952	2.05922	2.16778	2.02283	2.33122	1.84169	2.17445	2.19917	2.02214	1.95202	2.20306	1.93182	2.02968	2.29233	2.01551	2.12881	2.09337	2.31098	2.04958	2.07285	2.21748	2.12784	2.19653	2.16256	2.26944	2.40323	2.20746	2.14148
UBE2R2-AS1	1.83879	2.04064	1.94422	2.25199	2.11281	2.05541	2.24257	1.93464	2.28368	1.81677	1.86283	1.9435	2.09156	1.95109	2.03822	2.24342	1.82951	1.88801	1.70324	1.82155	1.7989	2.28748	2.10636	1.90582	2.27144	1.82144	1.85788	2.01308	1.8515	1.9593	1.85625	2.21579	1.8455	1.98933	1.91794	2.05971	1.9364	2.42459	1.97181	1.92025	1.72432	2.02249	2.20349	2.24193	1.97762	1.93019	1.92989	2.09995	1.8856
ERI3-IT1	2.12711	1.99523	1.94895	2.10783	1.95325	1.87394	2.02524	1.98837	2.11166	1.66929	1.79845	1.90533	2.02422	1.98509	2.08299	1.94244	1.65276	1.97606	1.70324	1.82155	1.76598	1.88915	2.0141	2.02186	2.19796	1.74986	1.49596	2.01725	1.97472	1.88171	1.79895	2.10434	1.85248	2.0302	2.01178	2.10505	1.98023	2.3841	1.97549	1.89439	1.72432	1.92317	2.12884	2.08734	2.12631	1.86754	1.89715	1.91419	1.82454
LINC01393	1.79698	1.96141	2.28813	1.78883	2.07088	1.85616	2.05803	1.97268	2.0274	1.73167	1.73633	2.57939	2.09043	1.95301	2.89982	2.03263	1.79341	1.89305	1.9467	1.92043	1.75413	1.66729	2.27426	1.88372	2.19137	1.77557	1.67791	2.12822	1.87309	2.33609	2.54161	2.46157	1.7198	2.25879	1.94115	2.72398	1.99537	1.91949	1.90321	1.81539	1.89862	2.0739	2.38501	2.09944	1.92753	1.9248	2.2021	2.24195	2.3776
RAMP2-AS1	1.84229	1.99348	2.26621	1.81015	2.05386	1.77992	3.24401	1.88758	2.26367	1.66253	2.06224	1.90146	3.27553	1.97805	2.04366	2.68804	1.66888	1.90375	1.964	1.87449	1.8153	1.88266	2.09692	2.17121	2.18966	1.77806	2.33241	1.95544	1.94399	2.03339	1.90392	2.18278	2.0029	2.12595	2.11885	1.92905	2.12363	2.00421	2.06427	1.87981	2.95892	2.08713	2.14172	2.17302	1.98948	1.94796	2.02499	4.4842	1.81788
L3MBTL4-AS1	2.04117	2.06535	1.87093	1.96231	2.01078	1.79145	2.08344	1.89992	2.04083	1.84055	1.79949	2.01344	2.00456	1.92937	2.08831	1.97401	1.72373	1.8838	1.80732	2.02623	1.80624	2.11757	2.10669	1.93727	1.96891	2.11704	1.63054	2.02301	1.94574	2.01358	2.00546	2.17133	1.84383	1.98835	2.22795	1.97958	1.98518	1.93946	1.95473	2.00865	1.90242	2.14921	2.17782	2.15553	2.05116	1.88504	2.04641	2.18515	1.81605
RMDN2-AS1	1.93926	2.39383	2.41384	1.80152	2.04126	1.86932	2.02524	2.30318	1.9974	1.81748	1.72044	2.04217	1.97382	2.10951	1.95309	1.9179	1.66097	1.90315	1.92695	1.95239	1.91418	2.08644	2.08165	1.95557	2.52239	2.22607	1.67376	2.02084	1.91091	2.17658	2.10884	2.28959	2.00885	2.35548	1.95898	1.92219	2.24603	2.18385	1.94636	1.83537	1.83096	1.91483	2.2559	2.23938	2.06177	1.84606	1.91015	1.91419	1.86238
LINC01473	1.98453	2.12223	2.02404	1.97503	2.29703	2.03107	2.0665	2.428	2.22158	1.82745	1.79801	1.92348	2.20592	2.19355	2.20193	2.31716	1.76913	2.89288	1.71838	2.52352	1.95064	2.03988	2.06027	2.18618	2.14947	2.36658	1.70889	2.14147	2.23501	1.99803	2.16549	2.17661	1.79348	2.11974	1.95498	2.13521	2.10399	2.32765	2.10223	2.08866	2.03827	2.11327	2.2634	2.19569	2.08876	2.0022	2.11611	2.21277	1.98885
SIAH2-AS1	1.83659	2.08373	1.99226	1.90277	2.03056	2.09715	2.09247	1.9579	2.14242	1.77706	1.73828	1.93136	2.23639	1.96575	1.96715	2.1123	1.95577	1.9655	1.84601	1.90408	1.97023	1.947	2.10335	2.09297	2.03389	1.95056	1.68429	2.29724	1.93907	1.83845	1.96101	2.02764	1.86093	2.39217	2.176	2.03785	2.01325	2.09329	2.06636	1.75464	1.83017	1.90668	2.32083	2.28091	2.23002	2.01746	2.03602	2.05274	1.72895
LINC01572	1.90972	2.10186	1.99535	1.98399	1.93273	1.8737	2.15349	1.90812	2.05531	1.72976	1.70391	1.96067	2.11682	2.2371	2.15687	2.06587	1.83177	2.17172	1.81057	1.8908	1.78167	1.69786	2.01292	1.85026	2.06173	1.89697	1.59515	2.08846	1.88463	2.12309	1.95709	2.19536	1.75667	2.05306	1.94936	2.2545	2.0261	2.23415	1.90555	1.86942	1.85574	1.94325	2.26736	2.16725	1.95162	2.04097	2.12601	2.28156	1.81636
FAM66B	1.74867	2.18043	2.07036	1.81791	1.99403	2.02519	2.02524	2.04994	1.93239	1.62586	1.86411	1.98288	2.06144	1.94398	2.02368	1.98248	1.71224	2.09095	1.70324	1.95025	1.77007	1.59567	2.17571	2.07464	2.0392	1.80565	1.50918	1.96467	1.89842	1.87065	1.83253	2.08958	1.72745	2.09391	2.00303	2.10257	1.99709	2.05757	1.99278	1.9335	1.72432	1.9344	2.13107	2.29834	2.12994	2.06646	1.95994	1.92376	1.86438
HCFC1-AS1	2.13795	1.98937	2.08979	1.83197	2.89358	2.05389	2.10945	2.46835	1.93811	1.64365	2.05515	1.99109	2.01848	1.97761	2.25026	2.16212	1.69087	1.95699	1.70324	1.82155	1.72905	1.6469	2.09594	1.90014	2.11516	1.81614	1.49596	1.91766	1.8515	2.05447	1.79895	2.07335	2.00338	2.00571	2.14958	2.4296	2.04247	2.01118	1.96564	2.09927	1.72432	2.18353	2.26024	2.11356	1.92753	1.89362	2.01468	2.08669	1.96985
ARRDC3-AS1	1.96224	2.10083	1.87798	1.95579	2.087	1.88407	2.1186	2.26732	2.09076	1.67952	1.8482	1.93941	2.12281	2.13122	2.2236	2.09176	1.7762	2.03766	1.74924	2.27227	1.81629	2.15183	2.15129	2.17968	2.14747	1.88576	1.68644	2.31847	2.09657	2.09301	1.93884	2.14868	1.85423	2.13122	2.17044	2.16437	2.05813	2.19315	2.10701	1.98398	2.08553	2.20524	2.16985	2.12026	2.22626	2.01281	2.29761	2.20078	1.93961
DSCAS	1.81655	2.00124	1.83568	1.81255	1.92126	1.82746	2.0791	1.91366	1.83348	1.69947	1.77007	1.83876	2.08431	2.02817	2.18497	2.03174	1.83615	2.11127	1.74259	2.17962	1.72905	1.70558	2.1812	1.8289	2.12434	1.98686	1.49596	2.08116	1.92176	2.0228	1.79895	2.08526	1.87154	2.05904	1.95822	1.9138	1.895	2.21624	1.93764	1.83452	1.9657	1.98971	2.0446	2.09145	2.06942	2.18008	2.35766	2.07843	2.04996
COL4A2-AS1	1.89753	2.0026	1.9648	1.88076	1.96372	1.72023	2.13348	1.88355	2.35834	1.63052	1.8558	1.88991	2.11379	1.99448	2.16913	1.99207	1.65276	1.93692	1.74353	1.82155	1.85226	1.79586	2.13329	2.34137	2.26555	1.79317	1.6142	2.03126	2.11984	1.98209	1.79895	2.17079	1.78218	2.03883	2.15844	2.00786	2.08343	1.95965	1.93881	1.91374	2.30674	2.05139	2.23885	2.13116	1.95775	1.87254	2.04774	1.91419	1.83801
WWC2-AS2	1.95197	2.13792	1.92213	1.82997	2.10716	1.89793	2.11942	2.0576	1.98214	1.6659	1.94199	1.96803	2.05167	2.02068	2.69923	2.01242	2.00292	1.92758	1.76264	1.96826	1.79132	1.60881	2.00647	1.9736	2.01574	1.85471	1.53604	2.03011	1.92267	2.036	1.91539	2.14211	1.82247	2.23048	2.20849	1.91442	2.04837	2.01339	2.15559	1.86476	2.28673	2.11926	2.19875	2.10165	2.05055	1.90087	2.2674	1.9288	1.81727
LINC01301	2.05389	2.07319	1.9364	1.86217	1.96172	2.12421	2.1117	1.94674	1.96458	1.84697	1.75411	2.03718	2.08421	1.99269	2.07441	1.96329	1.73002	2.12829	1.75222	2.41623	1.84456	1.95473	2.02011	1.86875	1.99077	1.93101	1.55485	2.29588	1.90446	1.89857	1.94503	2.17411	1.75299	2.04812	2.02171	1.97118	2.03524	1.93748	1.95574	2.03777	1.79372	2.12273	2.2076	2.84428	2.58347	1.91854	2.06162	2.14769	1.95838
XXYLT1-AS1	1.78778	2.01709	1.89101	1.77844	2.30039	1.77678	2.02524	2.03182	2.07624	1.60601	1.73953	2.13282	2.04567	2.01291	1.93658	1.95938	1.65276	1.80224	1.75354	1.98567	1.72905	1.61471	2.03615	1.8289	2.85577	1.74986	1.49596	2.05863	1.8515	1.83845	2.04074	2.13656	1.68206	1.99902	1.97772	1.98545	2.01588	2.45389	1.88805	1.95135	1.72432	2.22832	2.09645	2.32825	1.92753	1.83289	1.94603	2.41251	1.86433
PTCSC2	1.84452	1.94382	1.83568	1.8691	1.87955	2.04744	2.52349	1.88355	1.83348	1.67	1.68322	1.83876	2.04961	1.9192	4.1562	1.90283	1.65276	2.2758	1.70324	2.14872	1.72905	2.08561	1.96223	2.05995	1.93675	2.66619	1.49596	2.06618	2.03455	1.83845	2.12893	2.02764	1.68206	2.03087	1.88713	1.99189	2.02241	2.03172	1.88805	1.75464	1.72432	1.95133	2.0105	2.05251	2.08077	1.83289	2.09328	1.91419	1.72895
LINC00310	1.83742	1.99714	1.87948	2.02399	2.15181	1.86943	2.19114	1.9389	2.0779	1.6967	1.79219	1.90166	1.98347	1.98145	2.08639	1.92539	1.77138	2.20956	1.78178	2.14729	1.76392	2.01892	2.09996	2.05891	2.27804	1.7856	1.62523	2.0209	2.25173	1.99537	2.07132	2.11419	2.17286	2.0343	2.22997	2.09258	1.99887	2.09991	2.07899	1.99043	2.02931	2.11887	2.16487	2.15524	2.1025	2.03625	1.94849	1.98105	1.88774
LSAMP-AS1	1.7348	1.94382	1.83568	1.77844	1.92126	1.79231	2.22959	1.88355	1.90058	1.60601	2.00304	1.83876	2.85016	1.9192	1.93658	1.99003	1.72429	1.8363	1.85459	1.82155	1.72905	1.69968	1.99149	1.8289	2.49465	1.74986	1.49596	1.91766	1.8515	1.83845	1.99078	2.02764	1.68206	2.08052	1.88713	1.86612	1.895	1.85962	1.88805	1.79513	1.76746	2.18199	2.0105	2.05251	2.17366	1.87162	2.41291	1.91419	1.78323
LMO7DN	1.77412	1.95763	2.11855	1.85799	2.15275	1.73502	2.05101	1.89789	1.98767	1.6174	1.86248	1.88616	2.02723	2.10357	1.98254	2.22587	1.67574	1.88167	1.70324	2.05788	1.72905	1.60624	2.05708	2.1426	2.02869	2.4956	1.83335	1.91766	1.8515	1.99295	1.79895	2.02764	1.74081	1.98065	1.97097	1.99776	2.11086	1.95243	2.10927	1.77397	2.08909	1.95532	2.40821	2.05251	1.94159	1.85137	1.95121	1.99435	1.74199
POT1-AS1	2.04258	2.0455	2.58789	1.90309	1.94487	1.81645	2.16726	2.14189	2.20812	1.67222	1.83582	1.88701	2.01601	2.05794	2.01237	2.02378	1.94313	2.10884	1.94734	2.05679	1.83181	2.23146	2.01817	1.88458	2.93943	1.82328	1.54099	2.15517	2.03509	1.92222	1.95246	2.13685	1.76405	2.19378	1.99783	2.03451	1.97466	1.92609	2.00285	1.88541	1.80282	2.05128	2.34658	2.61576	2.07887	1.94227	2.08195	2.44099	1.84542
BCDIN3D-AS1	2.06905	2.07334	2.07273	2.01818	2.15225	2.28703	2.21528	2.10092	2.05858	1.70316	1.80873	2.0499	2.44859	2.08397	2.3183	2.168	2.10252	2.26631	1.90393	2.13065	1.97754	1.80729	2.04633	2.059	2.39366	1.91837	1.88406	2.13991	2.00911	1.99628	1.98658	2.11129	1.83733	2.18383	2.13438	2.02187	2.03223	2.4898	2.157	1.93869	1.93155	2.14451	2.14749	2.51688	2.21056	2.28626	2.10286	2.51888	1.87485
TARID	1.76118	1.94793	1.93717	1.77844	1.98844	1.72925	2.06709	1.88355	2.44932	1.61616	1.76878	1.8459	2.03316	1.94289	1.94866	1.94949	1.93457	1.86625	1.71442	1.85917	1.76109	1.59483	1.99308	1.96233	1.93956	1.80612	1.58882	1.91766	1.86159	1.9093	1.83693	2.20448	1.74987	2.01442	2.05621	1.96176	2.10379	1.90169	2.05223	1.81959	2.31505	2.0166	2.02979	2.10966	1.93589	1.91343	2.22054	1.93041	1.73671
KCNIP2-AS1	1.93858	1.98144	1.864	1.90725	2.10821	1.99476	2.19356	1.9226	2.22276	1.9898	1.87387	1.96535	2.42005	2.26655	2.19963	2.11962	1.80362	2.20972	1.98524	2.10111	1.83409	1.6559	2.19278	2.07693	2.21986	1.9084	1.69092	2.33808	2.14695	2.01862	1.92661	2.12022	1.74646	2.15241	2.14675	2.22699	2.15735	2.17374	1.9833	1.88239	2.14193	2.18353	2.09763	2.31048	2.05731	2.43063	2.19248	2.05771	2.02113
LINC00628	1.80522	2.45661	1.89118	1.80776	1.9504	1.6814	2.02524	1.88355	1.89124	1.64685	1.7023	1.92347	2.42491	1.96696	1.93658	1.97797	1.77342	1.98268	1.72026	1.82155	1.81618	1.62293	2.07207	1.8289	2.35209	1.76816	1.62743	2.08132	1.8515	1.99802	1.91178	2.12515	1.69287	2.02786	1.90267	1.88677	1.895	1.94389	1.90953	1.82344	1.72432	1.89431	2.20419	2.15069	1.94026	1.86619	2.18277	1.93885	1.76411
IPO9-AS1	1.93873	2.03018	2.04823	1.85147	1.96859	1.83924	2.24573	1.93543	1.97534	1.77395	1.79531	2.00532	2.26609	2.11778	2.0887	2.1029	1.70486	1.99779	1.86677	2.03945	1.74711	1.76008	2.13152	1.907	2.28981	2.1676	2.19861	2.10531	1.91269	2.12754	1.91306	2.19603	1.73597	2.03809	1.94904	2.06255	1.97789	2.26516	2.0728	1.9848	2.1062	2.28597	2.12563	2.11946	2.43513	1.97862	1.94675	2.18843	2.14345
NR2F2-AS1	1.98749	2.08375	1.85163	1.9335	2.15616	1.812	2.26031	1.89736	2.13739	1.63866	1.87412	1.93734	2.08223	1.98643	2.159	1.95911	1.74767	2.11978	1.73562	2.15147	1.8322	1.80062	2.03836	2.13196	1.96211	1.92307	1.65839	2.29526	1.95902	1.86069	1.95824	2.13854	1.84351	2.13243	2.13674	2.06027	2.1033	1.94034	2.07348	1.83477	2.09247	2.15452	2.12251	2.32705	1.95447	1.87523	2.20473	2.02609	1.80749
STX18-AS1	1.92036	2.09478	2.13645	2.21935	2.03901	2.0562	2.54187	2.16319	2.11509	1.72751	1.93541	1.9345	2.15897	2.14341	2.06256	2.28026	1.82176	2.21704	2.15538	2.14934	1.88009	1.78973	2.15954	2.05683	1.97964	2.29392	1.73011	2.35206	2.13472	1.99042	2.02225	2.28085	1.87686	2.17356	2.18425	2.14831	2.0825	2.30069	2.14285	1.98762	1.99143	2.11411	2.17847	2.38608	2.21542	2.21204	2.15951	2.49432	2.03674
LINC01082	1.7348	1.98009	1.83568	1.77844	1.98196	1.6814	2.02524	1.88355	1.91713	1.69407	1.89186	1.83876	2.07796	2.01085	2.13811	1.90283	1.7419	1.88618	1.70324	1.90408	1.78062	1.59428	2.06934	1.99307	1.93675	1.8537	1.49596	1.91766	1.93907	2.01246	1.79895	2.16801	1.86093	2.28024	2.24892	1.86612	2.12255	1.98118	1.88805	1.80524	3.05918	1.94519	2.13482	2.10117	1.92753	1.83289	1.9912	1.98513	1.72895
AADACL2-AS1	1.77097	1.96911	1.83568	1.80819	1.98608	1.71448	2.02524	2.27557	1.83348	1.60601	1.68322	1.83876	2.24637	1.95169	1.93658	2.01572	1.65276	1.97193	1.70324	1.82155	1.72905	1.60909	2.01281	1.90724	1.93675	1.85787	1.56418	1.91766	1.91287	1.83845	1.96739	2.19653	1.70393	1.96979	1.88713	1.98752	2.20219	2.12686	2.05389	1.75464	1.72432	2.14499	2.06939	2.33279	1.97855	1.83289	2.02619	1.96382	1.82221
LINC01588	2.06065	2.23566	2.46474	2.02849	2.26163	2.19291	2.0508	2.04139	2.51854	1.90077	1.93358	2.04783	2.19438	2.05718	2.1363	2.13332	1.90825	2.45699	2.00898	2.04701	1.98388	2.09794	2.13851	1.93023	2.20773	2.20706	1.79299	2.23669	2.20481	2.5337	2.30811	2.17417	1.83073	2.02809	2.19668	2.1449	2.06882	2.80115	2.0165	2.10673	2.16683	2.12979	2.38042	2.37029	2.13795	1.93667	2.9604	2.13679	2.19502
LINC01397	1.7348	1.94382	1.91731	2.10193	1.87955	1.6814	2.07673	1.88355	1.95905	1.60601	1.68322	1.88652	2.00098	2.05659	1.93658	2.10293	1.76501	2.07168	1.91545	1.82155	1.72905	1.69363	2.01761	1.8289	2.24561	1.74986	1.49596	2.02389	2.04431	1.83845	1.924	2.08272	2.33255	1.96979	1.88713	1.91169	1.895	1.92262	1.88805	1.79334	1.80564	2.01232	2.04309	2.22966	2.03718	2.13609	1.89715	2.25756	1.83092
SLC16A1-AS1	2.15195	2.06671	1.86364	1.84346	2.05608	1.86842	2.51962	1.92557	2.32207	1.77348	1.83206	1.92797	2.4505	1.94972	2.00129	2.09884	2.32774	2.11409	1.77148	1.86824	1.80291	1.95969	2.01808	1.97262	1.95765	1.86079	1.66795	2.32327	2.20734	1.95158	1.94323	2.14462	1.81469	1.99113	2.26982	2.0443	1.99208	1.98943	1.94579	1.96198	2.00673	2.09313	2.22715	3.15052	1.98722	2.56759	2.06767	2.62021	1.82424
LINC01194	1.7348	1.94382	3.24076	1.87701	1.87955	1.72613	3.57256	1.88355	1.83348	1.60601	1.68322	1.83876	3.86342	1.93031	1.93658	1.91606	1.65276	3.50369	3.63666	1.82155	1.7657	1.76822	1.96223	1.8289	1.94854	1.74986	1.49596	1.91766	1.8515	1.83845	2.71173	2.0363	1.68206	2.0492	1.88713	1.88038	1.895	1.85962	1.88805	1.77872	1.72432	1.86712	2.0105	2.05251	1.92753	2.10681	2.05946	5.61973	1.7371
FARSA-AS1	1.7348	1.94382	1.93319	1.85554	2.06175	1.84777	2.25739	1.88355	2.35651	1.60601	1.96245	1.89595	2.03823	2.22958	1.99204	2.00245	1.65276	1.80224	2.02954	1.82155	1.72905	1.55859	2.0285	1.8289	1.93675	1.74986	1.74858	2.04435	1.8515	2.04807	1.79895	2.21698	1.84655	1.96979	2.11838	1.86612	1.895	2.26204	1.88805	1.75464	1.82146	2.07205	2.23043	2.22315	1.92753	1.83289	1.89715	1.91419	1.79105
ADAMTS9-AS2	1.77288	2.03915	1.93943	1.92869	2.01238	1.75305	2.12652	1.90663	2.07917	1.6207	1.95673	1.88091	2.04241	1.9978	2.0349	1.91652	1.66207	1.84636	1.76884	2.17368	1.813	1.9708	2.01548	2.36325	2.04303	2.31334	1.61087	2.15327	1.9678	1.88651	1.86038	2.14624	1.83958	2.2018	1.98669	2.12036	2.36265	1.92267	2.16455	1.81912	2.14033	2.05062	2.05212	2.05853	1.95687	1.86847	1.93516	1.94055	1.74368
ZFY-AS1	1.7348	1.94382	1.92452	1.95855	1.87955	1.6814	2.02524	4.17987	1.83348	1.68751	1.68322	2.02102	1.97382	1.97069	1.95359	1.90283	1.65276	1.80224	1.75763	1.82155	1.72905	1.55859	2.04211	1.98113	1.93675	2.69867	1.49596	1.9572	1.8515	1.90519	1.79895	2.02764	1.68206	2.03238	1.88713	1.86612	1.895	1.85962	1.88805	1.75464	1.72432	1.86712	2.0105	2.05251	1.92753	1.96318	2.43105	1.91419	1.72895
LINC01587	1.81258	2.02499	2.03075	2.12643	2.05001	2.2601	2.02524	3.21294	1.86575	1.69495	1.74564	1.85079	1.9874	2.00615	1.93658	1.96551	2.07294	2.08394	2.00946	2.11204	1.88	1.64387	2.00375	1.87216	2.01095	1.74986	1.60598	1.91766	1.95063	2.17076	1.89327	2.09582	1.70591	2.02346	1.92134	2.15713	1.91815	3.66612	1.88805	2.18928	1.93674	2.07877	2.29257	2.26162	1.92753	1.94066	2.05399	2.43945	2.4722
FAM66C	1.87722	2.16863	1.98894	1.85422	2.1024	1.98456	2.11364	2.02771	2.12737	1.68133	1.86273	1.98764	2.18861	1.98483	2.04902	1.98068	1.73176	2.39963	1.72672	2.07178	1.8158	1.84279	2.06704	2.03784	2.37946	1.91795	1.79178	2.04848	2.05065	1.86159	1.88555	2.13513	1.81397	2.01284	2.05429	2.13792	2.03385	2.45165	2.11981	2.0289	2.19456	2.10776	2.15457	2.46863	2.18004	2.01221	2.22476	2.14862	1.98393
STK4-AS1	1.99199	2.19515	1.97047	1.99278	1.94599	1.84652	2.2304	2.0883	1.83348	1.82174	1.83118	2.09392	2.59505	1.96886	2.02612	2.0295	1.74161	2.16723	1.81622	1.97621	1.85769	1.73765	2.10529	1.91304	2.02013	2.14029	1.57942	2.07837	2.25284	2.0914	1.92177	2.11172	1.83009	2.24405	1.96315	1.92961	2.00882	2.04571	2.0172	1.84004	1.7818	1.97439	2.15964	2.24054	2.12151	2.07431	2.11802	2.27017	1.89657
LINC00322	1.83131	2.03366	1.93642	1.85812	1.87955	1.71149	2.14995	1.88355	2.08241	1.64371	1.75235	1.87843	2.33374	1.94875	2.38531	1.93796	1.74635	1.80224	1.85299	2.0214	1.88583	1.65973	1.98542	1.86501	2.1154	1.81624	1.52734	1.91766	1.8515	1.87683	1.79895	2.35863	1.74091	2.05808	1.99805	2.04617	2.35679	1.9375	1.88805	1.78677	1.792	1.91687	2.03755	2.05251	2.04091	1.95205	2.14962	2.00314	1.75066
DNM1P35	1.81289	2.08872	1.87331	1.81975	2.28622	2.00274	2.07207	1.9045	1.92578	2.00571	1.78801	1.90343	2.17347	1.95794	1.962	2.07877	1.70276	1.88359	1.82271	1.97732	1.75067	1.61084	2.13592	1.92204	2.19679	1.80107	1.55057	2.04226	2.03864	1.86381	1.93471	2.13092	1.7338	2.00917	1.90596	2.00243	1.98584	2.83098	2.18018	1.9846	1.85496	2.07357	2.04598	2.22645	2.29135	1.95679	1.95641	2.00199	1.90911
LINC00111	1.81351	2.10365	1.87735	1.87474	1.91969	1.85527	2.02524	2.04923	1.83348	1.65171	1.72564	1.83876	2.08023	1.95504	1.98321	1.94542	1.65276	1.83501	1.70324	1.88527	1.72905	1.55859	1.96223	1.87268	1.97478	1.9428	1.67698	2.0246	1.8515	2.01616	1.86327	2.05564	1.68206	2.0134	1.88713	1.86612	1.895	2.1521	2.02673	1.75464	1.72432	2.09436	2.13751	2.1265	2.21283	1.83289	1.93394	1.91419	1.7553
LINC00677	1.92131	1.94382	1.83568	1.81076	1.95755	1.94656	2.17329	1.94005	1.89709	1.69465	2.08717	1.86264	2.12834	1.9192	1.95972	2.20851	1.67572	1.86607	1.70324	1.82155	1.80624	1.67195	2.12109	1.87202	2.18052	1.74986	3.14318	2.12119	1.8515	1.92867	1.8623	2.02764	1.70583	1.99142	1.88713	1.91131	1.94079	2.61319	1.93505	2.06796	2.35296	2.11682	2.13564	2.12539	1.92753	1.86959	1.96873	2.667	1.90152
HEXA-AS1	1.8027	1.99145	1.88919	1.88828	2.15712	1.94882	2.04774	3.08441	1.98173	2.23802	1.79014	1.85962	2.06575	2.19512	2.07717	2.05267	1.86385	1.94454	1.72777	1.94233	1.81308	1.64913	1.99245	1.9124	2.15886	2.00902	1.8538	2.21803	2.01982	2.0724	1.95929	2.20462	1.77326	1.99338	2.0839	1.97231	1.97403	2.09087	2.40042	1.82098	1.82902	1.99966	2.0733	2.12411	2.1966	2.00835	2.02724	2.04032	1.98489
HOXC-AS3	1.7348	1.94382	3.51897	1.79067	1.92402	2.22223	2.17354	1.88355	1.91656	1.6103	1.68322	1.95596	2.79017	1.9192	1.93658	3.47997	1.65276	1.80224	1.70324	1.88057	1.78026	1.55859	3.19613	1.8289	3.79396	1.74986	1.49596	1.91766	1.8515	1.88152	2.30645	2.05355	1.68655	1.96979	1.88713	1.87472	1.895	3.47392	1.88805	1.83283	1.73209	1.97137	2.0105	2.05251	1.92753	1.83289	2.44649	2.2281	1.83331
LINC01167	1.7348	2.07204	1.83568	1.77844	2.09508	1.6814	2.07463	1.88355	1.83348	1.60601	1.8748	1.83876	1.99987	2.22889	1.95896	1.90283	2.07638	1.83345	1.70324	1.82155	1.76688	1.57172	2.1161	2.133	1.93675	2.03432	1.85208	1.91766	1.8515	1.83845	1.86024	2.02764	1.8148	1.96979	1.88713	2.03356	1.9393	2.32962	1.88805	1.93134	1.98077	2.03294	2.0105	2.31601	1.92753	1.83289	1.9322	1.91419	1.8734
CASK-AS1	1.8224	1.97493	1.88213	1.85072	1.96768	1.94468	2.02524	1.94745	2.03933	1.60601	1.7305	1.83876	1.97382	2.10875	2.11083	2.04081	1.67877	1.83878	1.70324	1.82155	1.81627	1.87816	1.99362	1.8289	2.13726	1.74986	1.65869	2.34379	1.92681	2.03551	2.00397	2.11935	1.81192	1.96979	1.96333	2.0144	1.94682	2.39733	1.94123	1.8812	2.02081	1.99836	2.2173	2.09428	2.05024	1.83289	1.89715	1.97515	1.87028
CCDC144NL-AS1	1.89603	2.04771	1.9782	1.80434	2.22221	1.84248	3.95211	1.93527	2.01148	1.66484	1.80167	1.8821	2.1857	2.01014	1.97601	2.12331	1.76342	1.93566	1.73946	2.05758	1.84642	1.66892	2.11815	1.98511	3.33328	1.81122	1.66947	1.92389	2.15579	1.88553	2.2167	2.06685	1.84986	2.03549	2.11958	1.95015	1.97511	2.76326	2.01342	1.81339	1.91485	2.08954	2.13386	2.06102	1.94834	1.90938	2.02732	2.00533	1.97328
BEAN1-AS1	1.98155	2.03462	1.90435	1.85025	2.3062	2.33046	2.05421	1.99288	2.10024	1.70547	1.86253	1.905	2.06287	2.87107	2.08622	1.94999	1.69134	1.94224	2.12456	1.95925	1.75121	1.67151	2.27299	1.92427	2.56713	1.77257	1.51719	2.00715	1.92631	2.0112	2.00268	2.04323	1.74801	1.99413	1.98114	2.08183	1.94647	2.10685	1.9147	1.93937	1.99984	2.02835	2.04685	2.21177	2.10675	2.30979	1.99694	1.91419	1.98503
MKNK1-AS1	2.03434	1.98303	1.85543	2.00217	2.07609	1.95022	2.09786	1.93093	2.27214	1.65433	1.85481	1.88404	1.99956	2.05743	2.14387	1.99154	1.68555	2.11621	1.80764	1.91066	1.81185	1.85491	2.05917	2.08668	2.11551	1.82552	1.57537	2.1127	1.9307	1.94556	1.85953	2.1609	1.86967	2.02093	2.02832	2.07975	1.96018	2.19792	1.95494	1.94573	1.90994	2.03108	2.21402	2.11368	2.0503	2.05465	1.93179	1.99081	1.84892
LINC01014	1.77449	1.97158	1.91744	1.77844	1.87955	1.6814	2.02524	1.88355	1.83348	1.62892	1.68322	1.83876	2.17834	1.9192	1.93658	1.98637	2.28612	1.83484	1.77763	1.88494	1.72905	1.55859	2.12265	2.07245	1.93675	1.82975	1.49596	2.21588	1.91879	1.88473	1.86294	2.16181	1.68206	1.96979	1.88713	1.95602	1.895	1.85962	1.93553	1.75464	1.72432	2.09327	2.10631	2.16157	2.06356	1.86997	2.42007	1.91419	2.07957
LINC00398	1.80982	2.04729	1.93921	1.86034	2.07266	1.93852	2.05835	2.13825	1.8748	1.60601	1.73685	1.92898	2.00845	1.98668	2.06596	1.98287	1.68229	1.84371	1.79749	2.30823	1.80375	1.80639	2.03265	1.91115	2.0314	2.03432	1.52023	2.01964	1.8515	1.83845	1.88011	2.06308	1.94924	1.99762	2.0549	2.13528	1.98228	1.95901	1.9776	1.75464	1.85213	2.18165	2.16989	2.212	1.98112	1.85666	2.01081	2.20201	1.81098
LINC00316	1.83357	2.07962	1.83568	1.85999	1.97891	1.77191	2.57354	1.88355	2.20008	1.89723	1.78811	1.83876	2.2863	1.96434	1.96622	1.90283	1.68216	1.96075	1.70324	1.82155	1.77906	1.576	1.96223	1.93709	2.11946	1.74986	1.80224	1.98615	2.01668	1.83845	1.79895	2.60799	1.68206	2.33815	2.01421	2.72752	1.95352	2.60948	1.9481	2.32442	1.77659	1.97928	2.13115	2.05251	1.96332	1.87983	1.89715	1.91419	1.76218
CDC42-IT1	2.00939	1.94382	1.87039	2.2255	2.1557	1.93426	2.06844	1.93137	2.25831	1.75261	1.78672	1.93692	1.99658	2.14224	1.99447	2.07209	1.67216	1.88258	1.73478	2.02329	1.79446	2.11737	1.98566	1.96956	2.05945	1.78376	1.64792	1.96305	1.96221	2.02261	1.79895	2.09644	1.74149	2.05895	2.05203	2.20928	1.93374	2.46642	2.0042	1.96779	1.79267	2.05837	2.26288	2.05251	2.06386	1.98178	1.92779	1.9598	1.89573
EIF1AX-AS1	1.79505	1.98605	1.8986	1.96748	1.87955	1.8409	2.02524	1.88355	2.02163	1.60601	1.68322	1.83876	2.01522	1.9192	1.97218	2.02869	1.65276	1.80224	1.81548	2.00726	1.78904	1.71314	1.96223	1.95817	2.154	1.74986	1.49596	1.91766	2.04813	1.90863	1.89568	2.02764	1.68206	1.96979	1.98998	2.00142	1.96515	1.95504	1.88805	1.92446	1.787	1.9578	2.19952	2.26676	1.92753	1.88921	1.89715	1.91419	1.72895
LINC01213	2.27082	1.97018	1.83568	1.77844	1.87955	2.2269	2.02524	1.88355	1.83348	1.60601	1.68322	1.88421	1.99966	1.9192	2.32635	1.98223	2.05669	2.50627	1.70324	1.88178	1.76658	2.31852	1.96223	1.8289	1.97268	2.0322	1.63474	2.61142	1.8515	1.92508	2.27133	2.02764	1.72731	1.96979	1.88713	1.86612	1.93894	1.85962	1.88805	1.96263	1.72432	1.89588	2.65648	3.74668	1.98069	1.83289	1.93191	2.61059	2.72332
GSN-AS1	2.0096	2.02643	1.87097	1.93764	2.05076	1.87718	2.03792	1.95589	2.14112	1.69301	1.83593	1.88237	2.03899	1.9666	2.07816	2.03726	1.68364	1.91384	1.84012	1.86798	1.77215	2.00652	2.11821	1.91736	2.1958	1.82748	1.62078	2.0458	2.19237	1.9108	1.9496	2.0878	1.78961	1.99889	2.02423	1.96928	1.97274	2.07721	1.91129	1.85589	1.88759	2.03521	2.20863	2.14996	1.96174	1.89533	1.94581	1.9928	1.79485
LINC00449	1.88655	1.96228	2.04308	1.98223	1.90614	1.88557	2.54555	2.06465	1.83348	1.65122	1.76595	1.9172	2.29849	1.98925	2.05647	2.27729	1.68343	1.92775	1.70324	1.82155	1.7812	1.5677	1.99924	1.96848	1.96194	1.90461	1.61784	1.98906	2.06343	1.95806	1.84168	2.11795	1.72942	2.16092	2.12123	2.01219	1.92583	1.96275	2.12368	1.8793	1.75183	1.94606	2.07471	2.10172	2.1865	2.24197	1.99224	2.35445	1.72895
ITCH-IT1	1.84249	1.94382	1.94807	2.0304	1.87955	1.6814	2.16424	1.96225	2.15904	1.60601	1.79756	1.83876	1.97382	1.9192	2.06199	2.223	1.65276	1.89107	1.70324	1.82155	1.72905	2.73458	1.96223	1.94683	1.93675	1.74986	1.78489	1.91766	2.03124	1.96357	1.79895	2.02764	1.68206	1.96979	1.98088	1.98957	1.895	2.31671	1.88805	1.85988	1.72432	1.94975	2.0105	2.1538	2.00471	1.93365	2.08975	2.06066	1.80066
CACTIN-AS1	2.01059	2.05774	1.93393	1.82748	2.0082	2.16721	2.05662	1.90969	2.16861	1.66748	1.83067	2.03753	2.07012	2.15048	2.11712	2.0032	1.8131	1.97126	1.81418	1.841	1.76491	1.63818	2.09284	2.05133	2.26662	1.79866	1.7982	2.33486	1.89253	2.09789	1.83796	2.07774	1.82806	1.99616	1.93885	1.90756	2.00438	2.45741	1.95919	2.01463	1.98954	1.98259	2.14382	2.44905	2.01936	2.02392	2.02567	1.96362	1.93011
OPA1-AS1	1.91079	2.06863	1.83568	1.81634	2.01431	1.91752	2.19771	1.88355	1.97876	1.60601	1.68322	1.92122	2.0666	1.9192	2.04228	1.90283	1.65276	2.11167	1.70324	1.82155	1.72905	3.02613	1.96223	1.92825	2.02326	1.74986	1.49596	1.98048	1.8515	1.99387	1.79895	2.02764	1.73731	1.99517	1.92711	1.91908	1.895	1.93276	1.94312	1.92672	1.77224	1.9366	2.12134	2.3312	1.92753	2.03624	1.89715	2.03778	1.7594
LINC01374	1.7348	1.94382	1.83568	1.77844	1.93487	1.91708	2.02524	2.20885	2.23096	1.89636	1.68322	1.87225	2.21944	2.62165	2.09206	1.96152	1.83605	1.89128	1.70324	1.99164	1.72905	1.73441	2.00109	1.9471	1.93675	2.49323	1.8286	2.318	1.8515	2.07923	1.88732	2.10392	1.7154	2.02987	2.02589	2.10381	1.95903	2.02898	2.34518	2.05044	2.25531	1.94995	2.05577	2.2489	2.18188	1.83289	2.04429	1.91419	1.96628
OVOL1-AS1	1.89528	2.18297	1.87074	1.77844	1.91332	1.82872	2.02524	2.21168	1.99092	1.62537	1.97647	1.87923	1.97382	2.29279	1.99505	1.90283	1.80258	2.00923	1.91271	1.92697	1.72905	1.57017	2.35648	1.86574	2.69806	1.74986	1.52798	2.42336	2.11626	1.83845	1.90535	2.02764	1.74209	1.96979	2.00023	1.94234	1.895	1.96458	1.92821	1.78742	1.79335	1.89271	2.24171	2.08402	2.02075	1.92496	1.9281	1.91419	1.87734
LINC01385	1.7348	2.34072	1.83568	1.77844	1.87955	2.29374	2.17305	2.41818	1.83348	1.60601	1.68322	1.83876	2.43942	1.9192	1.93658	2.31567	1.65276	1.80224	1.70324	1.91453	1.72905	1.55859	1.98303	1.8289	2.35329	1.74986	1.68242	1.91766	1.95014	1.83845	1.8928	2.02764	1.69989	1.96979	1.88713	1.86612	1.895	1.85962	1.88805	3.28912	1.75504	1.88962	2.62005	2.08022	1.92753	1.83289	1.92436	2.64138	2.10635
PLCH1-AS2	1.84452	1.94382	1.83568	1.95439	1.87955	1.9208	2.02524	1.88355	2.0086	1.60601	1.68322	1.87281	1.97382	2.06499	2.09459	1.90283	1.65276	1.97794	2.03935	1.82155	1.72905	2.05594	2.00174	1.89023	2.65037	1.74986	1.54932	2.06618	1.8515	1.83845	2.12893	2.17879	1.71596	2.03087	1.88713	2.05089	2.02241	1.94823	2.01872	1.91264	1.78249	1.95133	2.0105	2.10504	1.92753	1.83289	1.99854	1.91419	1.83724
LEMD1-AS1	1.84737	1.96693	1.84439	1.83233	2.00827	2.17486	2.02524	1.8956	1.9388	1.68992	1.76958	1.84884	1.97952	2.54291	1.9512	1.90283	1.65276	1.82265	1.70324	1.87444	1.72905	1.69009	2.07523	2.14903	1.93675	1.8328	1.59608	1.92909	1.93494	2.13756	2.16879	2.07931	1.76518	1.97891	1.9919	2.16931	1.91441	2.32051	2.00368	1.81853	1.76722	1.97139	2.01734	2.11397	2.16735	1.99514	1.91248	1.93707	2.01712
HCG17	1.79482	2.00646	2.07156	2.03151	2.10725	2.00595	2.14047	1.9696	2.10625	1.74025	1.77787	1.92852	1.99459	1.94643	2.24277	1.93521	1.8207	1.99031	1.73202	2.24602	1.84618	1.66621	2.16295	1.92655	2.04903	2.03296	1.66143	1.91766	2.0474	1.90836	1.94118	2.58834	1.8556	2.03536	2.10821	2.00091	2.06374	2.18775	2.09329	1.9502	1.84661	2.06296	2.08403	2.05251	2.60775	2.14077	2.08236	2.18321	1.91757
DLG1-AS1	1.84065	2.00008	1.8641	1.8008	1.98604	1.80168	2.16189	2.28047	1.89922	1.71961	1.69776	1.86345	2.19896	2.08208	1.99953	1.98829	1.95413	1.97187	1.70324	2.17305	1.82169	1.68196	1.97184	1.90244	1.93675	1.90893	2.03575	2.02648	1.96447	1.85441	1.79895	2.04671	1.77795	2.03588	2.04472	2.05844	2.07569	1.93467	1.98363	1.78121	1.73855	1.96794	2.32328	2.07805	1.94687	1.89558	2.17267	2.02352	1.79943
ZNF30-AS1	1.77154	1.96951	2.01814	1.86727	1.91652	1.81136	2.16403	1.96213	1.95017	1.60601	1.72229	1.86108	2.20778	2.01603	2.04167	1.90283	1.65276	1.89093	1.70324	1.82155	1.72905	1.6288	1.98814	1.94665	1.93675	1.89432	1.72516	1.96784	1.8515	1.83845	1.85822	2.05342	1.76896	2.00996	1.98074	1.86612	1.895	2.20308	1.93201	1.85972	1.97286	1.92264	2.09932	2.12072	1.97936	1.96553	1.96414	2.06044	2.01642
SNRK-AS1	1.79552	1.96526	1.86774	2.05545	2.02769	1.91621	2.41321	1.94933	2.06678	1.74179	1.77897	1.87577	2.03596	2.02639	1.99008	2.02965	1.67067	2.14046	1.92122	1.87065	1.78951	1.58541	2.00517	1.86259	2.02276	1.84183	2.13143	2.00035	1.95394	1.90918	1.79895	2.13212	1.89024	2.00334	1.91374	1.90143	1.9657	2.08897	1.88805	2.14948	2.0157	1.91354	2.15563	2.05251	1.97085	2.02247	1.95319	1.95632	1.78886
LYPLAL1-AS1	1.79766	2.03065	1.90132	1.88022	1.94279	1.84756	2.10673	2.38825	1.93476	1.69537	1.90462	1.87708	2.03815	1.94774	2.02774	1.96991	1.67131	2.10931	1.70324	2.10271	1.85161	1.62991	1.98463	1.99542	1.96703	1.84502	1.61357	2.19728	1.90547	1.87552	1.94772	2.17681	1.86348	2.19706	2.04513	2.19572	1.895	2.30002	2.2296	1.81605	1.78971	2.11358	2.08749	2.19588	2.07876	2.00242	2.01093	2.00016	2.13181
RAD21-AS1	1.85677	2.00689	1.87152	1.84343	2.0444	1.87871	2.08441	2.08626	1.85225	1.8442	1.74351	1.99127	2.17957	2.17532	2.05372	1.96337	1.81781	2.11626	1.70324	1.96343	1.7744	1.97004	2.03362	1.87889	2.00142	1.86338	1.63272	2.02473	2.03711	1.99226	2.05672	2.17364	1.80225	2.04385	2.00266	1.96906	1.97391	2.00088	2.13027	1.86341	1.85111	2.0332	2.07548	2.44055	2.35716	1.98642	2.0099	2.29111	1.81748
LINC00605	1.80757	2.01482	1.86655	1.77844	1.92392	1.96525	2.22503	1.90498	1.90482	1.63988	1.83392	1.8567	1.98397	1.9192	1.94529	1.93439	1.72055	2.37927	1.70324	2.02316	1.74383	1.5789	2.05369	1.84522	1.9509	1.79486	1.6951	1.91766	1.95026	1.87293	2.19914	2.15726	1.69101	2.22384	1.91276	1.90013	1.94639	2.10143	1.94079	2.50041	1.82922	1.99731	2.10531	2.08026	1.95894	1.90093	2.99104	1.91419	1.93871
LINC00365	1.8177	2.03287	1.89914	1.87091	1.96296	1.69551	2.02524	1.93861	1.93143	1.63248	1.83212	1.98575	2.14818	1.99379	1.94564	1.9437	1.69716	1.92408	1.70324	2.00877	1.75961	1.6834	2.01048	1.87091	1.95875	1.74986	1.69597	1.95962	1.91642	1.9349	1.9429	2.12207	2.07236	2.16043	1.93342	1.96962	2.10547	1.89646	1.97823	1.75464	1.91332	1.9696	2.14996	2.11659	1.96016	1.85445	2.26156	1.92484	1.74417
NAV2-AS2	1.7348	1.96439	2.06515	1.82645	1.96664	1.7607	2.02524	1.88355	2.09892	1.60601	1.88932	1.87428	2.05282	1.94564	2.03751	1.93427	1.65276	1.96348	1.86329	1.9143	1.72905	2.00155	2.08249	1.86122	2.01934	1.7799	1.49596	1.91766	1.8515	1.97121	1.79895	2.04828	1.71742	2.03347	2.45487	1.96547	2.0277	2.01754	1.88805	1.75464	3.4073	1.99684	2.0347	2.05251	1.94846	1.83289	1.92429	1.91419	1.72895
NEXN-AS1	1.87949	1.99928	1.93804	2.05083	1.93955	2.06217	2.23443	1.89815	1.99035	1.62338	1.78735	1.89883	2.05463	1.97281	2.0287	1.93501	1.68772	2.16757	1.77826	1.85387	1.78842	1.68977	1.99745	1.88361	2.03935	1.81071	1.56215	2.08818	1.91936	1.99563	1.9403	2.11701	1.75354	1.97533	2.02933	2.00006	1.9068	1.8918	1.92411	1.84116	1.79645	1.9927	2.19767	2.10854	2.01815	1.99402	1.95218	2.02198	1.80688
LINC01208	1.77885	1.94382	2.05234	1.83247	2.23652	1.95931	2.16424	1.94685	1.83348	1.6688	1.68322	1.90481	1.98901	1.97817	1.94962	2.03954	1.72871	3.43847	1.74506	2.08425	1.72905	2.04867	1.99332	1.8289	1.99929	1.77251	1.61856	1.97776	1.8515	1.83845	1.93753	2.02764	1.74783	1.96979	1.90637	1.86612	1.895	1.89504	1.88805	1.8187	1.77016	1.88403	2.04674	2.1538	2.30243	1.85362	1.91761	2.00384	2.36162
SNHG22	2.02616	2.01095	1.94402	1.93192	2.08917	1.87297	2.25221	1.9408	2.21709	1.79397	1.91221	1.8972	2.12481	2.18318	2.17796	2.03989	1.88352	2.08801	1.72016	1.8782	1.78165	2.17079	2.07145	2.11416	2.27763	1.87266	1.73938	2.04706	2.0249	2.05243	1.97709	2.10691	1.81599	1.97469	2.34868	2.02272	2.03472	2.06064	2.06027	2.06118	2.16372	2.11705	2.34998	2.11832	1.98366	2.37728	2.03872	1.98654	1.96259
SLC7A11-AS1	1.75728	1.94907	1.9237	1.78462	1.89467	1.70195	2.02524	1.91862	1.85793	1.60818	1.69124	1.84104	2.08535	2.01421	1.93879	2.00032	1.69172	1.85985	1.70324	1.83967	1.83061	1.58831	1.96752	1.8413	2.12527	1.75371	1.53502	2.00313	1.88345	1.92826	1.79895	2.12456	1.7046	2.01454	1.90662	1.88342	1.8994	1.89843	1.91497	1.762	1.73996	1.86999	2.22325	2.12842	1.92753	2.01161	1.96176	1.92972	1.73884
DIAPH2-AS1	1.794	2.21193	1.86692	1.77844	1.9775	1.89487	2.02524	1.89805	1.882	1.74374	1.7766	1.86889	1.9943	2.02375	1.94833	1.93477	1.73801	1.85093	1.70324	1.88502	1.75882	1.7646	1.99027	2.05393	1.98395	1.80037	1.57083	2.57284	1.90232	2.02589	1.83134	2.11637	1.69413	1.97529	1.9636	1.91183	1.92988	1.88364	1.94723	1.92162	1.88307	2.04696	2.54917	2.2385	1.9628	1.87002	1.94282	1.9687	2.55003
FSIP2-AS1	1.76099	1.94382	2.06509	1.82118	2.03088	1.84124	2.05932	1.9398	1.95748	1.6211	1.71108	1.83876	2.07819	2.01105	1.95198	2.1842	1.72759	2.181	1.70324	1.98249	1.72905	1.70505	2.08672	1.94064	2.21107	1.77659	1.59341	1.91766	1.89605	1.86901	2.30183	2.15146	1.69788	2.02652	1.93221	1.86612	1.92555	1.94197	1.9501	1.87822	1.85574	1.90677	2.07414	2.10128	1.96453	1.95124	2.24204	2.64251	1.90848
LINC01571	2.0009	1.94382	1.93408	1.77844	1.99714	1.6814	2.02524	1.91836	1.87271	1.60601	1.75895	1.83876	2.71218	1.9192	1.93658	1.92863	1.65276	2.02379	1.70324	1.86025	1.72905	1.58789	2.07732	2.22436	1.93675	1.95785	1.49596	1.91766	1.8515	1.83845	1.79895	2.21865	1.68206	1.96979	1.88713	2.16887	2.05635	1.85962	2.31486	1.75464	1.74946	2.08982	2.18001	2.07518	1.92753	1.85545	1.96294	1.91419	1.83691
DLEU2L	1.86602	1.96642	2.00336	2.07797	1.98121	1.9678	2.16353	1.89768	2.0604	1.67921	1.79052	1.85449	2.04356	2.02661	2.00031	1.97111	1.67165	2.02071	1.70944	1.88342	1.81133	1.9221	2.0296	1.96597	2.03899	1.82151	1.68842	2.03816	2.03033	1.92742	1.85118	2.12914	1.81007	2.00865	2.03769	2.04996	1.9622	2.22789	1.97928	1.88874	1.86072	2.0492	2.25668	2.16469	1.97318	2.08953	1.92698	2.03525	1.81658
LINC00621	1.81175	2.12467	2.21495	1.81051	2.03043	1.76896	2.02524	2.07097	1.83348	1.62852	1.68322	1.93128	2.02679	2.34578	2.26633	2.09991	1.6642	1.80224	1.82882	2.13498	1.76787	1.7596	2.09482	2.03119	1.93675	2.0411	1.49596	2.02223	1.8515	1.83845	2.11508	2.055	1.95237	1.96979	1.92096	1.93288	1.96265	1.89096	1.97988	1.90128	1.7649	1.91152	2.0105	2.36776	1.95528	1.88719	2.05235	3.2745	1.80488
LINC01143	1.7348	1.94382	2.69081	1.77844	1.87955	1.6814	2.11923	1.88355	1.83348	1.60601	1.68322	1.86108	3.39204	2.04691	1.93658	1.90283	1.65276	1.80224	1.70324	1.82155	1.99859	1.55859	1.98814	1.90846	2.00596	1.74986	1.8691	1.91766	1.8515	1.83845	1.96993	2.02764	1.72617	1.99001	1.88713	1.86612	1.93783	2.76142	1.88805	1.75464	1.72432	1.89515	2.0105	2.05251	2.05376	1.83289	2.41091	2.10607	1.86877
MACC1-AS1	1.84005	1.94382	1.83568	1.92056	1.951	1.80864	2.02524	1.93527	1.83348	1.68724	1.72144	1.9033	1.97382	1.9192	1.95774	1.90283	1.65276	2.07334	1.70324	1.82155	1.72905	3.18476	2.0125	1.8289	2.19047	1.74986	1.53026	1.96676	1.97102	1.83845	1.9664	2.102	1.74632	1.96979	1.88713	1.94768	1.93691	2.41065	1.88805	2.12824	1.76173	1.92145	2.28196	2.11926	2.00294	1.96275	1.89715	1.96352	1.79902
FOCAD-AS1	1.84077	1.98161	2.31946	2.10062	1.87955	1.6814	2.02524	2.13814	2.00274	1.83864	1.68322	1.93517	1.97382	1.9677	2.03012	2.01581	1.65276	1.93144	1.70324	1.90749	1.78277	1.63374	2.03751	1.99965	1.9882	1.90911	2.40074	2.06117	1.8515	1.96158	1.79895	2.10251	1.80869	1.96979	2.02338	2.09966	1.895	1.90304	1.88805	2.04537	1.93687	2.06239	2.05493	2.05251	2.52534	1.88332	2.04164	1.91419	1.86677
CHL1-AS1	1.77473	1.97174	2.23914	1.79496	1.87955	1.85541	2.02524	1.99618	2.04809	1.60601	1.7046	1.85095	1.98757	1.97267	2.02846	1.90283	1.66447	2.03177	1.72232	1.85379	2.27594	1.65858	2.03166	1.8289	1.93675	1.74986	1.58938	1.94517	1.8515	1.90774	1.83149	2.11011	1.69419	2.01343	1.98868	1.86612	1.91845	2.21708	1.88805	1.77427	1.74524	1.94211	2.02701	2.05251	1.92753	1.97663	2.05593	1.91419	1.84403
LINC01068	2.10154	1.98789	1.83568	1.80457	1.87955	1.76687	2.06656	2.72297	1.93476	1.74644	1.78229	1.85805	2.01702	2.0301	1.95527	2.06501	1.72557	1.82832	1.76293	2.4085	1.72905	1.68328	2.11219	2.17278	2.42531	1.74986	1.49596	2.00323	2.10317	1.94692	1.79895	2.04992	2.1557	2.08789	1.91469	1.86612	2.00342	2.02947	1.92608	2.03845	1.85227	1.98439	2.0105	2.05251	1.92753	1.89164	1.92645	1.91419	1.74992
RAET1E-AS1	1.7539	1.98343	1.91389	1.80965	1.87955	1.6814	2.02524	2.17242	1.89493	1.78232	1.7628	1.89571	2.03797	1.97003	2.12625	1.90283	1.82127	2.19906	1.77439	1.82155	1.85714	1.56516	2.10366	1.87054	2.0082	1.95099	1.49596	1.9438	2.09329	2.04726	1.79895	2.13129	1.69358	2.01127	1.98373	2.05289	1.91728	1.89011	2.12171	1.91437	1.78315	1.96599	2.0105	2.10563	2.2334	1.83289	2.07988	1.91419	2.05557
LINC00632	1.83917	1.99149	1.9889	1.78477	1.99177	1.7163	2.02524	1.98609	2.02256	1.62365	1.72379	1.85272	2.10971	1.93986	1.9635	2.02933	1.73571	1.84592	1.93949	2.39043	2.02075	1.63577	2.12641	1.8625	1.96592	1.76556	2.4447	2.68826	2.11674	1.89168	1.88438	2.08069	1.87351	1.97401	2.02744	2.03419	1.95689	1.89634	1.94265	1.82823	1.7796	2.14447	2.02941	2.34687	1.98661	1.83289	2.19825	1.98694	1.76411
DIP2A-IT1	1.78814	1.98118	1.89139	1.98578	1.87955	1.73021	2.50367	1.92233	2.07781	1.78195	1.73992	1.9645	2.04616	1.9192	1.93658	2.06731	1.65276	1.80224	2.06593	1.82155	1.83338	1.89161	1.96223	1.94365	2.08425	1.80429	1.86037	1.91766	1.8515	2.01743	1.88471	2.10166	1.71439	1.99923	2.18393	2.04276	2.0167	2.02411	1.88805	1.90563	1.72432	1.98607	2.17868	2.10262	1.96555	2.15029	1.94637	2.05675	1.83235
ZMYM4-AS1	1.7846	1.94382	1.8877	1.89809	1.87955	1.77114	2.02524	1.91975	1.83348	1.66303	1.68322	1.89875	1.97382	2.0495	2.023	2.00726	1.71049	1.80224	1.70324	1.90093	1.9179	2.54923	2.03175	1.88354	2.24035	1.80068	1.67735	2.05042	1.93573	1.89649	1.87908	2.09678	1.71223	2.02421	2.01315	1.97844	1.95302	1.93865	2.00477	1.80329	1.82616	1.90515	2.09135	2.09929	2.03147	1.83289	1.98762	1.91419	1.72895
LINC01356	1.78495	2.04669	1.83568	1.80951	1.93001	1.72729	3.5861	1.89275	1.85416	1.81047	1.68322	1.89917	2.11475	1.96427	1.93658	2.0206	2.58615	2.35192	1.70324	1.82155	1.72905	1.5673	2.02366	1.84286	1.96085	1.78841	1.55554	1.93506	1.8515	1.91115	1.91834	2.03653	1.73482	1.98368	2.04406	1.92377	1.93903	1.89996	1.90327	1.77934	1.75065	1.91484	2.07199	2.6514	1.98081	2.70757	2.2407	3.23593	1.7539
CD81-AS1	1.7939	1.99541	1.94203	1.8151	1.99612	1.7355	2.04479	2.15164	2.08178	1.68189	1.76132	1.90121	2.05392	2.04853	2.01399	1.9504	1.6615	1.96565	1.70324	2.00386	1.87189	1.65012	2.04463	1.89373	2.00686	1.8394	1.67178	1.95847	2.04454	1.94053	2.02546	2.05892	1.7786	2.05006	1.9258	2.19158	1.99704	2.05177	2.02599	1.85421	1.95596	2.02969	2.07109	2.2257	2.10822	1.87452	1.92468	1.95519	1.79676
HLX-AS1	1.77553	2.00024	1.91956	1.81195	1.99915	1.71866	2.02524	1.88355	1.96247	1.65267	1.99793	1.83876	2.02914	1.99148	2.00742	1.90283	1.65276	1.8357	1.70324	1.94883	1.72905	1.55859	2.01915	1.8289	1.93675	1.79142	1.49596	1.91766	1.98642	1.88595	1.79895	2.05623	1.8013	2.1402	1.99068	2.20417	2.19856	1.89236	2.27668	1.83314	1.88686	2.01624	2.10877	2.09076	2.01283	1.83289	2.00704	2.02383	1.78228
EGFR-AS1	1.8464	1.9724	1.92797	1.88968	1.93678	1.75521	2.02524	1.91908	1.88663	1.68469	1.69202	1.84875	1.97947	1.96314	2.01226	1.96354	1.68609	1.87508	1.84538	1.848	1.74546	1.77074	2.03049	1.87374	2.14929	1.76668	1.54262	2.3388	2.03761	1.86722	1.83883	2.04492	1.89499	1.99229	1.991	1.93149	1.91423	2.19591	1.95602	2.01325	2.06823	2.02802	2.1467	2.10596	1.99077	1.83289	1.95698	1.91419	1.78769
ASH1L-IT1	1.88269	1.94382	1.83568	1.97714	1.93086	1.85965	2.15474	1.92062	2.06774	1.74778	1.73744	1.86981	2.04301	1.9192	1.99616	1.90283	1.65276	1.8849	1.75166	1.82155	1.72905	2.56672	1.99826	1.88486	2.2864	1.8019	1.95799	1.91766	1.8515	1.83845	1.79895	2.02764	1.74323	1.96979	1.93141	1.92475	1.95441	2.01716	1.88805	1.89921	1.72432	1.90607	2.05248	2.1468	1.99933	1.83289	1.89715	1.91419	1.76269
GTF3C2-AS1	2.04264	1.99277	1.99139	1.94975	1.97016	1.87089	2.21715	1.90918	2.13765	1.66628	1.77889	1.9227	2.10437	2.04209	2.09884	2.11556	1.66104	1.9576	1.7565	1.94296	1.77113	1.99296	2.05467	2.17634	2.41376	1.80709	1.64482	2.07548	1.91143	1.96633	1.88908	2.18377	1.77374	2.03482	1.97133	1.96946	1.9762	2.2621	1.93861	1.93178	1.91902	1.99704	2.23298	2.19305	2.05365	2.03783	2.05309	2.05495	1.80228
FAM85B	1.79237	2.04262	2.34722	1.77844	1.96558	1.78492	2.02524	2.02508	1.88066	1.70374	1.83157	2.00616	2.19628	2.18327	1.98729	1.96427	1.7517	2.08537	1.7579	2.1196	1.72905	1.60804	2.13695	1.98186	2.12038	1.74986	1.49596	1.91766	1.8515	1.87237	1.84593	2.04802	1.78438	2.10764	1.98546	1.86612	1.9289	1.92857	1.99004	1.78303	1.78421	1.99527	2.08104	2.18412	2.12202	2.01302	1.97612	2.03081	1.78575
LINC00327	1.80431	1.98778	2.03686	2.09702	2.0356	1.93165	2.07994	1.92418	1.90162	1.70473	1.78559	1.88118	2.13898	1.95703	1.97365	1.91042	1.65689	1.85944	1.80116	1.953	1.805	1.63743	2.02586	2.01237	2.31109	1.7715	1.86012	1.93707	2.00186	1.87948	1.89957	2.08137	1.8706	2.01959	2.03366	1.97669	2.20792	1.9374	2.1878	1.86181	1.93761	1.9766	2.09008	2.05917	1.96245	2.2561	2.08166	1.99067	1.83282
UFL1-AS1	1.77663	1.97308	1.83568	1.77844	1.87955	1.71967	2.02524	1.91393	1.90118	1.70029	1.77083	1.83876	1.97382	1.9192	2.00931	1.90283	1.67722	1.8366	1.78159	1.95216	1.72905	1.93815	2.18305	1.91929	1.97662	1.8743	1.61254	2.02967	1.92238	1.93441	1.86636	2.057	1.70737	1.96979	1.92343	1.86612	1.94375	1.95824	1.98644	1.7955	1.76785	1.93028	2.04491	2.13005	2.04314	1.83289	1.93573	1.97155	1.72895
FAM106A	1.75505	1.95795	1.83568	1.79508	1.89993	1.70908	2.05161	1.93428	1.91442	1.61185	1.71541	1.85104	1.98076	2.24529	1.93658	2.04784	1.68209	1.80224	1.71288	1.82155	1.72905	1.67787	1.99762	1.8289	2.21023	1.80098	1.49596	2.06389	1.8515	1.85032	1.86379	2.02764	1.7597	2.01916	1.89593	2.10396	1.91863	1.87588	2.15526	1.94115	2.00339	1.91292	2.04358	2.07152	2.00494	1.92505	1.91582	2.08626	1.76209
LINC00940	1.75446	1.96435	1.83568	1.77844	1.87955	1.75198	2.02524	1.89069	2.00114	1.61168	1.74507	1.83876	1.98727	1.92805	1.94236	1.90283	1.65276	1.80224	1.70324	1.86859	1.72905	1.57209	1.96223	1.88228	1.93675	1.74986	1.49596	1.91766	1.8515	1.84997	1.84644	2.2215	1.71153	2.03337	1.98651	2.20062	2.00623	2.22245	2.05597	1.77384	1.81421	2.01712	2.0105	2.05251	1.92753	1.8421	1.94204	1.91419	1.84759
LINC01446	1.74146	1.94382	2.27711	1.77844	1.88626	1.70559	2.73367	1.88837	1.83348	1.60601	1.68322	1.84279	2.40739	1.9192	1.94048	1.90283	1.65276	3.00182	2.85103	1.86393	1.72905	1.56087	1.96223	1.8289	2.45478	1.75666	1.49596	1.92679	1.8515	2.14645	1.88328	2.05078	1.68206	1.96979	1.88713	1.86612	1.895	1.85962	1.88805	2.35398	1.72432	1.86712	2.02684	2.05251	1.92753	2.33327	2.18603	2.71332	1.75073
DNAJC27-AS1	1.86459	2.03813	2.18208	1.89518	2.12984	2.18693	2.07797	2.00073	1.99844	1.73473	1.81298	1.96036	2.16064	2.06649	2.13245	2.06884	1.90052	2.21324	2.09113	2.30196	1.84323	1.91441	2.10005	2.0272	2.09269	2.29592	1.74415	2.1128	1.89999	2.13722	1.97513	2.11145	1.83246	2.13559	2.01988	2.04858	2.06277	2.19384	2.11171	1.93568	1.98974	2.05747	2.12411	2.47188	2.53336	2.27025	2.28108	2.32604	1.97927
PCOLCE-AS1	2.0081	2.00823	1.85354	2.09407	1.9798	1.86553	2.84895	1.91432	1.98022	1.86709	1.78051	1.91468	2.0257	2.01614	2.07115	1.91199	1.69705	2.06554	1.75923	1.91537	2.05687	1.71655	2.06709	2.00648	2.15665	1.87584	1.60641	1.99797	1.93721	1.96352	2.14531	2.098	1.85266	2.00236	2.00164	1.93388	2.00147	2.52213	2.02567	1.91347	1.97062	2.09081	2.05906	2.66204	2.10512	1.93362	1.95917	1.9377	1.83256
TXNDC12-AS1	1.7348	1.98466	1.89656	1.91792	1.87955	1.78619	2.36896	1.88355	2.09892	1.82713	1.68322	1.87428	2.09075	1.9716	1.93658	2.08194	1.65276	1.85017	1.70324	1.9143	1.99835	2.40133	2.00344	1.8289	1.99233	1.80933	2.16479	1.99705	1.8515	1.90635	1.89257	2.14725	1.71742	1.96979	1.88713	2.05841	1.96287	1.90653	1.88805	1.75464	1.78496	2.07726	2.27715	2.05251	1.92753	2.03944	2.05285	2.20978	1.76754
EHD4-AS1	1.87824	2.08386	1.83568	1.80299	1.99612	1.7618	2.06407	1.92655	2.01819	1.60601	1.71497	1.87478	2.09235	1.94601	2.02234	2.19379	1.77055	1.92082	1.70324	1.82155	1.75877	1.99248	2.08413	1.9858	2.09963	1.81016	1.55237	2.1817	1.90224	1.97302	1.79895	2.0692	1.7001	2.08096	1.91302	1.90048	1.96382	2.01967	2.18171	1.8404	1.90145	2.0194	2.08291	2.08054	1.96968	1.88813	2.05495	1.91419	1.74865
TNK2-AS1	2.007	1.98195	1.93647	1.89222	2.03799	1.9235	2.09588	1.9992	2.09768	1.66833	2.00944	1.94227	2.06907	2.03396	2.00637	2.01679	1.67833	1.91585	1.75493	1.85686	1.72905	1.65004	2.03076	1.96828	2.24064	1.90031	1.70264	1.97731	1.94348	1.9745	1.88646	2.13232	1.83403	2.02344	2.05054	2.01198	1.99515	2.12681	2.01537	1.97523	1.92866	2.05666	2.34974	2.16274	1.97398	1.92321	1.967	2.11389	2.1445
PTPRD-AS1	1.83389	2.01973	1.86463	1.89597	1.96162	1.748	2.09647	1.89698	1.97826	1.79627	1.83385	1.88862	1.9865	1.95228	2.04191	1.90283	1.69548	2.07315	1.80566	1.86592	2.02209	1.78015	2.06345	2.05601	1.93675	1.79669	1.53975	1.95555	2.26505	1.84931	1.90137	2.18201	1.8413	2.03953	2.05474	1.89801	1.97963	1.86708	2.02661	1.92613	2.28783	2.10222	2.02572	2.0871	2.01725	1.8502	1.98061	1.93968	1.78311
MGAT3-AS1	1.7348	2.09792	1.83568	1.92414	1.92579	1.72345	2.53361	1.88355	1.83348	1.65864	2.31657	1.83876	2.26183	1.9605	1.99029	1.9519	1.67965	1.80224	1.70324	1.82155	1.72905	1.59024	1.99468	1.87933	1.98057	1.74986	1.58239	1.91766	1.92931	1.83845	2.5511	2.02764	1.764	1.99512	1.88713	1.91897	1.895	1.89658	1.99596	1.75464	1.94902	1.93647	2.0105	2.05251	1.92753	1.83289	1.89715	1.91419	1.81826
ZNF630-AS1	1.79222	1.94382	1.95324	1.95897	1.93733	1.73396	2.17057	1.92532	1.92611	1.60601	1.74426	1.87374	1.97382	1.9192	1.9705	2.02291	1.65276	1.89519	1.70324	1.82155	1.84122	1.69615	1.96223	1.89189	2.36775	1.80845	1.60358	1.91766	1.8515	1.83845	2.13708	2.02764	1.71689	2.0015	1.88713	1.99522	1.895	2.15576	1.88805	1.91678	1.84143	2.03517	2.10358	2.05251	1.96848	1.83289	1.89715	1.91419	1.72895
LINC01121	1.75159	1.97485	2.43795	1.92756	1.89645	2.15507	2.02524	1.91577	1.89645	1.60924	1.70699	1.84894	2.0776	1.95413	1.94644	1.95018	1.68831	1.9132	1.71388	1.88366	1.72905	1.6233	1.99354	1.92465	1.96858	1.80621	1.60949	1.93303	1.88013	1.83845	1.97133	2.04718	1.75151	1.97594	1.92563	1.91085	1.92107	2.10016	1.92801	1.85034	1.75907	1.87991	2.03796	2.07869	2.36494	1.88957	1.98762	1.96753	1.76189
LINC01098	1.75712	1.97482	1.90455	1.77844	1.92412	1.6814	2.02524	1.94721	1.83348	1.60601	1.73032	1.83876	1.98909	1.9192	1.93658	1.92667	1.72914	1.82055	1.70324	1.82155	1.72905	1.59662	1.97795	1.85341	1.99964	1.74986	1.53823	1.91766	1.8515	2.36191	1.79895	2.10417	2.31766	1.96979	1.88713	1.89182	1.895	1.85962	1.88805	1.77644	1.72432	1.95022	2.0105	2.09412	1.92753	1.87428	1.95802	1.91419	1.72895
OXCT1-AS1	1.77916	2.03501	1.88202	1.90237	1.93513	1.89169	2.08286	2.22962	2.0066	1.63797	1.78725	1.84555	2.09186	2.13467	1.98842	2.18606	1.68512	2.07856	1.77615	1.94325	1.7623	1.6238	2.00127	1.90132	1.93675	2.15773	1.71478	1.94824	1.94482	1.87741	1.81715	2.05107	1.72874	2.02423	1.9161	1.89185	1.93394	1.87757	2.06579	1.9783	1.83707	2.02902	2.11735	2.07349	1.95912	1.83289	1.91776	2.81034	1.86995
IDI2-AS1	1.95417	2.01804	1.85461	2.05031	1.95111	1.76235	2.09489	1.89667	2.00186	1.61643	1.68322	1.88217	2.09316	2.08871	2.00946	2.05081	1.77459	2.07373	1.73741	1.85061	1.78248	1.68684	2.07314	1.92573	2.05345	1.76835	1.76478	1.96683	1.8515	1.94123	1.88523	2.06536	1.71459	2.07555	2.03697	1.96752	1.95751	1.9988	1.88805	1.90652	2.01549	1.88092	2.1392	2.18325	1.99074	2.20561	2.02561	1.96359	1.77611
FNDC1-IT1	2.02012	2.00528	1.83568	2.10774	2.09016	1.79994	2.02524	1.88355	2.03896	1.60601	1.73041	1.86575	2.09191	1.99789	2.0137	1.90283	1.70422	2.29754	1.70324	1.89237	1.81611	1.82599	1.96223	1.8289	1.93675	1.74986	1.49596	2.14599	2.36535	1.83845	1.79895	2.28646	1.78667	2.08815	2.10423	1.91716	1.895	1.85962	1.88805	1.79799	1.72432	1.901	2.04702	2.0942	2.05001	1.83289	1.93809	1.91419	1.72895
SLC6A1-AS1	1.7348	1.94382	1.83568	1.8733	1.91908	1.78663	2.02524	1.88355	2.17886	1.60601	1.68322	1.83876	2.02719	1.9192	1.95972	1.90283	1.69832	1.80224	1.70324	1.82155	1.76816	1.57955	1.98995	1.87202	1.93675	1.74986	1.49596	2.02301	1.8515	1.83845	1.8623	2.08226	1.72921	1.99142	1.98709	2.07912	1.98518	1.9221	1.98057	1.75464	1.88133	2.03829	2.10535	2.05251	1.95549	1.83289	1.89715	1.91419	1.7549
SIDT1-AS1	1.7348	1.94382	1.83568	2.00583	1.97685	1.72639	2.02524	1.88355	1.91293	1.68965	1.73549	1.83876	1.97382	2.04789	1.93658	1.90283	1.65276	2.09769	1.70324	1.82155	1.778	2.03515	1.99696	1.88285	1.93675	1.80003	1.67515	2.04878	1.8515	1.83845	1.87807	2.16109	1.68206	1.96979	2.26602	1.97705	1.95228	2.18168	2.00332	1.80267	1.9189	1.90467	2.20238	2.05251	1.92753	1.87884	1.94251	1.98155	1.82439
PCCA-AS1	1.78895	1.94382	1.89224	1.94908	1.93403	1.6814	2.1294	1.88355	1.83348	1.62176	1.76872	1.85534	2.02924	1.9916	2.03044	1.93202	1.65276	1.88995	1.72918	1.82155	1.78296	2.13074	2.00049	2.00023	2.46005	1.74986	1.54764	2.06166	1.8515	1.87034	1.79895	2.0468	1.80912	2.04338	1.88713	1.9585	1.92688	2.04608	1.98407	1.80754	1.86125	1.88795	2.05508	2.07817	1.94696	1.97966	1.9954	1.95173	1.78237
RNF216-IT1	1.7348	1.9911	1.83568	2.03701	1.94737	1.85915	2.1126	1.93263	2.13726	1.826	1.68322	1.83876	1.97382	1.97982	1.97645	1.90283	1.76834	1.80224	1.70324	1.82155	1.8603	1.92197	1.96223	1.8289	2.12162	1.74986	1.62192	1.91766	1.96505	1.83845	1.79895	2.02764	1.76282	1.96979	2.05619	1.86612	1.97346	2.11268	1.96855	1.8205	1.79445	2.06315	2.22092	2.11586	1.97565	1.89591	2.01903	1.91419	1.77363
NUCB1-AS1	2.0689	1.94382	1.83568	1.98355	1.98378	1.86545	2.09368	1.88355	2.07521	1.66638	1.68322	1.83876	1.97382	2.05696	1.96771	2.0133	1.71388	1.80224	1.70324	2.19986	1.83222	1.87204	2.20488	1.94238	2.37471	1.74986	1.68755	1.91766	1.8515	1.83845	1.88375	2.13607	1.89225	1.96979	1.97731	1.92674	1.895	2.02232	1.88805	1.90397	1.88304	2.05816	2.36097	2.10206	1.92753	1.92983	1.89715	1.91419	1.72895
RFPL1S	1.77503	1.97196	1.85493	1.79959	1.9164	1.71158	2.34126	1.89157	1.89861	1.66032	1.73364	2.09296	2.16555	1.9192	1.9474	1.93807	1.70567	2.14186	1.76858	1.83345	1.73641	1.64499	1.97778	1.86115	1.95779	1.83083	1.51353	1.9278	1.8829	1.87695	1.95323	2.66966	1.7411	1.99793	1.93142	1.93702	1.91223	1.90354	1.94476	1.81145	1.73969	2.22502	2.03763	2.44608	1.93801	1.8839	2.18155	1.97428	1.75553
LNX1-AS2	1.88411	2.08298	1.91565	1.7998	1.9057	1.79647	2.05905	2.4035	1.83348	1.84152	1.71086	1.87012	2.27915	2.07512	2.17662	2.22764	1.94181	2.00253	1.7279	1.86317	1.72905	1.62178	1.96223	1.8289	2.10179	2.08297	1.54512	2.11883	1.8957	1.95612	1.84097	2.1336	1.74383	2.1196	1.90966	1.95406	1.98409	2.19561	1.91916	1.80496	1.82959	1.90646	2.0529	2.30059	1.92753	1.88103	2.33188	2.052	1.82886
ABCC5-AS1	1.87638	1.94382	1.83568	1.89564	1.87955	1.76929	2.02524	2.17492	1.83348	1.60601	1.92554	1.86843	2.07195	1.9192	2.02121	1.90283	1.6813	1.8813	1.70324	1.89928	1.72905	2.0756	2.0303	1.8289	1.93675	1.79961	1.49596	1.91766	1.93399	1.83845	1.79895	2.06189	1.68206	1.96979	1.97059	1.86612	2.00646	2.04583	1.94634	1.80227	1.72432	2.01061	2.16473	2.09831	2.09342	1.92261	2.02809	1.91419	1.76119
ZBTB20-AS4	1.76885	1.96762	2.00539	1.83391	1.87955	1.74303	2.02524	2.09207	1.94185	1.62565	1.71943	1.87983	1.97382	1.94978	1.95662	1.90283	1.67265	1.91097	1.70324	1.92847	1.76295	2.26888	1.98624	1.8289	1.93675	1.74986	1.52845	1.91766	1.90931	1.83845	1.85392	2.02764	1.89382	2.00702	1.94562	2.01683	1.97334	1.94019	2.1169	1.85219	1.75976	1.9186	2.09292	2.14639	2.02208	1.8647	1.95928	1.96093	1.75143
PGM5-AS1	1.7728	1.94382	1.87538	2.01139	2.22273	1.71616	2.12239	1.88355	1.83348	1.60601	1.68322	1.83876	2.38299	1.9192	2.14619	1.90283	1.65276	1.95196	1.70324	1.82155	1.72905	1.57172	2.01536	1.95057	1.93675	1.78864	1.49596	1.91766	1.8515	1.83845	1.86024	2.08048	1.97469	2.03167	1.98388	2.5019	1.98228	1.89016	1.9776	2.05861	2.36199	2.08423	2.0105	2.05251	1.92753	1.86839	2.03251	2.01664	1.77872
ALKBH3-AS1	1.87701	1.98487	1.88684	2.03271	2.03166	1.85288	2.07634	2.0405	1.95812	1.68934	1.80517	1.88616	2.05321	2.06369	2.05962	2.05433	1.69274	1.94959	1.70324	1.86891	1.85257	1.84484	2.12121	1.99426	2.01076	1.94906	1.57004	2.04829	1.93436	1.93965	1.84676	2.10888	1.89881	2.00214	2.00319	2.00821	2.00696	2.237	2.03564	1.89366	1.87212	2.07826	2.12067	2.10755	2.03636	1.949	1.95121	1.95483	1.86635
FAM66A	1.7348	2.03375	1.96863	1.79398	2.00773	1.6814	2.04986	1.89725	1.95274	1.60601	1.74274	1.88406	2.02487	1.93618	1.9805	1.92303	1.65276	1.99195	1.70324	1.99466	1.72905	1.787	2.05295	1.94924	2.10754	1.7882	1.51399	1.94354	1.94607	1.86052	1.82957	2.07989	1.88475	2.01086	1.88713	1.90934	2.10181	2.03198	1.88805	1.84469	1.92733	1.88152	2.0414	2.15588	1.94096	1.83289	1.91458	1.91419	1.72895
WWTR1-AS1	1.80456	1.98674	2.0681	1.89124	1.93251	1.97576	2.0598	2.07685	1.91848	1.70029	1.76635	1.87081	2.21477	2.10684	2.02786	2.04805	1.79601	2.15166	1.72009	1.85005	1.75549	1.68055	2.04163	2.03871	2.08236	2.02322	1.93985	2.17522	1.94047	2.03353	1.89723	2.15315	1.76054	2.08263	2.03418	1.95596	1.98602	2.0411	2.13384	1.83934	1.87439	1.99701	2.18955	2.23353	2.27492	2.12618	2.25926	2.0771	2.01574
LINC01293	2.04737	2.04271	1.83568	1.79344	2.00346	1.69809	2.02524	1.99846	1.89227	1.60601	1.81396	1.84982	2.20505	2.01484	1.96851	1.90283	1.70518	1.83204	1.70324	2.13898	1.7829	1.60649	2.00045	1.90748	1.93675	1.76849	1.67684	2.5584	2.00075	1.90147	1.82852	2.06565	1.7363	1.98976	1.99444	1.86612	1.9373	1.97287	1.90992	1.89144	1.88696	1.96176	2.14017	2.11987	1.96608	2.73407	1.99529	1.96398	1.89965
NALCN-AS1	1.77509	2.51452	1.86945	1.78513	1.94388	1.83025	2.02524	1.97517	1.8859	1.60601	2.04308	1.83876	2.02317	1.94103	1.94612	1.94585	1.65276	1.85484	1.70324	1.87326	1.73716	1.57832	1.98502	1.84675	2.03457	1.75818	1.60113	1.99409	1.87921	1.83845	1.90152	2.02764	1.72565	1.97425	1.90821	1.95737	1.96943	1.88559	1.90752	1.75464	1.82298	1.88565	2.27897	2.05251	1.92753	1.8405	1.91956	1.92541	1.77652
FGF12-AS2	1.85034	1.99862	1.877	1.77844	1.87955	1.75288	2.07664	1.88355	1.89752	1.60601	1.68322	1.83876	2.37711	1.95473	1.93658	1.90283	1.65276	2.07125	1.94758	1.82155	1.72905	1.58581	1.96223	1.87231	2.24513	1.74986	1.5337	1.91766	1.8515	1.88458	1.98239	2.02764	1.68206	2.01303	1.92145	1.95572	1.98578	1.85962	1.88805	1.79327	1.72432	1.8973	2.13646	2.05251	1.92753	1.83289	2.6554	2.21277	1.75508
F11-AS1	1.74345	1.96777	1.89776	1.80662	1.98059	1.78085	2.02524	1.88355	2.17255	1.61098	1.81535	1.83876	2.09301	1.95757	1.95173	1.91207	1.65779	1.83038	1.70324	2.38147	1.73765	1.57042	1.98039	2.18947	1.93675	1.74986	1.5042	1.91766	1.86626	1.95519	1.93344	2.05762	1.70791	2.14388	1.97454	1.96273	1.94477	2.59068	2.55804	1.75464	2.03203	2.05827	2.03867	2.24989	1.92753	1.87279	2.38113	2.33605	1.72895
LINC00923	1.8362	1.94382	1.83568	1.7907	2.11153	1.99265	2.16808	1.94032	1.8974	1.61174	1.776	1.84178	2.13518	2.13164	1.94825	2.02084	1.67869	1.81041	1.90238	1.82155	1.72905	1.57163	1.96924	1.83439	1.95098	1.74986	1.49596	1.92451	1.93469	1.85009	1.81513	2.02764	1.69405	1.97252	1.9713	1.993	1.92393	1.87557	1.9526	1.77405	1.82005	2.04919	2.01868	2.05251	1.93107	2.11603	1.90634	1.92107	1.95109
LINC00271	1.84593	1.97731	1.92203	1.8275	2.08982	1.92609	2.10998	2.33017	1.93877	1.70055	1.77715	1.85339	2.10087	1.95689	2.0129	1.91577	1.74516	2.02352	1.86149	2.22844	1.79414	1.67997	2.08897	1.96281	1.95402	2.01036	1.56944	1.95065	1.8515	1.87355	1.94012	2.14589	1.74296	2.00918	2.01797	2.1046	2.04339	2.13801	2.05977	1.84663	1.81034	2.15162	2.0882	2.08076	1.97836	1.91023	2.03591	1.97974	1.93016
LMCD1-AS1	1.78087	2.0455	2.23443	1.89207	1.97421	1.82235	2.02993	1.9866	1.93564	1.65078	1.7359	2.07331	2.03164	1.98858	2.08674	2.01034	1.67972	2.07563	1.82754	2.26711	1.84607	1.64162	2.07887	1.90971	2.38946	1.83549	1.51642	2.01787	1.91777	1.93216	2.05577	2.14366	1.86692	2.16664	1.93921	2.165	2.01987	2.15842	1.96788	1.87921	1.86021	1.95737	2.0252	2.18791	1.98509	1.96451	2.12106	2.29589	1.77096
TCERG1L-AS1	1.7348	1.94382	2.02827	1.77844	1.87955	1.6814	2.02524	2.28542	1.83348	1.60601	1.68322	1.83876	2.07135	2.27056	1.93658	2.05274	1.65276	1.84206	1.70324	1.82155	1.82397	1.55859	2.12575	1.8289	1.93675	1.74986	1.67264	1.98374	2.01105	1.83845	1.87693	2.02764	1.68206	1.96979	1.97007	1.86612	1.895	2.26946	2.00168	1.75464	1.72432	1.90412	2.1638	2.05251	3.08784	1.83289	1.98521	1.91419	1.99455
LINC00639	1.83194	1.96696	1.86538	1.79406	2.03462	1.80293	2.08037	1.90758	1.94619	1.63052	1.92203	1.9038	2.14604	1.92776	1.96983	1.94318	1.6721	1.86741	1.73022	1.91119	1.74327	1.62705	2.05661	1.93532	1.98163	1.8306	1.50958	1.92421	1.8839	1.90406	1.80671	2.15863	1.80352	2.08309	2.0589	2.03265	1.9975	1.93801	2.09618	1.81862	1.8575	2.11407	2.05687	2.10974	1.99708	1.85945	2.05566	2.57904	1.80555
AGBL5-AS1	1.7348	1.94382	1.95046	1.82459	1.99019	1.73269	2.16717	1.88355	1.83348	1.73157	1.855	1.93883	2.01231	2.01825	1.93658	2.02007	1.68559	1.93629	1.85732	1.82155	1.72905	1.57803	2.04039	1.94933	1.93675	1.86204	1.54945	1.91766	1.8515	1.90374	1.79895	2.02764	1.71604	2.03102	1.88713	1.86612	1.96026	2.0722	1.88805	1.75464	1.72432	1.99195	2.0105	2.05251	2.37653	1.9358	1.89715	2.13307	1.76604
TTLL10-AS1	1.97113	1.94382	2.04663	1.86241	1.90582	1.82991	2.0338	1.8883	1.87586	1.62478	1.77813	1.8546	2.34785	1.93682	1.95193	1.91684	1.69797	1.89117	1.73414	1.8426	1.72905	1.56432	2.0256	1.93356	1.94924	1.78308	1.50846	1.97088	1.8515	1.86136	1.80962	2.09945	1.68996	1.97339	1.88713	1.96865	2.18028	1.90124	2.03797	1.7738	1.91661	2.04589	2.08936	2.05251	1.97348	1.84513	1.9032	1.91419	1.78417
LURAP1L-AS1	1.81958	2.00339	1.89529	1.77844	1.87955	1.75906	2.02524	1.96541	1.83348	1.63904	1.68322	1.83876	1.97382	1.94508	1.98685	2.05054	1.85747	1.93869	1.70324	1.82155	1.78587	2.07436	1.96223	1.86054	2.14311	1.77927	1.62848	1.99541	1.90049	1.83845	1.79895	2.04784	1.75048	1.96979	1.88713	1.93171	1.895	1.88277	1.95625	1.99012	1.7837	1.95307	2.29175	2.07957	2.04633	2.03534	1.97544	1.91419	1.72895
DLX6-AS1	2.01823	1.98982	1.85455	2.18219	1.97614	2.02331	2.333	1.88355	1.88947	1.60842	1.6862	1.83876	2.27738	2.05212	1.94311	1.91029	1.65276	2.52302	1.70324	1.86153	1.73044	1.56298	1.96223	1.83197	2.33672	1.74986	1.88206	1.91766	1.86579	1.83845	1.99429	2.03738	1.83898	1.97132	1.88834	1.87736	1.9495	2.16642	1.89307	1.77498	1.8564	1.87349	2.0105	2.60233	2.04276	2.19866	1.99309	2.06767	1.75447
HLCS-IT1	1.86055	1.97401	1.83568	1.88244	1.92296	1.79672	2.08129	1.91489	2.0945	1.74946	1.68322	1.83876	2.03241	1.95797	1.96201	1.90283	1.77474	1.9391	1.70324	1.82155	1.77201	1.93729	1.96223	2.00963	2.20274	1.74986	1.57717	2.03311	1.8515	1.93738	1.86847	2.0876	1.73383	2.01695	1.92458	1.91574	1.94528	2.11626	1.88805	2.16179	1.93603	1.99458	2.21148	2.13246	1.98834	2.09394	1.93695	1.91419	1.86622
LINC01050	1.98684	2.08579	1.98737	1.77844	1.93986	1.6814	2.06463	1.88355	1.97612	1.65776	1.74693	1.89321	1.99456	1.9192	1.972	1.99775	1.70515	1.80224	1.70324	1.82155	1.7592	1.69066	2.06594	1.89464	1.93675	1.74986	1.80948	1.91766	2.40933	1.87378	1.79895	2.09042	1.71843	1.96979	2.13051	1.86612	1.93031	2.10699	1.88805	1.94995	1.72432	2.00042	2.03539	2.05251	1.94906	2.06945	2.00574	1.9962	1.88157
SHANK2-AS2	1.7348	1.94382	1.9024	2.23434	1.94383	1.7961	2.02524	2.01879	2.03249	1.60601	1.68322	1.83876	1.97382	2.18598	2.01117	1.90283	1.65276	1.8548	1.70324	1.82155	1.72905	1.84086	2.17527	1.89897	1.99768	1.81505	1.49596	1.91766	1.8515	1.83845	1.79895	2.15849	1.75862	1.96979	1.88713	2.00938	1.895	2.1439	1.88805	1.75464	1.72432	1.91597	2.16298	2.05251	1.97312	1.83289	1.89715	1.91419	1.72895
FGF12-AS3	1.81258	1.94382	1.83568	1.77844	1.87955	1.82052	2.12594	1.88355	1.83348	1.60601	1.68322	1.88628	2.69	2.05591	1.98266	1.90283	1.65276	2.20033	1.70324	1.82155	1.72905	1.55859	2.01733	1.8289	2.14879	1.74986	1.49596	1.91766	1.8515	1.83845	1.92339	2.02764	1.81958	2.05473	1.88713	1.86612	1.895	1.85962	1.88805	1.90283	1.72432	1.86712	2.13605	2.05251	1.92753	1.83289	2.22508	2.45846	1.72895
ABCA9-AS1	1.7348	1.95461	2.05409	1.78481	1.91052	1.69555	2.08489	1.88355	1.83348	1.60601	1.69148	1.84814	1.98966	1.9192	1.94113	1.99929	1.76158	1.8086	1.74685	1.96456	1.74445	1.63743	1.96768	1.8289	2.07109	1.75778	1.49596	1.91766	2.10709	1.84751	1.82403	2.04386	1.68673	2.38497	1.89385	1.97821	1.90405	2.38653	1.88805	1.80685	1.74043	1.8964	2.02321	3.0019	1.92753	1.84013	2.62894	2.12346	1.75932
MPRIP-AS1	1.97704	2.0038	1.85848	1.86594	1.96542	1.75958	2.05364	1.89936	1.90355	1.60601	1.72927	1.85199	2.00352	1.996	2.07172	1.92614	1.66548	1.8896	1.86109	1.82155	1.72905	2.26574	1.96223	1.89962	2.1323	1.77213	1.49596	2.08816	1.8515	1.93774	1.83426	2.07301	1.68206	1.96979	1.88713	1.91593	1.895	2.05695	1.91418	1.75464	1.72432	1.93249	2.09799	2.09319	2.0327	1.85327	1.89715	1.94418	1.79947
LINC00332	1.7348	1.94382	1.83568	1.77844	1.98764	1.6814	2.02524	1.88355	1.83348	1.60601	1.68322	1.83876	2.49527	1.9192	1.95282	1.90283	1.65276	1.82491	1.70324	1.95036	1.72905	1.55859	2.19686	1.8289	1.93675	1.74986	1.52231	1.91766	1.8515	1.87068	1.79895	2.21044	1.69874	2.58237	1.88713	1.86612	2.10675	1.8818	1.88805	1.75464	1.72432	2.31872	2.18286	2.07844	1.92753	1.83289	1.89715	1.91419	1.76517
ADAMTS9-AS1	1.76133	2.00988	1.90734	1.83236	1.94216	1.71166	2.07672	1.898	2.22379	1.6232	1.80278	1.87275	2.08798	1.9371	2.04423	1.91353	1.65858	1.84812	1.72217	1.88998	1.85957	1.76735	1.98556	2.03744	1.94628	1.77693	1.52127	1.98056	1.91866	1.88465	1.81518	2.13793	1.84564	2.00775	2.0462	1.98102	2.0435	1.88093	1.98883	1.77734	2.04487	1.94636	2.06176	2.06813	1.94404	1.90003	2.0041	1.95513	1.76374
PRR34	1.97739	2.07562	1.94373	1.9386	2.1165	1.8317	2.03597	1.91311	2.21096	1.71107	1.87234	1.95382	2.09794	2.01934	2.04375	2.03752	1.84981	2.06161	1.83774	2.03155	1.80119	1.74923	2.15731	1.95064	2.05741	1.90927	1.58007	2.04758	2.17885	2.03653	2.1853	2.20649	1.91973	2.06593	2.31161	2.18882	2.05895	2.0858	2.01138	1.99196	1.97611	2.14085	2.10871	2.22742	2.16948	2.03397	2.3448	2.19281	1.88814
UBXN7-AS1	2.00838	1.98518	1.83568	1.8741	1.87955	1.83777	2.02524	1.88355	2.18151	1.60601	1.68322	1.94408	2.1296	2.12067	1.93658	1.90283	1.68736	1.85079	1.70324	2.00364	1.72905	1.68104	1.96223	1.89364	1.99304	1.97701	1.5523	2.14654	1.8515	1.83845	1.89374	2.18694	1.78693	2.06548	1.98792	1.99874	1.96373	2.16337	1.95858	1.75464	1.90123	2.03969	2.19585	2.3107	1.96963	1.83289	1.89715	1.99496	1.80609
PLCG1-AS1	1.94189	2.00881	1.93216	2.00734	2.00223	1.93408	2.16369	1.92886	2.11574	1.66854	1.7494	1.91371	2.16665	2.08103	2.0443	2.22183	1.71607	2.1585	1.79105	1.8719	1.76038	2.02688	2.11083	1.93016	2.2367	1.90374	1.83268	2.02287	1.93097	1.98003	1.79895	2.13474	1.81896	2.03781	2.01875	2.02238	1.96749	2.29638	1.94419	1.99712	2.11388	2.04878	2.19412	2.06736	1.93876	2.0655	1.94046	2.51532	1.96929
SPANXA2-OT1	1.7756	2.12421	1.85003	1.78972	1.97358	1.85905	2.02524	1.96125	1.83348	1.668	1.69783	2.00402	1.97382	1.95586	1.93658	1.97472	1.6687	1.93188	1.91011	2.04732	1.74272	1.57737	2.0099	1.84398	2.07452	1.77775	1.49596	2.22353	1.87492	1.85448	1.84313	2.03725	1.69857	1.96979	1.88713	2.11388	1.92688	1.91388	2.02979	1.96716	1.73861	1.91865	2.07687	2.24606	1.92753	1.83289	1.92235	1.93308	1.80836
PTPRJ-AS1	1.81007	1.94382	1.83568	1.77844	1.87955	1.6814	2.02524	2.22977	2.16965	1.88716	1.91094	1.88473	1.97382	2.05157	1.93658	1.98313	2.14301	1.8642	1.70324	1.82155	1.80399	3.05729	2.01553	1.8289	1.93675	1.89956	1.49596	1.91766	1.8515	1.83845	1.79895	2.02764	1.77218	1.96979	1.95256	2.03408	1.895	1.97847	1.88805	1.96488	1.80261	1.86712	2.07255	2.05251	1.92753	1.83289	1.89715	1.91419	1.82715
HOXA11-AS	1.75852	1.98757	1.84399	1.78497	1.91129	1.73151	2.13538	1.88355	1.94615	1.61058	1.69168	1.84357	2.72789	1.92634	1.95052	2.85819	1.71622	1.82171	1.71079	1.82155	1.74484	1.56132	1.96223	1.84632	1.94432	1.83672	1.81524	1.91766	2.19052	1.83845	2.36968	2.02764	1.70585	1.96979	1.90087	1.87528	1.895	1.88496	1.89758	1.84516	1.72432	1.86712	3.23851	2.07478	1.93317	1.85505	2.11493	2.16575	1.79555
LINC00336	1.83087	2.01872	1.94669	1.94911	2.25832	2.01328	2.02524	2.0635	1.86909	1.9484	1.72946	1.84542	1.98134	2.03339	2.06045	2.29318	1.75192	1.82022	1.70324	2.00494	1.78297	1.57194	1.96223	1.84098	2.55226	2.03518	1.6458	1.93273	1.87027	1.86402	1.85182	2.02764	1.89189	2.00559	1.89666	1.87879	2.00664	2.34998	2.07414	2.02866	1.73577	2.31774	2.06385	2.21867	1.96614	1.84316	1.95692	1.91419	2.04104
EIF1B-AS1	1.90803	2.09645	2.00442	1.95978	2.0423	1.94518	2.03637	2.18184	1.99845	1.76188	1.84263	1.97919	2.06167	2.11296	2.10449	1.99584	1.77209	2.2249	1.759	2.19595	1.87099	1.77485	2.12695	2.12168	2.04664	2.26597	1.60217	2.0306	1.93686	1.98579	1.89976	2.21533	2.0163	2.1584	2.0182	1.98449	2.0103	2.05508	2.08906	1.92773	1.89243	2.06744	2.14138	2.22996	2.12043	1.95906	2.18896	2.02765	1.94064
LINC00165	1.7348	2.03891	1.83568	1.80142	1.96233	2.12236	2.02524	1.88355	1.83348	1.60601	1.85304	1.83876	3.62303	1.9192	1.96928	1.90283	1.65276	1.84777	1.70324	1.82155	1.72905	1.55859	1.96223	1.85959	1.93675	1.74986	1.49596	1.91766	1.8515	1.83845	2.42265	2.06656	1.68206	1.96979	1.88713	1.96056	2.13729	1.88207	1.88805	1.75464	1.8099	1.86712	2.0105	2.07876	1.92753	1.83289	1.89715	1.91419	1.72895
LINC00574	1.75473	2.03848	1.91724	1.79482	1.8996	1.75294	2.20937	1.89079	1.89758	2.04455	1.70442	1.97743	2.1478	1.9192	2.17947	1.976	1.69301	1.82669	1.83068	1.83762	1.72905	1.66612	2.05772	1.85079	2.06472	1.79026	1.50549	2.06167	1.88545	1.98339	1.81517	2.12916	1.71784	1.97527	1.91297	2.19556	1.90667	1.98289	1.91192	1.91225	1.78568	1.98433	2.03499	2.15254	1.94871	1.84223	1.93366	2.02082	1.81227
GNA14-AS1	1.91523	1.97035	1.91389	2.06376	2.2524	1.99576	2.02524	2.50626	1.95387	2.80755	1.7628	1.83876	1.97382	2.01912	1.93658	1.94334	1.67493	1.89377	1.73925	1.94035	1.83952	1.9843	2.16363	1.9887	2.04264	1.82628	1.90776	1.96947	1.8515	2.00785	1.97525	2.02764	2.10079	1.96979	1.92005	2.1831	1.895	2.08721	1.93344	2.02742	1.98038	1.89607	2.07225	2.05251	2.2875	1.86833	1.93214	1.91419	1.85011
LINC01136	1.76018	1.94382	2.03534	1.77844	1.93845	1.82949	2.04734	1.9558	1.8747	1.73255	1.71022	1.93842	2.29149	1.97183	1.94654	2.16104	1.70153	1.98587	2.66548	2.0022	1.77092	1.71239	2.021	1.87505	2.03116	1.90656	1.60563	1.92932	1.89468	1.88749	1.89297	2.08609	1.70246	2.10353	1.9164	1.89534	1.9148	2.09285	1.89825	1.7876	1.75074	1.94299	2.02444	2.09201	1.96928	2.17835	3.06243	2.08071	2.40972
LINC01482	1.96199	1.94821	1.86829	1.87362	1.90473	1.79765	2.04973	1.9329	1.93301	1.66976	1.71641	1.91671	2.01207	2.09485	2.0907	1.99428	1.69254	1.93549	1.70324	1.86164	1.74156	1.79392	2.12952	2.09993	2.05222	1.8554	1.71856	1.96031	1.91489	2.10688	1.79895	2.10491	1.71954	2.07947	1.94078	1.95086	2.01518	2.01756	1.95461	1.8898	1.88576	1.87668	2.05134	2.307	2.20726	1.90188	1.97633	2.00684	1.76582
LRP4-AS1	1.81876	2.03143	1.99254	1.83639	1.93641	1.77074	2.5014	1.89393	1.83348	1.67858	1.75793	1.87319	2.26658	1.93207	1.97818	2.0903	1.72623	2.06098	1.80864	1.86723	1.75746	1.58353	1.99229	1.84465	2.08036	1.79332	1.58908	2.03167	1.90001	1.93613	1.82219	2.05754	1.74982	2.01635	1.96015	1.89896	1.895	1.94919	1.90523	1.90165	1.78312	1.88887	2.02227	2.34526	1.95786	1.96148	1.98722	2.11768	1.81181
BACH1-IT2	1.85569	1.9687	1.83568	1.94577	2.11331	1.86652	2.22268	1.99632	1.94661	1.96158	1.75794	1.92335	2.10311	2.04302	2.04825	2.08355	1.76357	2.18847	1.93917	1.95978	1.83283	1.91213	2.03626	1.906	2.14421	1.87316	1.74757	1.98998	1.94117	1.94008	1.93845	2.14835	1.74568	2.03721	2.04933	2.00461	1.99658	2.20475	1.95147	1.8565	2.11614	1.98545	2.15124	2.1818	1.94025	2.24033	2.05426	1.93881	1.787
ITGB5-AS1	1.83253	1.94382	1.83568	1.77844	1.87955	1.6814	2.02524	1.88355	2.06208	1.60601	1.68322	1.83876	2.00793	2.00718	1.9659	1.90283	1.65276	1.84308	1.70324	1.82155	1.72905	1.92681	2.06507	1.93596	2.20017	1.74986	1.49596	2.11208	2.22997	1.89637	1.79895	2.02764	1.71217	1.96979	1.88713	1.86612	1.895	1.89959	1.88805	2.06442	1.82595	1.86712	2.0105	2.05251	1.96294	1.92431	1.89715	1.91419	1.72895
FAM225A	2.14083	2.04878	1.94317	2.21054	2.1419	1.89173	2.06934	1.88905	1.99807	1.72966	1.82235	1.99582	2.03746	1.9958	2.0586	2.07905	1.77385	1.88126	1.7565	1.83985	1.84216	1.80628	2.01226	1.91431	1.98321	1.92208	1.6279	1.98412	2.62191	1.95813	1.94056	2.07482	1.91466	2.00687	2.1101	1.93478	1.96457	1.94852	1.95943	2.06794	1.79407	1.97869	2.4239	2.16269	1.98321	1.90575	2.00213	2.14673	2.00014
LINC00323	1.77245	1.96361	1.97795	1.80173	2.02543	1.75776	2.02524	2.3707	1.98136	1.62774	1.92552	1.86164	2.0437	1.93621	1.94771	1.90283	1.65276	1.84838	1.75652	2.02197	1.83869	1.66791	2.01487	1.93006	2.31775	1.80711	1.63458	1.94359	1.93089	1.84955	1.93216	2.07999	1.76567	1.975	2.02114	1.90943	1.90609	1.90477	2.00869	1.83609	1.80164	1.94477	2.02606	2.06143	2.11137	1.86806	1.94042	1.92727	2.06824
LINC00887	1.74596	1.98231	3.00029	1.80124	1.87955	1.78979	2.03253	2.17593	1.85165	1.75548	1.74162	1.89519	2.02637	1.94903	1.94964	2.12944	1.87272	1.89552	1.70324	1.83054	1.80506	1.57404	1.99337	1.84725	2.02972	1.82232	2.76301	1.9998	1.92622	1.84498	1.946	2.10387	1.71866	1.9759	1.9064	1.87256	1.94641	1.8951	1.94082	2.2917	1.74746	2.00125	2.05128	2.4417	1.93149	1.85365	2.23181	1.97467	1.7867
KCNK15-AS1	1.79062	1.97	1.95001	1.77844	2.07557	1.76556	2.02524	1.8972	1.98062	1.61686	1.81803	2.39352	2.33806	1.93612	2.26338	1.90283	1.88638	1.92153	1.73879	2.09868	1.76633	1.75923	2.07749	1.89013	1.93675	1.76909	1.53169	1.94346	1.8515	1.92453	1.85936	2.12998	1.84388	1.96979	1.93561	1.88782	2.10118	1.94809	2.01851	1.8788	1.90944	1.97816	2.02598	2.23615	2.04377	1.86788	2.03061	1.96557	1.79001
CSE1L-AS1	1.7348	2.00094	1.87876	1.87792	1.96136	1.79173	2.02524	2.05457	1.96402	1.74331	1.72706	1.86383	2.161	1.95625	2.09868	1.90283	1.72391	1.93322	1.70324	1.88739	1.81002	1.60096	1.99133	1.91803	2.08794	1.74986	1.49596	1.97394	1.92139	2.14559	1.79895	2.02764	1.75567	1.9925	1.88713	1.86612	1.895	2.13365	1.88805	1.87224	1.72432	1.86712	2.07757	2.05251	2.06869	2.3789	1.89715	2.0776	1.88521
ROR1-AS1	1.79268	2.04102	1.88954	1.83132	2.16064	1.80763	2.06743	1.92565	2.03333	1.61727	1.80375	1.90087	2.03521	1.94256	1.97452	1.90983	1.6904	1.80761	1.7522	1.84253	1.88378	1.84325	2.06459	1.85747	1.9492	1.80248	1.53303	2.00501	1.99061	1.9773	1.83061	2.14221	1.7627	1.98052	2.29966	1.95415	1.93283	1.89085	1.8959	1.85965	1.79108	1.96365	2.03718	2.11282	1.96428	1.84509	2.00208	1.93217	2.12956
LCMT1-AS1	2.00624	2.02472	1.97449	1.90359	1.9764	2.00588	2.05099	2.0339	1.92788	1.75773	1.953	1.97641	2.17638	1.98894	2.04876	2.00549	1.87738	2.57837	1.79472	1.9736	1.74874	1.74414	2.04384	1.87202	1.9556	2.35515	1.56998	2.02301	1.98178	2.01358	1.95239	2.0956	1.74076	2.00212	2.23764	2.15623	1.98518	2.16102	2.0028	1.86682	2.02291	1.99737	2.10535	2.17773	2.02312	2.65902	2.13353	2.18839	2.08663
CADM3-AS1	1.82145	1.94382	1.83568	1.7821	2.0961	1.74915	2.02524	1.89961	2.59269	1.63393	1.99792	1.84146	2.02179	1.95481	1.97275	1.9218	1.6631	1.93499	1.70324	1.83586	1.73791	1.57809	2.03565	1.96016	1.96623	1.78587	1.55029	1.92986	1.8515	1.85918	1.8559	2.10659	1.72443	2.04364	1.94774	2.02671	1.99087	1.92608	1.9864	1.81861	1.93587	2.14438	2.04311	2.05251	1.96194	1.84121	1.93371	1.93254	1.81446
[truncated: 206 more columns]

## Sheet: S3
Table S3 LncRNA-related DEGs
gene symbol	TCGA.MP.A4T4.01A	TCGA.05.4250.01A	TCGA.64.5774.01A	TCGA.97.7937.01A	TCGA.97.A4M6.01A	TCGA.44.A4SU.01A	TCGA.78.7155.01A	TCGA.78.7163.01A	TCGA.55.7574.01A	TCGA.78.7535.01A	TCGA.55.8619.01A	TCGA.95.7567.01A	TCGA.44.7670.01A	TCGA.NJ.A7XG.01A	TCGA.44.8117.01A	TCGA.62.8402.01A	TCGA.49.4507.01A	TCGA.J2.A4AD.01A	TCGA.55.A490.01A	TCGA.67.3770.01A	TCGA.55.A48Y.01A	TCGA.44.3918.01A	TCGA.05.4249.01A	TCGA.67.4679.01B	TCGA.55.A494.01A	TCGA.64.5778.01A	TCGA.49.AARQ.01A	TCGA.95.8494.01A	TCGA.55.7726.01A	TCGA.78.8660.01A	TCGA.49.4490.01A	TCGA.J2.8194.01A	TCGA.44.2659.01A	TCGA.78.7633.01A	TCGA.55.8299.01A	TCGA.67.6217.01A	TCGA.67.3774.01A	TCGA.MP.A4T6.01A	TCGA.50.5942.01A	TCGA.55.A48Z.01A	TCGA.99.AA5R.01A	TCGA.86.8280.01A	TCGA.83.5908.01A	TCGA.78.7146.01A	TCGA.95.7948.01A	TCGA.55.7570.01A	TCGA.50.5072.01A	TCGA.91.8499.01A	TCGA.49.AAQV.01A
PRC1	26.1483	40.0229	30.8552	17.587	10.8894	8.9709	66.5887	6.58427	12.4481	12.2645	8.28399	20.3294	37.6003	6.4154	11.7803	32.4148	23.0322	24.21	15.1168	5.674	15.7676	7.78401	10.1602	8.11175	21.5157	14.9147	12.3999	30.9438	32.9274	31.6559	6.45848	7.99105	5.06	9.09148	28.216	6.77747	10.9989	7.00059	5.73304	19.3607	5.96838	11.91	51.5482	61.5367	9.32032	58.6866	57.3685	42.5559	16.0278
PLK1	17.8938	43.1118	41.6946	12.2708	10.0272	10.306	72.4612	5.08559	10.5869	14.5638	8.24143	13.8683	66.0553	7.43598	9.97563	20.7264	22.4711	20.7226	32.3203	4.73254	13.7493	6.99264	8.73986	5.84503	20.9121	8.60697	7.47754	35.4353	29.7659	44.5837	9.28251	5.40312	7.513	6.34433	16.8622	5.23565	6.88417	8.99382	5.31798	14.626	5.48527	9.2919	44.9783	56.6673	9.24402	56.1642	58.0378	39.6225	12.9457
DTL	9.50942	29.1723	13.4352	8.20091	6.8317	4.85971	37.3007	3.72276	9.9124	7.60116	5.39412	10.9788	21.0578	4.97402	10.271	10.0257	4.79934	14.3803	7.10798	4.08407	11.6874	8.24044	7.7821	6.8544	9.72951	6.66383	10.9497	17.6875	17.5797	16.6827	5.467	5.42276	4.67228	9.93371	10.9377	4.56092	9.68754	8.1813	4.34673	13.0812	4.62841	8.7444	31.6548	20.6516	5.3425	22.2652	28.789	17.8163	13.7378
ECT2	23.295	59.9152	42.6937	24.9138	8.49707	8.65064	102.66	10.4216	18.5181	7.73415	14.1234	80.0387	60.3306	13.3157	23.7169	28.0915	20.7842	21.9919	17.4233	9.2937	39.719	26.96	17.3239	10.965	23.4752	20.9524	10.4865	35.8644	36.222	21.5601	10.4749	11.9571	10.2649	11.9553	29.821	9.86443	16.5542	5.39233	14.0394	15.964	6.40933	12.3117	85.9276	57.3502	7.15295	104.639	103.283	135.552	12.3223
SPDL1	9.10067	11.2567	10.9055	8.18829	6.91503	8.98167	32.112	7.90575	11.0691	4.56153	4.39112	8.58927	14.4825	5.36985	6.98323	8.74076	5.38851	9.96204	6.14427	7.37591	5.83451	8.2392	5.94648	7.19037	5.64702	9.5116	5.90522	13.4326	8.52954	18.9272	6.68051	8.41427	6.18421	8.14819	16.4657	7.04158	5.44686	5.70197	4.72427	9.57911	5.02114	8.5566	17.0555	15.7479	7.46437	18.6194	11.3066	16.7284	8.90608
KIF18A	8.87952	12.7856	9.86309	7.01012	4.31617	3.47244	32.8452	5.06828	4.49364	3.90838	3.68669	7.13923	14.706	4.49288	6.77818	11.7515	7.33882	8.17251	2.98167	4.28435	5.8711	7.16175	4.57065	4.02231	6.05292	5.8964	4.96952	7.55838	9.00914	7.19617	3.5544	4.69123	4.54973	6.10831	7.28069	5.56242	4.95529	4.7992	3.60608	5.19616	3.53995	5.60901	12.1416	18.3009	5.18861	12.6674	10.7722	14.9008	5.58956
PSMD2	123.994	111.514	85.8116	76.933	69.9586	75.1192	319.232	133.401	82.7842	36.9166	74.1548	145.736	353.721	80.0781	102.975	94.7485	80.8503	113.04	107.933	80.7264	103.024	80.1995	116.123	82.3537	75.0602	94.7633	74.7232	171.061	152.387	128.464	95.7026	103.364	86.6062	114.097	91.7524	97.9665	120.615	56.6222	76.751	61.9346	57.9717	96.7447	230.577	230.256	109.964	223.958	223.435	221.398	80.7874
TMEM194B	5.38893	9.3852	7.20014	6.78762	6.64263	5.1342	4.41009	5.96964	6.56411	5.02412	4.19681	6.48959	11.22	6.59859	5.26202	9.58582	5.2257	8.28804	3.69948	6.77074	5.03196	6.63011	6.85046	5.85353	7.81456	5.13855	3.82202	5.70018	10.9321	7.16489	6.18648	7.01513	4.30944	6.51066	6.66798	5.78277	5.35119	7.99421	6.1262	5.65679	5.56183	5.39184	7.56592	10.0876	5.1778	5.71893	10.8864	6.49458	4.86919
EXO1	7.86188	18.4978	14.0335	6.56365	4.59697	3.87341	25.0588	3.02244	4.71708	5.09854	3.30264	7.78843	19.2254	3.99763	7.81471	10.6289	13.0114	10.2775	6.79059	3.33263	7.01858	5.8133	4.49622	4.13373	8.58028	4.86312	7.7382	13.6589	10.6914	10.8783	4.55075	3.99832	3.71279	6.8242	8.56381	3.3982	4.37749	4.87206	3.13359	9.7768	3.4296	5.8786	18.8402	14.6849	5.68178	22.5531	28.1287	22.1139	10.5229
KPNA2	106.076	215.276	183.72	171.188	57.4209	33.4262	415.543	31.9226	53.3941	44.3252	22.6164	195.988	248.376	28.7022	85.0313	155.528	109.017	147.525	99.9549	42.4006	112.111	127.352	59.5591	27.2469	111.64	93.911	33.7478	156.645	137.436	162.195	47.5936	51.383	29.4837	65.1302	102.022	43.7438	41.9181	24.2857	13.8489	92.2594	26.7861	53.8607	184.094	590.032	50.0934	201.64	203.691	198.064	92.5956
NUP50	25.9739	31.5855	21.8275	18.3963	19.4265	12.8053	49.523	9.52927	22.2484	14.3212	14.8087	13.2455	43.8801	16.0388	12.9298	26.3152	14.7221	24.2882	11.8342	11.1404	14.2248	17.7719	23.5964	15.726	25.342	12.9558	19.7166	18.1406	38.5273	18.0836	15.4415	24.0848	14.2191	19.7331	23.1197	18.5915	21.2475	22.9376	19.818	20.3424	14.9267	22.2387	34.0646	27.3612	21.9728	29.7435	30.5534	17.4531	15.0185
LYAR	26.042	45.8566	18.1071	31.2992	23.1145	18.301	54.216	16.6261	20.7313	13.9459	12.9257	31.2696	30.4014	18.2784	15.5192	32.7423	20.63	14.3283	24.458	12.3095	19.1319	18.6785	17.9746	13.5173	22.7316	26.1097	18.1068	37.3395	26.4434	30.7657	27.9288	21.0634	12.0088	14.0654	34.6665	17.5143	13.8662	24.5714	11.3134	14.0092	15.6022	19.6416	67.6196	78.8198	21.9478	90.0495	40.2282	36.2569	26.9393
ANLN	19.498	71.9445	23.5311	25.6678	7.9411	8.79234	80.1603	5.06626	12.1	16.9643	6.60998	20.2364	30.6577	5.04753	29.3076	26.6569	23.1289	33.4088	18.5475	6.42719	14.9168	15.0293	6.27462	6.54128	34.5251	10.9153	17.111	50.1675	126.566	26.6212	11.4465	6.6685	18.9346	8.01644	48.6967	6.58924	5.34098	5.43737	5.21361	24.6636	3.94639	12.5138	120.41	69.5222	7.65698	54.167	93.5154	41.5625	23.4917
TPI1	383.984	667.005	838.929	411.69	265.75	258.679	702.021	480.269	326.872	301.078	230.107	570.118	821.713	539.521	482.098	705.02	746.537	426.02	606.464	447.16	424.927	401.439	323.892	344.96	782.714	281.218	569.149	947.323	753.186	915.129	439.47	535.948	327.362	422.74	531.779	282.446	301.33	390.491	184.254	394.579	201.215	790.709	331.088	1429.98	467.346	692.614	998.733	1521.9	372.257
GAPDH	1313.29	2123.8	2571.24	1547.75	974.028	836.889	1488.02	2043.32	1300.27	1304.96	885.562	2297.05	2233.37	1408.94	1837.42	2888.63	5070.55	2368.48	3086.5	880.679	1219.68	798.834	982.747	588.4	2154.25	1221.88	2598.49	3758.38	2894.73	5131.12	1866.14	2120.57	801.429	970.05	2247.3	709.722	749.999	1239.29	515.804	1890.24	633.061	1477.44	1148.31	6250.19	1194.77	3189.95	3477.4	4743.17	1443.22
ERLIN1	19.9834	58.0351	21.2843	16.0656	19.6098	11.8238	60.053	23.6792	20.3517	11.5356	17.9628	23.8077	35.9497	20.3471	28.0598	29.6342	35.0712	20.4326	22.0634	15.2105	25.5089	14.7793	27.1282	21.7428	19.0808	19.7636	8.17651	30.4967	42.2935	21.5422	19.6771	31.8427	18.7959	33.2013	27.5035	19.2068	28.7354	13.058	25.9358	19.4764	15.4904	19.7851	40.2189	83.1936	31.6239	27.3829	71.8519	19.8362	14.3399
TEAD4	14.0408	18.7984	17.7931	27.8211	10.9281	6.44918	33.4504	4.05355	15.284	16.1258	15.3781	40.6842	31.0267	13.9526	17.1345	31.5483	27.1721	12.1196	16.2167	7.17983	19.5266	9.54939	8.31808	9.75512	29.3025	5.7005	11.8975	17.2712	35.2648	41.5231	11.7538	21.3546	10.5262	17.0495	31.7125	7.74405	8.02258	7.19092	7.08068	12.2629	22.8347	10.3066	13.7041	29.7779	31.1855	34.6244	51.4504	40.9687	7.21788
B3GNT5	18.562	24.1107	19.5292	8.40228	6.265	7.80214	15.148	5.1957	19.0017	5.94338	8.66813	13.0463	28.8034	6.00751	13.2262	9.13427	29.9783	31.5002	3.65713	6.30025	8.74656	24.7266	10.1752	8.97795	6.63504	8.42125	8.8308	28.4356	13.7423	9.39835	6.64824	18.5793	5.52854	6.57719	8.50602	9.02858	14.2428	6.0053	8.42612	8.07715	8.89315	8.28611	56.7526	71.5233	6.56458	22.6203	28.6404	17.4552	5.54402
VANGL1	8.6395	14.1872	12.4468	10.4943	13.843	9.81865	7.71056	7.27242	8.83869	8.05781	9.34259	9.96187	23.3566	7.0676	11.1907	13.1188	9.34258	15.8891	11.2181	4.74235	9.56583	6.76774	14.0727	8.22698	16.7198	6.77885	4.24171	14.795	25.9183	11.0692	10.7839	13.1901	9.53657	12.8222	15.3205	9.57521	8.32382	6.4536	9.17071	9.3197	6.36214	10.5655	24.9874	21.5086	10.5195	21.9933	23.8668	12.2077	9.96194
PGAM1	33.9171	83.1831	44.4287	24.5233	38.866	24.7798	109.949	48.6394	31.1006	9.67718	25.6597	47.6251	31.1542	37.9688	42.5603	54.8698	24.5512	38.3867	36.3628	68.47	33.8062	33.5739	55.332	26.7427	33.7838	33.6131	7.66283	113.983	54.3041	68.8934	33.4177	48.6016	30.2249	29.7275	57.0954	44.7997	49.9401	21.2385	29.1543	36.8105	25.3063	42.0837	55.6485	101.739	35.5166	89.2686	63.1553	37.4791	47.2126
HMGA1	280.104	455.019	226.433	103.621	203.171	139.446	1532.53	193.614	111.355	69.5541	152.618	401.274	1489.45	221.805	387.525	569.644	355.469	222.827	303.089	97.897	247.709	101.92	297.349	118.422	360.031	120.854	48.7038	239.494	280.708	564.746	387.804	249.377	132.234	226.632	174.42	116.209	111.277	168.414	86.7723	100.154	88.2294	211.271	1565.42	941.367	302.315	571.012	518.24	322.528	213.961
PLEKHA8P1	7.76279	5.52834	5.36965	3.03702	7.49028	4.18259	8.93962	6.08428	6.16351	7.48255	5.03727	4.96579	9.33698	5.65844	3.54485	6.57152	4.32864	6.95574	4.76742	3.91912	7.61249	4.53734	4.34288	4.50593	4.55177	4.20013	4.84834	9.51448	7.15899	7.45644	4.91733	8.02735	6.79808	6.38828	7.17473	5.59462	4.8027	5.3783	5.16967	6.17471	7.15735	7.73811	10.6572	9.18098	3.47874	9.35513	14.6959	10.2798	7.3285
MESDC2	21.3669	37.8467	31.3406	17.5153	32.4497	22.5699	39.9934	39.9647	21.4676	14.9333	17.1764	23.3739	25.9783	26.5837	18.6433	50.1859	37.4722	22.1738	22.6177	22.148	29.4056	18.9091	29.6975	18.8362	24.5621	26.3214	10.4293	26.4705	31.4249	31.8667	26.4921	26.033	14.334	50.3569	38.5036	28.705	34.2294	25.6471	24.7096	19.963	19.5121	26.038	42.8477	54.3105	28.7886	54.3441	61.8433	30.8907	19.787
SLC2A1	78.7374	207.963	55.8494	43	57.2751	73.9093	173.266	138.001	54.631	28.8071	60.5569	53.2146	221.876	45.4673	65.0279	64.168	73.9504	69.3739	75.0608	44.426	55.7992	54.107	49.4917	16.7959	65.5872	28.9179	41.0808	319.553	137.107	60.0252	82.6613	29.4529	25.695	10.3109	73.2118	15.7897	48.616	27.244	18.7408	73.8771	25.0662	44.9913	214.959	284.717	61.544	658.032	212.256	207.587	48.2683
AP2M1	226.667	191.197	96.784	103.569	134.256	130.126	162.603	139.763	143.409	91.6449	130.975	159.094	250.496	128.887	128.112	129.011	188.839	169.308	193.083	140.504	127.638	103.167	163.581	121.932	110.618	204.925	153.923	282.25	144.602	163.209	158.674	128.367	129.753	127.157	174.18	123.217	184.379	90.4293	146.587	129.828	125.501	141.064	326.363	315.665	168.291	232.86	266.68	290.359	94.7851
VDAC1	139.245	194.517	199.652	106.306	160.067	88.148	211.922	251.192	113.927	58.745	141.673	137.622	132.214	214.186	104.541	166.129	136.324	93.6982	144.157	93.6698	115.971	114.944	134.087	76.9324	182.063	81.102	53.2292	304.312	170.272	324.073	77.3151	181.185	62.7595	151.527	140.057	120.782	127.656	95.1791	70.0285	136.423	80.1783	124.382	156.167	209.709	165.292	202.141	424.473	156.041	207.605
ERO1L	51.9489	122.871	96.7129	88.8637	88.2824	67.0305	56.0543	82.5771	54.6385	53.2032	60.4707	91.4782	99.8016	39.8338	76.0695	76.4058	71.9251	116.69	112.865	34.0863	45.8125	74.4336	55.5969	28.877	78.7704	29.1703	48.6921	108.663	95.1796	268.434	127.388	46.4144	21.8538	34.9477	145.149	50.4365	44.4378	41.17	34.9169	158.784	25.789	50.6147	199.015	479.849	21.9985	94.8386	428.434	50.5716	81.5449
ANP32B	206.839	198.862	231.511	178.73	156.049	103.612	344.042	282.177	195.4	194.012	131.602	222.785	248.761	205.309	163.166	224.528	283.951	149.119	167.972	103.188	202.302	118.824	176.032	104.683	113.875	209.322	139.593	274.462	412.543	192.734	195.955	201.942	167.896	118.077	206.074	161.199	123.174	109.049	204.988	210.89	154.276	190.567	412.809	458.087	142.955	268.688	270.855	402.665	156.099
LDLRAD3	5.04899	13.0254	4.16034	3.71032	5.36699	5.10903	35.9961	4.51463	10.7267	4.02015	6.04077	9.54039	22.9476	4.12117	4.5192	5.28822	14.8568	7.55295	4.69426	6.6268	7.42029	3.74323	4.86523	6.00568	6.01566	3.73024	3.84879	4.78753	9.727	4.34394	9.43797	6.82252	8.91831	4.87377	9.34991	4.76291	6.17979	3.67471	6.4408	7.15744	4.82589	6.95981	7.2586	21.6819	11.9375	3.34749	10.0288	26.9582	5.04932
PKM	276.535	800.493	371.149	497.645	625.067	303.517	468.75	724.724	225.74	296.27	294.369	339.3	355.267	595.604	385.671	524.887	397.683	503.506	333.105	432.396	293.112	207.178	387.879	181.66	419.825	227.448	178.803	784.512	619.752	628.858	428.014	540.467	117.797	321.717	612.426	353.18	477.771	322.624	235.637	332.072	158.53	558.234	864.393	797.862	814.151	787.113	665.562	489.901	445.756
Z83851.4	11.0897	9.74268	6.87396	8.92635	17.135	7.49502	10.1415	6.5589	6.35163	8.76198	6.25487	7.69334	14.1105	6.89695	16.5607	13.1417	13.3348	9.41946	3.90085	7.75475	7.39138	3.61321	5.32684	6.13265	11.2434	6.1206	5.55995	11.0589	21.0649	8.51179	21.3923	8.72452	6.95	6.02458	7.24889	5.75294	8.76055	11.1482	7.29833	8.1242	5.56085	12.3329	13.7879	12.8217	22.9092	12.7911	26.4788	10.9158	6.95733
TNPO1	22.4143	41.6574	46.4705	17.5925	29.9773	19.9769	82.9368	34.3157	26.9521	12.9619	17.8323	26.8157	34.6785	23.6571	35.7359	23.6418	24.8176	22.5787	13.1944	22.8325	25.1432	42.6147	33.5469	23.2098	30.4276	14.0357	10.2741	24.2421	29.7742	24.3354	15.8532	47.6592	18.3712	43.1071	36.9509	29.0365	25.2555	15.7348	28.9984	26.6667	17.6093	32.3131	45.6655	47.0454	25.0947	54.9603	47.804	35.3287	16.3747
CDCP1	50.4879	119.416	8.06059	5.73677	31.8746	20.9386	4.2682	44.2025	21.9156	13.9076	28.7963	18.0949	37.5755	18.997	4.77273	61.519	26.3095	63.9374	7.21494	22.3082	16.4029	29.123	37.3568	22.7583	25.8068	27.9645	16.4743	39.7039	112.086	34.248	31.8616	20.973	18.1981	22.6551	33.7254	15.1591	33.3052	13.6058	23.5807	31.5058	7.66568	17.4346	102.601	110.828	47.6084	37.4732	48.4418	27.6424	25.5099
TLDC1	8.21355	13.1816	7.43536	6.18548	8.8608	8.25811	7.74127	15.169	9.62515	6.35542	6.21553	10.6382	12.4372	6.64357	6.20029	10.7854	11.6667	29.7047	5.35045	4.84047	8.0795	4.87428	13.7188	6.62565	10.2582	5.35468	6.63019	8.47332	14.6684	8.72167	12.8098	12.0461	8.55804	9.068	10.4807	8.49894	10.4467	14.1136	8.3426	5.44699	6.72288	8.22913	13.8612	20.8638	13.2067	7.52258	15.093	4.62746	7.51773
MSANTD3	20.5693	22.4068	24.8335	13.732	13.7613	10.2819	49.7191	23.7238	18.6015	12.4247	11.4583	17.0204	27.8414	12.7194	18.3886	19.8106	20.9469	13.9311	14.9456	13.3116	22.3338	24.2134	18.2598	16.6572	14.1793	19.5298	10.7514	31.7067	42.1019	14.7165	12.5182	21.5336	14.1141	13.1808	23.7729	15.2652	20.5072	7.70383	11.6133	20.9874	12.0569	13.4423	38.1284	44.0313	13.3636	23.8681	26.0928	42.4026	11.5403
RHOF	6.27772	7.7112	3.38688	4.8097	4.47561	3.50672	4.91327	3.42781	6.28319	3.3199	5.64298	6.67097	7.24266	3.86174	9.5959	4.33415	7.36383	4.7759	5.33363	4.79145	3.8042	3.0585	4.23231	3.32655	5.02581	3.62577	2.27651	11.2829	3.14046	6.17433	4.05871	4.22187	3.32195	3.72232	5.79141	4.68402	4.30593	4.51839	3.74362	3.43135	4.62833	4.55856	8.30703	13.9318	7.22181	3.5251	11.1564	3.43313	4.58898
LDHA	165.233	780.891	429.331	362.862	229.601	223.902	344.264	840.559	246.978	150.059	196.283	276.118	322.374	361.422	311.331	351.256	389.501	300.297	291.592	366.451	356.936	408.708	311.768	212.114	319.422	283.026	177.913	629.263	527.245	380.39	320.265	405.965	270.843	174.039	956.271	240.027	290.549	170.985	224.997	385.048	112.67	265.718	291.894	992.098	210.24	292.322	422.355	701.384	318.317
AMN1	5.30054	21.4504	7.4457	5.24329	5.91128	5.56386	5.02722	9.03375	6.23497	2.52891	4.14267	4.84614	10.1792	5.69246	10.4666	7.17547	2.9005	8.8035	3.78361	7.70494	6.39485	7.07474	7.55333	4.71956	11.9746	4.82302	3.36768	7.01567	5.56996	5.21291	5.44881	7.34746	4.13814	8.91015	5.26987	4.82937	7.0825	6.03453	4.51609	4.5355	5.74145	8.08015	11.638	7.43061	7.03648	18.7688	13.7724	19.314	7.55025
HSPA4	62.3681	67.4815	79.0099	51.2246	56.112	41.7986	207.976	98.773	57.596	30.6718	41.1688	72.6316	66.2031	85.6657	57.7914	64.3135	58.4584	43.9126	34.5309	56.1997	59.2435	52.4189	74.2746	46.0211	76.2104	41.0916	40.5313	90.4534	80.952	73.6292	49.9097	96.1426	46.2194	98.3201	56.714	61.2038	87.0936	42.8233	54.0137	50.4186	32.349	80.6323	65.7103	113.602	59.6434	99.5986	114.029	75.3157	68.9844
SERBP1	67.6234	77.5506	107.658	87.1268	80.3082	79.0709	264.576	37.2749	88.0217	61.8823	54.5399	97.9694	105.608	73.455	116.562	111.006	73.9857	91.6054	87.6293	38.1752	92.4683	70.5276	101.662	61.3093	72.7473	75.3582	51.1021	82.6506	115.42	99.5658	144.068	115.188	72.4011	87.7887	97.0823	86.0876	70.1264	75.8778	95.8528	65.0076	56.1208	101.387	152.685	165.122	62.9109	165.372	135.105	128.07	71.9924
CFL1	283.933	495.674	276.662	367.797	362.468	266.885	413.096	517.333	347.321	409.245	321.889	406.104	535.617	320.898	448.357	519.001	443.683	371.562	317.251	371.632	352.987	198.362	409.438	222.241	311.053	294.284	198.445	689.348	436.318	557.607	477.803	371.432	250.333	275.163	462.7	315.105	370.027	244.781	157.183	301.789	271.167	350.387	800.175	435.663	326.53	482.975	433.574	572.44	372.748
MESDC1	11.1539	26.6962	20.4603	14.2809	23.3624	12.6211	12.6859	11.6696	16.7984	17.2681	16.4022	17.7995	23.2415	20.8112	12.4024	34.173	23.4828	16.0095	15.668	9.61887	20.0825	8.28063	21.1029	21.6875	19.9396	15.6825	9.55308	17.0953	20.389	43.9163	18.3318	13.2126	6.01276	11.7772	23.2032	18.3052	15.2262	22.1142	14.5356	18.204	25.1767	15.8319	21.6004	19.8459	14.5606	45.7536	33.7271	15.789	20.3821
GNPNAT1	21.6662	46.2907	53.0301	44.9762	10.8825	23.0886	68.1576	17.4602	27.9819	13.4458	15.9947	49.6124	29.3858	13.3695	41.1396	22.5211	27.1314	28.2412	24.7618	11.3251	76.3141	48.8771	24.503	10.9047	37.6167	10.8396	8.86175	20.9772	22.333	128.772	15.7445	39.7434	15.744	19.8752	23.6518	22.2297	18.9177	16.9476	14.0751	28.6457	9.47071	23.6021	52.81	81.0801	11.6109	65.002	54.4062	55.3863	23.9744
SPECC1	5.14112	9.42007	5.23487	3.54897	9.62723	5.20578	10.065	6.0882	7.73029	5.86828	6.81987	6.75167	9.72313	9.77724	6.31773	24.9266	8.49533	4.89629	3.33403	3.9975	10.0373	8.80443	6.36049	4.99178	5.42518	5.00584	3.99239	6.03527	14.3111	4.73957	8.42242	13.6914	4.13011	11.8156	11.8593	4.82498	9.15805	4.96441	5.28699	6.54155	5.71498	6.14775	8.5249	11.6796	7.09621	7.22659	13.5623	26.4629	5.10794
TLE1	32.9703	24.7444	6.50525	18.6945	17.0226	19.1263	47.7914	14.0491	29.4166	15.7929	16.1359	18.406	16.487	13.5186	28.7106	7.79508	14.5396	24.0865	44.5995	15.5355	33.4498	7.58051	38.4515	14.4578	12.9675	32.1451	9.59836	18.4845	17.123	12.0547	25.7577	9.96867	14.9826	13.1183	28.2449	16.8263	18.1122	13.6223	12.5938	29.4177	16.8203	19.78	21.5868	35.2584	21.4693	17.2139	25.8538	29.4243	15.1005
PGM2	17.0591	42.8592	12.2648	17.9926	22.7244	14.8469	127.248	11.7288	16.6994	7.59466	15.7166	11.5354	24.6329	15.7919	26.9776	22.602	14.7042	22.6252	20.1489	16.8804	19.9251	16.1499	23.3143	18.1003	19.7182	13.5696	5.6603	23.085	29.2271	23.955	16.6644	34.2427	11.4542	16.746	39.0036	13.0336	17.1688	18.4052	11.6104	10.7055	14.4333	16.3668	43.2521	37.4945	31.1655	37.7277	49.4012	41.1729	13.9652
FAM83B	8.34224	11.3172	2.56939	2.48787	3.22613	2.22231	7.8567	2.68981	2.65283	2.05298	4.38589	2.57703	8.2098	3.38662	2.83937	2.90221	3.2421	2.69127	2.25632	3.17212	4.93578	6.25185	3.13361	2.69178	2.82842	2.92247	2.46402	2.77809	17.1998	4.64039	2.68128	3.17892	4.06672	10.109	6.74438	2.68829	3.27221	2.62913	4.53213	3.54837	2.30425	2.8034	3.1302	7.23066	3.00997	2.83331	10.4985	5.59939	2.51459
AP1S3	8.47739	37.4118	8.87401	17.8033	8.86526	7.35725	9.7072	8.82744	10.6899	4.3516	8.2813	12.9098	10.6868	8.46378	6.76091	9.02536	7.08918	11.1233	6.04541	19.3512	5.23358	8.48799	9.63644	4.99146	13.671	5.05039	3.04524	10.7571	18.8816	12.6286	12.6999	17.6172	4.86129	10.2347	14.77	12.6392	9.11301	7.24884	5.37479	6.31694	5.87756	10.5731	27.7652	23.8784	12.5376	14.8619	20.0686	7.97066	6.54752
ENO1	1262.58	1487.14	1182.82	1820.31	2054.87	1360.24	3347.32	1153.14	1058.11	1143.74	575.036	1880.21	1914.38	1385.82	2739.83	1600.79	1109.51	1867.18	1184.04	2433.23	1153.81	718.977	1079.79	944.464	487.315	948.829	1514.24	4421.39	1278.36	2967.35	2016.25	1762.15	1007.19	976.168	1186.75	1609.32	910.392	1824.21	741.217	1948.78	482.409	1585.04	1944.95	2344.07	1289.64	1867.64	1634.58	1336.27	1845.76
PXN	45.9705	94.0232	31.5289	33.5544	43.0402	37.2866	73.0216	66.3886	56.8323	23.8616	44.3144	53.4134	81.9083	48.5286	78.199	38.8201	47.9362	71.7884	41.7679	37.3727	35.8918	14.3417	51.391	49.8588	33.8291	21.9845	18.616	54.2869	128.609	53.3495	54.3449	52.868	36.928	51.4812	48.5532	40.0984	34.4505	49.5396	52.8843	35.8648	53.7152	44.1892	130.624	171.302	33.7703	22.169	57.6594	14.8308	32.8059
TGIF1	26.772	34.737	26.9616	25.1794	21.9376	17.6636	43.3473	21.014	22.4212	17.6741	18.2056	23.2899	61.8536	24.0303	34.3359	29.9832	62.6214	60.5112	30.2958	32.2254	44.4663	21.7484	26.394	17.9696	25.705	45.8473	17.3678	21.7963	38.6196	18.4532	28.1403	23.3747	18.3767	29.0431	29.346	18.2175	34.8066	25.3821	16.1871	22.3351	20.6933	13.2024	30.6668	38.7352	29.9653	57.2203	47.4717	48.7112	20.2913
C1QTNF6	16.3663	24.1941	15.3446	9.38193	13.8091	20.1439	4.53322	3.50313	20.035	7.9031	6.08321	12.9169	25.2021	7.59866	14.146	8.52066	47.1902	19.2315	8.75316	7.93078	17.9566	9.45371	12.829	6.09477	21.7935	7.446	7.0897	23.8033	24.554	7.35028	36.9457	15.0709	7.39528	6.72999	39.9165	6.17344	6.8579	9.62144	4.36486	27.1721	9.68081	11.9224	14.7229	26.9772	8.33127	7.89791	60.3575	6.22881	11.8983
DDX56	44.6238	91.9887	49.6809	53.6084	72.7061	67.7747	88.5174	70.8266	45.074	71.6981	32.3033	64.2157	43.4097	53.3378	67.5322	57.122	63.4961	49.5896	31.2654	47.3385	50.0778	34.2253	43.7571	33.5112	75.9342	61.1363	75.3581	95.5563	70.0304	69.8534	85.2868	77.1413	83.7572	36.6813	64.0744	72.3693	32.5627	75.9847	34.3043	83.4137	39.1439	60.508	91.7911	74.9203	82.787	93.7828	70.4934	50.628	86.0552
MYO1E	24.8527	48.1443	15.4708	13.3263	24.2235	12.8168	7.91384	18.5735	33.9612	8.3535	22.4912	18.3548	31.7924	11.5699	13.8741	16.79	15.1479	13.8562	32.4787	10.6174	22.3847	15.1895	19.2161	16.4176	22.5866	11.9541	7.22522	29.6786	31.963	24.3277	18.4469	26.6556	12.7901	8.6257	33.0054	16.252	18.5748	11.6986	20.813	18.3443	11.9766	23.1812	41.7869	43.4204	17.0527	27.9918	80.3834	20.0555	11.8468
SLC25A15	9.92181	11.618	15.9624	14.8336	6.31844	6.50211	17.9416	5.47752	9.86817	4.60441	7.00985	14.3598	12.4573	9.45178	16.0347	13.0499	3.61988	6.9518	5.99688	6.23152	13.1469	17.3548	17.1002	9.3707	11.1822	4.92411	3.35481	8.10101	9.6565	13.0686	7.24652	15.2552	15.0547	18.8721	11.5012	17.2486	12.0241	10.6709	14.9758	6.19088	5.59525	7.54238	14.1137	14.8328	10.4257	25.6722	21.849	28.3527	9.50755
LINC00857	4.94786	12.8155	4.7306	10.0195	6.61084	4.42696	3.30726	7.60569	3.7309	5.32615	6.32238	12.2741	9.13974	7.84621	19.8984	11.1373	6.71778	16.6422	3.90767	4.64823	11.0394	2.60962	8.95667	4.66898	8.16374	13.0192	3.07882	11.5551	9.62731	10.7094	7.43749	7.11871	4.93341	9.44439	8.74308	7.01395	6.46229	6.51747	3.49266	5.21231	3.50499	6.7276	11.5982	13.1508	3.60516	11.8459	26.3734	2.8076	7.57547
PPFIBP1	14.8989	24.1975	5.24003	7.74968	10.5012	7.44482	23.7581	3.56226	14.5156	3.65584	11.7123	12.9112	10.8443	7.6155	13.0717	7.28599	4.71508	15.5799	13.6077	6.60906	13.511	13.4846	9.04122	11.0862	4.47815	4.61208	5.52979	25.0265	48.5616	9.2925	8.8078	14.968	14.1262	11.5652	16.699	10.1093	16.712	6.34404	9.38802	11.9156	15.831	13.1975	29.3166	14.1705	5.93588	29.0286	24.9493	29.0478	4.77382
BZW1	47.5848	78.6173	59.628	40.2842	38.8217	29.6995	58.901	69.9896	43.8334	20.2763	21.9449	45.2349	65.4395	56.8838	45.1197	55.0985	135.72	37.9543	35.8334	59.8462	52.8731	95.125	64.9453	38.2372	58.949	52.5328	13.641	40.7354	102.088	84.7067	36.1228	73.3075	29.6209	66.8743	67.9503	36.99	62.2974	28.2271	29.9883	33.5126	23.0767	35.7108	79.6859	90.2619	45.7583	64.9619	63.9891	82.4812	46.7963
AHSA1	76.2164	110.441	112.674	85.5996	77.4253	105.826	146.282	84.1591	66.4442	36.9618	42.4462	92.6701	74.1696	61.6352	76.5629	97.9533	122.984	67.3595	125.674	87.6461	89.7722	68.545	99.7606	33.1251	120.881	80.1048	53.6395	98.2309	66.2546	134.756	175.474	83.4648	38.5573	66.6847	68.4487	50.9933	66.6659	94.4361	61.3654	58.9459	52.3686	83.5674	145.638	124.35	71.6544	192.296	110.559	388.106	123.842
FAM207A	29.8808	43.3932	19.6029	19.6208	30.8184	20.8076	34.4665	23.7463	18.2917	35.4706	16.004	31.7636	26.1426	17.6073	25.2644	23.0497	26.9208	23.0916	17.0308	16.6083	15.2934	8.36883	24.5932	16.7834	26.02	45.5889	17.9651	38.0081	11.1329	30.7929	39.5645	16.6746	12.8229	17.8319	20.0174	14.1452	17.7093	30.6273	15.2613	40.9774	19.9087	25.1731	21.3169	30.1422	36.547	37.3539	22.8895	45.0742	46.6044
CSNK1E	61.2641	51.1297	69.6004	40.4814	61.4007	61.6546	54.0817	21.2008	51.02	33.6418	42.7654	68.9106	78.9681	63.2672	141.678	73.2104	61.6107	77.4259	32.1394	25.3684	64.8092	18.8957	39.7049	40.9074	66.3641	39.2872	39.6874	80.365	72.2475	36.0918	78.6924	60.3119	28.7033	48.344	76.8896	37.5681	64.262	69.1819	33.4388	52.0305	49.1506	61.8732	68.9992	62.6971	60.0501	57.3562	91.9709	68.8004	50.2009
BCAR3	15.906	28.9171	16.1225	13.1248	10.3383	13.6384	5.46541	9.76537	15.2187	7.49022	14.4601	7.71332	22.7136	10.0939	18.5539	9.83084	23.0055	26.8848	8.50758	6.5754	7.38007	8.32124	7.52867	7.74552	7.62126	7.28083	6.44734	11.9113	47.3868	10.9035	16.9707	14.8847	14.4837	10.2177	29.062	11.3518	7.80443	6.91708	11.2906	8.84229	13.5907	12.4956	58.6699	41.6245	28.3909	5.41162	16.5066	11.8243	7.86269
RP11-739N20.2	4.53619	8.62443	3.4358	3.36445	6.11815	3.56827	3.07059	2.68981	3.72236	2.10204	5.04538	3.36593	5.50721	4.47032	3.05114	4.86039	2.62932	5.9951	3.38332	2.91227	5.48978	3.26167	6.3486	2.94118	15.8944	2.47713	2.80195	5.35755	2.60875	9.9257	3.60579	4.2116	2.33696	4.48167	4.93122	3.62122	2.86335	4.84857	3.43777	3.35799	3.67373	4.39677	7.85511	5.98933	4.32498	3.11397	10.4657	3.45851	3.76099
TUBA4A	70.7893	236.828	37.8594	99.7146	65.5964	61.448	7.73135	109.731	48.8699	44.7415	48.1053	62.5883	64.9384	49.9564	110.543	70.5738	145.363	74.6048	61.5951	65.1044	84.1223	21.5003	48.182	23.6761	58.7856	100.393	81.8782	170.787	161.26	137.957	119.3	96.1987	43.9187	41.4539	43.6575	41.9057	37.3253	33.856	41.6949	44.0674	31.7699	57.6434	100.268	249.272	27.3855	53.8645	102.7	15.256	85.5709
LAMB1	43.6341	89.4084	37.0506	28.4084	41.635	31.1445	208.324	5.37017	106.412	13.9599	41.6825	29.2149	138.416	15.2469	87.9237	76.7228	25.0413	38.2863	30.9759	15.0154	62.9761	33.1952	26.0341	46.7564	31.0422	12.5007	12.6023	18.7332	147.871	29.1775	44.1094	73.561	43.7547	52.7572	136.623	34.0033	28.6839	14.319	49.3878	56.9679	66.6807	65.3539	141.208	37.8755	15.6401	53.1878	82.3814	37.4827	21.0509
ZNF185	21.3157	74.0141	18.8704	44.6581	30.0654	13.4877	11.2213	12.5092	23.9158	13.3282	33.0316	28.6313	19.5004	24.7541	26.8945	9.9288	9.22225	40.5071	16.6292	21.244	14.5877	15.6991	21.4755	16.1291	24.7367	24.0549	6.47926	45.1731	46.1329	33.7519	31.5769	35.2763	13.1101	36.4241	25.1582	22.1854	25.066	17.5502	17.2349	23.0918	18.0605	24.8648	234.269	128.307	40.6921	10.6941	21.0513	9.95908	30.2187
B4GALT1	118.333	179.085	175.274	144.103	86.6574	114.64	313.832	271.78	238.53	173.369	91.925	198.635	213.425	97.9801	182.967	201.24	503.834	112.651	177.593	72.1559	264.532	170.213	132.506	111.195	119.786	122.301	143.124	140.221	154.829	147.772	153.923	435.225	115.371	85.7381	230.064	116.595	95.5001	60.4068	106.152	167.108	73.1818	149.181	175.591	724.033	143.096	65.2199	265.858	71.894	123.999
FRRS1	4.85276	6.97918	4.74662	4.3784	4.1146	4.66231	4.15543	3.30171	4.98978	2.77949	4.34789	3.97375	12.0688	4.26693	4.27682	4.53825	3.08123	7.64504	3.06732	6.14101	4.40581	6.47296	6.61755	6.05105	3.42125	3.50792	2.48192	5.60856	8.45336	5.10262	8.39878	4.68062	5.80654	6.41985	8.94952	7.02387	3.93265	5.76938	6.47659	4.81859	4.84228	6.0017	9.20303	8.37301	5.04105	12.4708	16.8992	11.4756	4.5952
KRT8	248.73	3651.06	519.764	766.244	475.155	420.625	1378.43	529.624	519.806	516.754	322.196	1429.18	1100.88	632.785	1492.8	881.582	1647.52	504.097	401.036	566.765	796.862	246.382	584.118	198.966	753.517	676.251	589.377	596.421	208.705	740.485	919.532	779.703	188.172	197.872	558.572	347.25	696.477	842.839	196.248	336.544	149.459	389.195	890.874	792.325	345.969	1576.29	1185.16	481.422	426.565
AC005355.2	3.44304	17.597	4.25391	2.79955	6.0223	3.27428	3.07059	6.81048	4.08966	6.3691	2.55982	7.07952	13.9388	4.95618	5.86547	5.99844	9.1973	2.98703	2.5262	8.58652	3.80498	4.00859	3.09603	2.95066	23.649	2.71322	2.29056	43.6216	3.05857	10.7949	3.22126	3.28486	2.2651	3.85376	2.97898	3.37984	4.23799	6.65378	3.60662	3.90975	2.80528	4.95125	8.18148	5.07591	3.43248	3.38566	25.5643	3.75281	3.26719
MFI2	11.2073	56.0171	8.56111	3.7879	4.02361	6.15876	9.09053	4.82278	5.1241	7.44659	9.50405	7.17009	36.3044	7.77414	3.84893	4.65074	35.7353	10.9411	7.16263	4.04357	4.50205	3.25456	5.04279	3.32506	20.9515	8.20567	11.1355	69.066	11.3539	14.4762	6.87036	4.65911	2.82458	4.38313	4.55168	3.78355	5.42354	7.61896	8.62029	10.6643	4.04225	5.37143	43.4091	48.9802	11.0413	7.27572	8.01795	29.7687	6.88699
GJB3	17.7246	41.4646	3.65301	3.89466	3.15468	12.2614	3.17821	3.66334	8.81412	2.82281	21.6908	10.3161	13.9556	14.3081	2.91884	4.52075	63.5878	5.73017	3.6748	2.64994	14.1282	5.47177	4.41326	3.76556	11.1048	5.16874	4.30921	10.971	72.3677	12.2038	36.5279	6.36812	2.26102	3.38045	17.524	2.84416	12.228	3.00242	4.26072	2.73044	3.95399	3.22895	44.967	29.5467	27.9966	4.22423	55.9171	2.76901	6.4664
CD109	18.239	42.0183	5.82145	5.11212	5.16979	6.82636	5.7123	2.91931	9.18698	4.5356	7.48268	4.20624	11.0276	5.7392	4.75997	4.74027	5.25914	18.0342	10.4466	4.20443	5.90909	15.0022	12.4623	5.97502	7.05235	4.99651	2.46438	23.6826	77.0488	19.68	8.47931	10.297	4.87504	5.4579	10.6023	4.31728	5.89115	4.23276	5.15651	14.9652	12.193	6.75488	70.826	54.0968	3.918	5.86392	17.1128	10.6094	6.62525
TMEM171	7.01186	12.5838	3.11802	2.43055	4.23488	3.09991	3.29374	5.07278	3.17523	2.04409	8.92293	3.34906	3.57571	5.73969	2.89862	5.97111	5.4457	5.42898	2.54827	2.65418	2.86965	2.3015	3.50062	3.74173	4.59041	3.30069	3.62842	4.19369	12.6651	3.01529	3.07391	3.76567	2.55363	3.16478	7.64626	2.7779	4.31653	6.3565	2.9345	8.70639	2.88237	3.25999	8.62008	13.6972	4.98518	7.03222	6.72544	21.7614	3.39084
RP11-284F21.10	11.1702	19.6858	4.04429	4.28999	7.9959	7.32454	3.15032	17.3015	4.10742	2.38499	9.37575	6.7527	5.71837	25.5471	3.09728	5.01886	19.2898	5.73348	7.41796	7.94645	7.58259	7.66839	3.51323	3.17776	38.2488	3.10187	2.0493	26.3304	3.93785	6.02748	21.3343	34.9985	3.05913	31.0007	8.02215	5.06337	13.3295	3.7499	9.16636	5.32511	3.23381	3.1617	5.0641	65.7933	2.99296	62.0035	56.8475	2.95102	21.8812
ASPH	41.0028	260.608	5.75306	11.3328	26.0027	46.3387	58.4926	71.0969	25.3302	12.9726	25.227	47.1371	41.7892	49.5557	68.633	7.5695	101.477	65.4253	27.9264	53.6333	9.01362	78.3737	38.0074	61.4504	21.5758	35.4287	9.8106	150.354	40.3245	74.8876	20.7119	32.4714	35.2584	24.7165	31.5662	14.3171	29.0187	22.5794	75.3329	42.3987	20.5589	26.7127	102.347	848.119	12.4798	48.0706	116.084	28.678	95.9825
ITGB1	121.635	363.503	206.778	170.774	92.5767	97.9645	574.245	45.6448	194.457	27.312	123.072	165.272	152.292	75.4415	229.762	111.94	175.495	182.458	491.843	80.5673	217.173	197.071	224.544	119.728	126.037	72.688	16.183	55.4865	437.353	80.3401	70.0226	284.11	109.266	304.248	233.568	97.2208	226.505	37.6132	140.875	97.2096	111.728	110.505	188.588	421.996	130.883	168.147	238.207	320.081	50.5218
RP11-479G22.8	6.31889	5.80814	7.86245	5.67408	6.77068	5.46862	16.0597	4.13333	9.1782	5.4259	4.48796	5.64399	7.73995	6.39847	9.26119	7.03015	21.5522	6.36236	4.91904	4.05152	5.80681	4.76135	6.20189	5.21462	8.34509	5.34977	2.57939	4.44389	11.033	5.59043	6.69235	7.05237	3.93418	9.5205	10.5849	4.39093	6.7038	3.90588	6.28565	6.35075	5.8904	4.14849	5.90562	9.34207	5.42517	7.98261	7.67359	6.06784	4.31364
PLEK2	26.2586	114.784	29.8506	11.6609	23.0084	23.3086	22.4095	21.7235	18.7781	54.5058	27.025	25.2121	21.4252	14.793	7.94801	35.6542	115.529	16.6568	40.7735	30.1869	10.6126	18.4285	77.9194	22.1448	16.8032	18.5213	30.1421	45.0084	132.393	45.6692	36.7922	22.105	15.2403	16.3498	23.5179	23.2682	16.66	27.0873	17.9287	29.2453	8.77447	16.0143	74.2568	55.104	7.6594	30.1491	54.7362	73.321	33.6413
SLC16A3	98.679	161.694	46.5595	41.2633	47.5266	51.1037	49.635	38.7147	67.4373	118.186	44.6739	40.559	67.1017	64.5754	68.0015	69.669	195.599	73.4412	86.9954	44.2025	59.4104	36.5321	41.0035	19.4225	69.3646	29.3741	11.1147	328.825	49.3203	111.454	72.2781	61.4532	14.1943	26.3368	78.3145	33.2067	63.2949	23.0723	10.6991	55.6757	27.2338	35.101	64.7662	142.787	26.6595	32.3697	78.5555	33.2797	56.4072
PDLIM7	73.4731	46.8564	24.8864	21.9058	41.4798	57.3176	31.4606	14.1049	56.495	24.9609	41.4519	26.5571	36.2647	40.5003	26.7187	20.6469	42.618	34.7805	45.7106	21.7556	25.7236	18.9386	26.2984	24.0605	23.3079	38.0164	26.5858	57.2427	46.9464	37.1827	121.907	30.3761	26.0644	18.7594	55.9302	19.8155	24.2742	18.7832	16.5077	66.3695	40.4507	52.8397	46.1492	36.4304	24.155	29.8073	37.9382	39.7421	38.5721
CSGALNACT1	6.06269	9.00491	20.1675	9.92153	11.0516	7.70699	5.15293	6.58116	17.2375	4.61219	9.14395	6.41743	8.70207	9.81461	7.87773	7.65441	51.8325	10.4136	4.51894	4.80802	13.5945	6.6415	8.41188	8.30129	12.5683	4.9875	3.59978	3.99742	15.0802	7.64609	9.64661	9.63264	10.4128	10.8224	19.5711	7.67984	8.96869	6.47788	12.9056	7.9036	9.93266	15.4623	8.57836	8.15586	5.10365	14.407	22.8788	6.19381	5.55124
GALNT2	38.1024	51.3203	58.8154	30.561	38.9921	51.3895	23.1552	37.2758	50.1278	31.7243	43.3932	46.1693	55.6853	63.3352	44.807	52.4024	51.8235	48.0057	41.9915	24.0587	42.7793	19.1529	67.6688	53.217	44.5322	21.126	19.9312	44.5275	42.5065	47.8444	53.6537	67.9675	30.6829	121.171	84.2762	41.6303	46.4995	49.3755	49.0266	46.3088	22.7406	46.3334	62.5844	73.6267	35.0823	39.2246	87.7803	24.8837	39.2031
KRT8P3	3.99451	117.589	3.52421	5.81346	6.30426	4.03317	14.3587	4.73903	4.63614	7.03927	3.0479	5.89654	21.3925	4.29206	15.8282	12.6986	5.82464	6.6528	2.77178	9.75488	12.6327	3.48746	12.1286	4.68102	5.26307	3.31813	2.20954	12.6986	5.35796	5.1343	14.5662	37.1883	5.49604	4.92074	3.8042	4.79605	7.11872	7.77526	3.63995	6.14984	4.52434	4.3459	10.1291	10.9881	9.58579	26.9773	8.52832	7.68329	3.52745
AKT1S1	25.3616	15.5115	24.819	19.9383	18.5445	23.6832	21.7741	22.7627	23.6298	19.5303	22.8096	30.7064	23.2097	22.8132	20.6256	24.064	25.239	19.914	51.1986	13.6524	18.7667	9.86762	27.4682	18.7891	25.0784	21.7344	26.7626	26.9749	22.4504	41.1537	32.3708	29.284	14.8362	25.5573	29.6233	27.7256	21.4263	29.4745	22.3779	27.5188	19.3775	23.9181	42.5266	30.4104	27.4968	29.695	26.0524	21.0658	21.4136
FRMD6	10.2369	12.6002	8.9834	6.21444	7.4208	12.5729	29.4363	3.86894	10.7353	2.89653	5.89749	7.31886	6.18264	4.42026	16.2252	6.91984	6.50617	8.43736	4.25523	4.46442	8.42874	23.0215	10.5814	7.60591	6.08797	4.49687	4.19213	4.44674	59.1094	7.32869	7.78831	11.3659	6.85413	4.31929	14.643	5.89016	6.15643	4.62138	27.9253	22.4326	6.18602	11.1657	26.9867	10.3203	5.36691	5.67637	8.00693	9.31719	6.95752
SULT2B1	15.8646	12.5364	12.3534	6.69265	7.56509	8.88688	3.25266	6.77664	12.8382	34.8283	9.06374	23.9074	7.89059	23.0367	35.6914	3.44716	16.5416	15.1564	3.68553	8.68102	9.49811	4.32889	5.88473	4.18077	32.1226	27.0153	2.80391	25.9669	3.9145	7.66297	14.924	9.86518	2.98107	5.97901	9.34417	21.7535	6.6166	7.09953	4.85742	8.11477	9.26182	7.07041	4.37032	26.545	3.60524	14.054	59.8923	4.25331	11.5546
EPN1	25.8036	20.9141	26.107	18.7165	18.112	21.1272	25.938	16.6142	23.5023	24.7734	27.1803	22.4698	26.1515	27.1374	20.9922	23.8151	17.2286	15.0097	17.7742	11.6307	12.626	7.72865	23.134	19.87	28.5754	29.0773	19.6589	24.8435	12.3552	37.7189	29.7418	22.0269	15.6593	27.6738	16.4059	22.9035	26.3091	27.2121	22.6895	29.82	19.6966	26.598	36.1114	23.6485	22.3578	19.1031	20.8209	15.0716	17.0806
PLIN3	70.703	136.811	64.1344	47.8017	63.2539	53.3792	71.811	64.4179	89.8573	33.2011	91.537	113.758	63.898	95.59	76.3998	64.1851	63.6778	65.9361	72.0866	39.5637	82.5457	44.1798	149.767	60.3449	56.358	57.7669	13.9827	134.126	63.6444	76.39	53.3568	82.7177	65.767	32.9338	105.34	59.8639	62.0894	57.3626	58.1244	48.614	39.4117	59.6709	86.5007	157.476	75.2523	45.8554	136.208	60.2761	26.8873
PLCD3	7.68546	15.9469	6.43386	3.89183	7.21341	5.82413	6.33595	3.96039	7.47825	4.65569	24.5587	6.45554	16.4144	5.85783	7.74176	8.2546	16.4298	7.17678	5.80979	4.00516	5.89882	3.2998	9.98403	3.65456	18.0249	3.49643	3.66691	6.94441	22.9848	9.48554	8.32613	8.4479	6.93865	5.47598	13.2304	4.42449	8.93466	4.22254	6.92827	7.89054	8.56658	7.02822	10.3843	11.6314	6.46833	8.36008	13.88	3.67636	4.21268
AP3S1	49.4363	56.3218	50.4215	32.6604	34.7421	27.5567	41.0419	67.6576	45.9587	25.7074	31.2388	34.075	38.0551	57.2568	53.4217	28.2225	51.0094	34.8586	40.5118	45.7238	28.2014	44.544	31.4319	25.1853	43.9568	44.2784	30.4299	85.2287	61.4348	58.2736	27.7508	37.1341	25.1244	41.5976	65.3118	44.3118	46.2236	21.8985	30.2776	50.5209	31.7359	40.4973	39.9822	71.6212	34.5517	27.9051	38.7256	34.4658	27.6651
S100A16	436.833	762.06	275.295	87.6019	190.676	235.64	64.5414	237.39	214.553	103.522	208.878	575.992	241.937	466.211	256.048	88.0685	1360.58	378.805	79.624	322.852	297.358	216.312	356.97	125.95	379.944	624.396	182.965	334.815	588.499	477.062	564.574	262.65	77.0456	262.961	729.377	190.221	182.569	97.9134	104.246	262.409	158.099	151.594	1098.73	594.941	395.337	239.153	579.519	37.8841	309.803
TRIM6	6.77318	5.82398	4.55063	6.21379	12.5084	6.18113	6.1081	8.6537	4.32314	3.97065	4.12367	4.69641	5.14014	6.82863	28.6786	7.32595	3.585	19.3894	3.20247	12.4165	3.29909	19.9906	4.61918	6.85805	3.18594	7.62149	2.44671	6.9494	5.38425	10.3964	5.5302	6.70848	17.2817	4.65093	8.86368	13.3895	3.80187	4.29259	5.78441	7.67624	4.63691	10.2751	6.33794	17.6024	3.37688	3.30943	15.0596	3.25718	7.26504
HAVCR1	2.57776	20.5191	2.70921	2.53605	2.90159	2.64665	5.14083	3.37002	8.88916	2.04409	2.62124	2.82009	4.07345	3.01099	2.86158	2.79937	2.3361	2.53045	14.8724	3.43058	6.64359	2.26028	3.1224	2.61119	4.19515	2.49191	1.86083	3.16663	2.88655	2.60758	3.07335	15.8053	13.1216	25.8947	3.34743	7.27502	10.2424	2.78175	3.03412	2.67074	2.5621	7.65973	3.59918	7.204	2.82424	2.56251	31.4802	2.9248	2.34753
PLEC	281.375	93.1562	22.3881	77.5169	84.4748	98.8878	35.3574	47.2635	136.626	70.7562	106.202	76.7178	50.3814	98.5783	65.5559	39.6961	97.838	123.758	96.6608	16.1351	56.5361	18.4309	63.0644	34.3015	175.706	24.7376	26.958	127.911	111.847	101.157	112.769	96.3843	32.7249	59.6566	72.4958	58.9571	57.2376	63.91	53.5935	86.0518	69.497	66.8789	227.487	325.121	50.5001	138.221	107.516	12.5807	79.0722
CDC42EP2	15.2586	36.1763	17.7971	9.89987	35.3658	15.781	12.774	19.8724	16.6977	26.7124	36.0492	19.1739	24.695	10.3571	13.2001	23.9434	47.2128	10.546	17.1449	5.50569	14.5873	7.80233	9.07032	9.82567	14.6195	13.462	8.547	14.7656	12.9976	26.6366	19.1314	15.7593	7.02418	12.3348	28.7615	12.0575	18.8152	13.0672	15.6401	15.7003	17.3424	10.7937	46.7464	26.176	8.18054	8.32276	10.71	19.3807	13.249
AHNAK2	17.7196	36.1179	8.86644	14.8322	4.22805	15.1762	3.45381	15.8858	24.8083	4.4867	8.2985	13.6401	27.069	17.9869	17.8155	29.4305	7.30671	23.4432	29.2178	3.39997	9.67587	3.84389	13.5017	3.88715	25.8009	4.36228	2.10696	35.5338	73.1511	21.0626	17.4855	73.3745	5.94213	3.41977	9.56557	3.85448	10.3437	5.07757	5.85504	16.3181	5.84997	6.25348	57.6312	54.2144	3.34144	7.13997	17.8771	2.91183	7.02128
FUT4	6.4635	8.76444	7.54331	3.56167	7.38807	5.09228	11.1975	4.52224	8.57261	3.79646	11.7495	5.93079	18.1014	4.99385	4.48091	7.0882	6.78816	8.48701	5.37094	4.44308	15.5918	5.58696	7.8733	5.85592	6.42862	4.70163	3.23751	5.35746	6.0769	8.28225	9.10368	7.13343	5.45612	6.11155	6.95357	5.72012	5.22815	5.94966	6.3519	10.4302	6.58831	7.63127	8.16697	7.01197	4.26082	17.2567	7.70115	6.91692	4.42018
SHC1	88.5007	117.203	93.5619	91.7209	234.911	92.8506	69.9111	110.611	123.537	69.936	73.2012	143.923	235.189	96.9839	132.347	221.736	219.715	79.0222	124.812	48.2523	84.4483	74.3337	309.773	69.1872	125.026	55.745	24.6397	90.1058	137.154	118.209	80.6075	626.319	70.4088	113.658	129.923	104.524	97.6355	139.434	67.4415	92.3668	67.4253	103.535	198.016	298.586	78.7111	174.416	149.382	41.0673	195.671
ST13	93.4195	177.849	133.756	137.06	156.068	78.7605	254.466	76.1284	101.644	45.3453	79.4221	150.418	304.477	125.128	134.732	200.156	62.2918	204.249	163.101	145.03	131.378	70.5918	156.561	108.487	151.543	104.725	44.0005	100.056	172.539	89.6331	186.671	222.598	113.786	241.156	113.806	137.395	196.089	45.3878	191.003	80.8069	90.8969	171.994	122.864	187.544	142.087	163.148	250.865	164.58	103.789
TICAM1	28.5121	45.8169	23.9019	15.9653	28.6182	19.0846	15.0712	22.9363	23.4971	24.9032	45.4653	61.9059	34.6668	29.5174	31.661	27.4879	20.0686	27.8131	32.1208	14.4007	27.9028	11.7467	29.3595	24.4494	31.5896	14.7517	11.8831	62.367	18.6861	49.2679	20.2388	31.6928	19.7524	16.7887	25.6334	19.2013	27.615	38.0828	24.3685	23.8099	23.7976	25.2141	35.8165	39.9939	32.344	17.6054	57.2638	16.1991	44.5732
FAM83A	45.7364	113.855	98.0611	33.6851	6.34545	21.8386	3.16548	19.8161	168.376	106.147	4.64465	126.078	5.72658	37.72	92.7289	63.185	259.291	31.0625	84.8082	7.06735	73.0789	99.2839	100.203	11.0912	121.846	24.643	3.26201	72.5667	79.8435	59.0981	15.6342	114.546	16.343	13.5425	133.997	9.22991	23.7675	11.731	12.2992	34.7446	13.8852	7.17282	129.932	378.945	3.74703	3.84379	179.419	3.11382	59.012
EPHA2	47.1942	105.399	8.32586	47.927	34.6235	46.6323	16.4957	58.7403	36.0219	29.1376	57.3825	132.317	109.515	37.6335	65.2992	50.7274	20.8038	48.2378	15.5815	32.6109	14.4934	5.60654	37.5448	44.002	26.2538	47.9138	10.2551	42.2443	77.008	23.1879	81.6984	34.5884	16.3637	62.3861	55.0426	64.6216	94.2659	68.0875	28.3806	24.1225	38.8846	46.6369	262.425	96.4989	47.9895	43.0827	72.0835	6.39472	25.9984
SOWAHC	18.2496	24.1343	20.4334	17.0594	13.1117	10.3127	44.0774	19.5817	13.9881	6.13224	15.6738	25.0527	35.5053	18.2974	8.81387	16.1995	44.8485	12.9741	8.90677	9.27425	17.5895	13.8441	12.3388	9.01273	24.2412	8.75694	5.72184	11.0512	62.6793	23.1111	13.0761	34.9177	12.5437	34.2589	19.9043	10.4569	26.9379	9.49712	12.9537	11.9659	12.3323	11.4559	22.7279	58.5383	14.0455	32.0049	27.5894	11.0259	8.52507
KRT7	315.975	1547.74	212.6	623.316	309.961	295.793	6.79481	345.782	686.227	440.955	234.692	949.416	290.514	381.158	985.439	216.123	4302.34	1109.5	387.375	535.44	955.595	107.507	122.162	236.653	103.687	445.864	366.987	484.479	959.214	326.139	871.179	778.024	122.385	199.426	808.315	272.671	767.834	284.588	140.111	188.144	183.575	202.577	1194.24	800.515	455.231	79.5273	1069.38	20.1665	336.819
[truncated: 206 more columns]

## Sheet: S4
Table S4 Sensitivity of 138 drugs for LUAD patients
Drugs	P value	FDR
A.443654	3.49188e-27	4.78387e-25
A.770041	0.000101674	0.0074222
ABT.263	0.000627744	0.0389201
ABT.888	0.000113377	0.00804976
AG.014699	0.0377532	1
AICAR	2.46161e-16	3.0524e-14
AKT.inhibitor.VIII	0.00632325	0.322486
AMG.706	0.00295408	0.156566
AP.24534	3.84201e-05	0.00299677
AS601245	0.177465	1
ATRA	0.0149218	0.716249
AUY922	3.80202e-14	4.60044e-12
Axitinib	0.000753481	0.0444554
AZ628	4.25228e-05	0.00323173
AZD.0530	0.816963	1
AZD.2281	0.0244272	1
AZD6244	0.205551	1
AZD6482	0.704255	1
AZD7762	1.3078e-07	1.29472e-05
AZD8055	0.474396	1
BAY.61.3606	0.0104618	0.512627
Bexarotene	1.16503e-05	0.000990273
BI.2536	2.50375e-47	3.45518e-45
BIBW2992	3.49762e-05	0.00276312
Bicalutamide	0.256873	1
BI.D1870	1.75049e-07	1.71548e-05
BIRB.0796	0.589583	1
Bleomycin	2.29009e-11	2.5878e-09
BMS.509744	0.0411175	1
BMS.536924	0.0174602	0.812429
BMS.708163	0.0172857	0.812429
BMS.754807	0.00097037	0.0562815
Bortezomib	1.621e-06	0.000147511
Bosutinib	9.62889e-11	1.06881e-08
Bryostatin.1	0.00135566	0.0772725
BX.795	0.5302	1
Camptothecin	0.965046	1
CCT007093	2.09294e-23	2.80454e-21
CCT018159	1.05347e-07	1.05347e-05
CEP.701	0.969475	1
CGP.082996	8.43729e-06	0.000734044
CGP.60474	4.28682e-06	0.00037724
CHIR.99021	6.35004e-07	6.03254e-05
CI.1040	0.000346289	0.0235477
Cisplatin	0.0428611	1
CMK	1.32679e-19	1.72483e-17
Cyclopamine	2.02551e-08	2.08628e-06
Cytarabine	4.86855e-05	0.00365142
Dasatinib	0.00148607	0.0832201
DMOG	0.00524426	0.272702
Docetaxel	5.12443e-14	6.14932e-12
Doxorubicin	2.5466e-06	0.000226647
EHT.1864	1.04655e-17	1.33958e-15
Elesclomol	0.968983	1
Embelin	2.39902e-07	2.32705e-05
Epothilone.B	1.04585e-22	1.39098e-20
Erlotinib	0.00214949	0.116072
Etoposide	0.121632	1
FH535	4.10746e-05	0.00316274
FTI.277	1.5631e-19	2.0164e-17
GDC.0449	0.0393754	1
GDC0941	0.375782	1
Gefitinib	0.967015	1
Gemcitabine	1.41149e-10	1.55264e-08
GNF.2	0.182273	1
GSK269962A	0.10626	1
GSK.650394	1.38956e-17	1.76474e-15
GW.441756	1.37406e-26	1.86873e-24
GW843682X	5.38128e-25	7.26472e-23
Imatinib	0.730544	1
IPA.3	0.000454278	0.0295281
JNJ.26854165	0.586606	1
JNK.9L	0.0971044	1
JNK.Inhibitor.VIII	5.83181e-09	6.18172e-07
JW.7.52.1	1.5327e-16	1.91588e-14
KIN001.135	0.122826	1
KU.55933	1.50049e-12	1.72557e-10
Lapatinib	0.459655	1
Lenalidomide	1.42388e-06	0.000130997
LFM.A13	0.0597701	1
Metformin	1.37625e-05	0.00111476
Methotrexate	0.144034	1
MG.132	1.28626e-05	0.00105473
Midostaurin	1.70856e-09	1.82816e-07
Mitomycin.C	0.261564	1
MK.2206	9.19902e-07	8.64707e-05
MS.275	0.0325159	1
Nilotinib	0.496792	1
NSC.87877	1.82174e-06	0.000163956
NU.7441	0.742643	1
Nutlin.3a	5.43972e-12	6.20128e-10
NVP.BEZ235	0.380458	1
NVP.TAE684	0.00013451	0.00941568
Obatoclax.Mesylate	8.61896e-08	8.70515e-06
OSI.906	0.500709	1
PAC.1	0.507802	1
Paclitaxel	9.60487e-20	1.25824e-17
Parthenolide	1.66381e-08	1.73036e-06
Pazopanib	2.77963e-13	3.27997e-11
PD.0325901	9.32876e-06	0.000802273
PD.0332991	0.000722046	0.0433228
PD.173074	0.197277	1
PF.02341066	0.589583	1
PF.4708671	0.754338	1
PF.562271	0.00182379	0.100309
PHA.665752	0.000214414	0.0147945
PLX4720	1.82788e-10	1.99239e-08
Pyrimethamine	0.0677092	1
QS11	5.55035e-11	6.2164e-09
Rapamycin	0.000107239	0.00772122
RDEA119	5.20071e-05	0.00384853
RO.3306	3.66083e-07	3.5144e-05
Roscovitine	5.97009e-10	6.4477e-08
Salubrinal	0.507802	1
SB.216763	0.468696	1
SB590885	0.195141	1
Shikonin	1.83022e-14	2.25117e-12
SL.0101.1	2.22203e-08	2.26647e-06
Sorafenib	0.0630226	1
S.Trityl.L.cysteine	7.44659e-17	9.3827e-15
Sunitinib	0.0005099	0.0326336
Temsirolimus	0.000685625	0.0418231
Thapsigargin	0.000385867	0.0254672
Tipifarnib	0.010096	0.504798
TW.37	1.17165e-05	0.000990273
Vinblastine	1.40201e-06	0.000130387
Vinorelbine	2.36656e-13	2.8162e-11
Vorinostat	0.105461	1
VX.680	4.39055e-13	5.13695e-11
VX.702	3.18845e-14	3.88991e-12
WH.4.023	1.4161e-12	1.64268e-10
WO2009093972	0.667054	1
WZ.1.84	1.26466e-05	0.00104966
X17.AAG	9.50003e-09	9.97503e-07
X681640	0.000530215	0.0334035
XMD8.85	0.000363861	0.0243787
Z.LLNle.CHO	2.85736e-20	3.77171e-18
ZM.447439	2.16045e-05	0.00172836
